# Supplementary material
Source: PubMed Central journal article supplement (PMC3692281)
Supplement: NIHMS483776-supplement-6_si_013.pdf [file NIHMS483776-supplement-6_si_013.pdf]

## SUPPORTING INFORMATION

### Isotope Effects and Mechanism of the Chiral Brønsted Acid Catalyzed Aziridination Reaction

Mathew J. Vetticatt\*, Aman A. Desai, and William D. Wulff\*

*Department of Chemistry, Michigan State University, East Lansing,*

*Michigan 48824*

[wulff@chemistry.msu.edu](mailto:wulff@chemistry.msu.edu)

#### Table of Contents

|                                                                                                                                                                           |    |
|---------------------------------------------------------------------------------------------------------------------------------------------------------------------------|----|
| 1. Experimental Section .....                                                                                                                                             | 2  |
| A. Kinetic isotope effects (KIEs) and transition state (TS) geometry .....                                                                                                | 2  |
| B. The Singleton method for determining KIEs using natural abundance <sup>13</sup> C NMR .....                                                                            | 3  |
| C. Complete structural assignment of 4a, <sup>1</sup> H NMR and <sup>13</sup> C NMR spectra for a representative KIE experiment, and 2D (HMQC and HMBC) NMR spectra ..... | 5  |
| D. NMR measurements and trivial KIEs .....                                                                                                                                | 9  |
| 2. Theoretical Section .....                                                                                                                                              | 11 |
| A. Methods and general comments .....                                                                                                                                     | 11 |
| 3. References .....                                                                                                                                                       | 11 |
| 4. Coordinates of calculated structures .....                                                                                                                             | 12 |
| A. Coordinates of Stationary Points in Figure 2 (Lowest energy structures) .....                                                                                          | 12 |
| catalyst- <b>1a</b> complex .....                                                                                                                                         | 12 |
| ethyldiazoacetate <b>2</b> .....                                                                                                                                          | 13 |
| TS1 .....                                                                                                                                                                 | 13 |
| Gauche <b>3a</b> .....                                                                                                                                                    | 14 |
| TS <sub>conf</sub> .....                                                                                                                                                  | 16 |
| Anti <b>3a</b> .....                                                                                                                                                      | 17 |
| TS2 .....                                                                                                                                                                 | 18 |
| cis-aziridine <b>4a</b> .....                                                                                                                                             | 19 |
| ( <i>S</i> )-VANOL-BOROX catalyst neutral .....                                                                                                                           | 20 |
| Nitrogen (N <sub>2</sub> ) .....                                                                                                                                          | 21 |
| B. Alternative Carbon-Carbon Bond Forming Transition Structures (major enantiomer) .....                                                                                  | 21 |
| TS1a .....                                                                                                                                                                | 21 |
| TS1b .....                                                                                                                                                                | 22 |
| TS1c .....                                                                                                                                                                | 24 |
| TS1d .....                                                                                                                                                                | 25 |
| C. Alternative Ring Closing Transition Structures (major enantiomer) .....                                                                                                | 26 |
| TS2a .....                                                                                                                                                                | 26 |
| TS2b .....                                                                                                                                                                | 28 |
| TS2c .....                                                                                                                                                                | 29 |
| TS2d .....                                                                                                                                                                | 30 |
| TS2e .....                                                                                                                                                                | 32 |
| TS2f .....                                                                                                                                                                | 33 |
| D. Side-products .....                                                                                                                                                    | 34 |
| TS2-H-migration .....                                                                                                                                                     | 35 |
| TS2-phenyl-migration .....                                                                                                                                                | 35 |
| E. <i>trans</i> -Aziridine Reaction Coordinate .....                                                                                                                      | 37 |
| TS3 .....                                                                                                                                                                 | 37 |
| <i>trans</i> -anti-3a .....                                                                                                                                               | 38 |
| TS4 .....                                                                                                                                                                 | 39 |
| <i>trans</i> -aziridine 4a .....                                                                                                                                          | 41 |

|    |                                                           |    |
|----|-----------------------------------------------------------|----|
| F. | $S_N1$ mechanism.....                                     | 41 |
|    | TS2- $S_N1$ .....                                         | 41 |
| G. | cis-Aziridine minor enantiomer transition structures..... | 43 |
|    | TS1- <i>ent</i> .....                                     | 43 |
|    | TS2- <i>ent</i> .....                                     | 44 |

## 1. Experimental Section

### A. Kinetic isotope effects (KIEs) and transition state (TS) geometry

Kinetic isotope effect measurements are powerful mechanistic probes. Figure S1 is a 2D representation of the vibrational normal modes associated with the reactant and the transition state for a reaction, focusing on as an example the stretching vibration of a C-H bond. Isotopic substitution, in this case by deuterium, affects the zero-point energy (ZPE) of the vibrational normal modes of a molecule. The main origin of KIEs lies in how the ZPE is different at the stage of reactants versus the transition state. When the normal modes are looser at the transition state versus the starting material, as is most common, the ZPE is decreased and lighter isotopes encounter a smaller barrier. As a result, lighter isotopes tend to react faster ( $k_{\text{light}}/k_{\text{heavy}} > 1$ ) and this observation is referred to as a “normal” isotope effect. Sometimes the normal modes are tighter at the transition state versus the starting material; this causes the ZPE to be increased at the transition state and heavier isotopes encounter a lower barrier. The resulting faster rate for the heavier isotope ( $k_{\text{light}}/k_{\text{heavy}} < 1$ ) is an “inverse” isotope effect. Since the KIEs are intimately associated with the normal modes at the transition state, KIEs can be used to experimentally probe the transition state geometry, i.e. the extent of bond formation / bond breaking occurring as the reaction goes over the transition state.

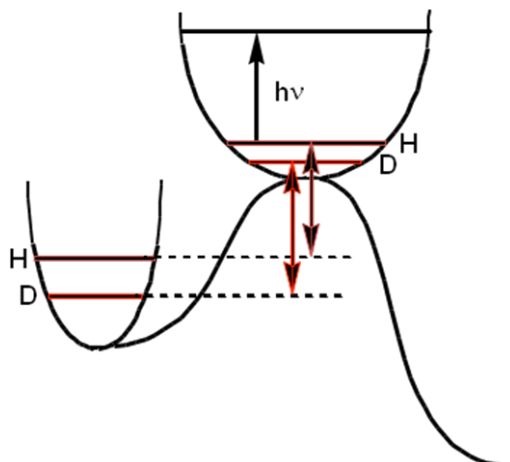

Figure S1. **The origin of a kinetic isotope effect**

### B. The Singleton method for determining KIEs using natural abundance $^{13}\text{C}$ NMR

Each individual carbon and hydrogen in an organic molecule contains at natural abundance approximately 1.1% of  $^{13}\text{C}$  and 0.015% of  $^2\text{H}$ . As a reaction progresses, the starting materials are enriched in the slower reacting isotopomers (isotopically substituted isomers) and the products in the faster reacting ones. If this isotopic enrichment at every position in a molecule can be measured, KIEs can be determined without the use of explicitly labeled substrate. The Singleton method applies this idea to determine  $^{13}\text{C}$  and  $^2\text{H}$  KIEs at natural abundance using carefully acquired NMR as a method to determine these isotopic compositions. There are two main strategies that can be used for the determination of KIEs using this methodology.

- (a) *Intermolecular starting material KIEs* – The original methodology developed in the Singleton group measured KIEs by analysis of starting material recovered from reactions taken to high conversion, typically ~80%. The isotopic composition of this recovered material is determined by NMR at natural abundance and compared to that of unreacted starting material (drawn from the bottle originally used for the reaction). The enrichment (depletion) thus measured can be used to determine the KIEs based on eq 1, where  $F_1$  is the fractional conversion of the lighter isotopomer and  $R/R_0$  is the proportion of minor isotopic component in recovered starting material versus the original material.

$$\frac{\log(1-F_1)}{\log[(1-F_1)(R/R_0)]} \quad (1)$$

This methodology has some advantages when it can be applied. One advantage is that the precision of the KIEs obtained can exceed the precision of the analysis. Another advantage is that the KIEs are insensitive to further side reactions that the product may undergo. A disadvantage is that the methodology cannot be applied to reactants that must be used in large excess.

- (b) *Intermolecular product KIEs* – An alternative process involves taking reactions to low conversion (typically ~20%) and analyzing the isolated reaction product. The isotopic composition of the product, enriched in the faster reacting isotope, is compared to that of product isolated from a reaction taken to 100% conversion reaction (no isotopic fractionation). Equation 2 is then used to calculate the KIEs. This method is prone to two possible errors.

$$\frac{\log(1-F_1)}{\log[1-(F_1R_p/R_o)]} \quad (2)$$

Further conversion of product to form side product will adversely affect the measurement. Also, errors may arise from any inefficiency in the 100% conversion reaction. The subtle modification of this methodology described in this work was originally developed by MJV during his graduate studies in the Singleton group. This modification is time-efficient and accurate, especially for reactions where it is required to determine KIEs for both reactants in a bimolecular reaction. In such cases separate low conversion and 100% conversion reactions are usually performed for each reactant (total 4 reactions for one KIE experiment) in order to ensure accurate determination of fractional conversion, since 1:1 mixtures of starting materials rarely give quantitative yields of product. By using this modified methodology, we eliminate the 100% conversion reactions (thereby getting the same information from 2 reactions instead of 4 reactions) by performing the low conversion reaction for each reactant using limiting amounts (0.2 eq to get to 20% conversion) of the other. Under these conditions, the limiting reagent in both reactions undergo no isotopic fractionation upon going from starting material to product and hence serve as the 100% sample for the complementary reaction.

**C. Complete structural assignment of 4a,  $^1\text{H}$  NMR and  $^{13}\text{C}$  NMR spectra for a representative KIE experiment, and 2D (HMQC and HMBC) NMR spectra**

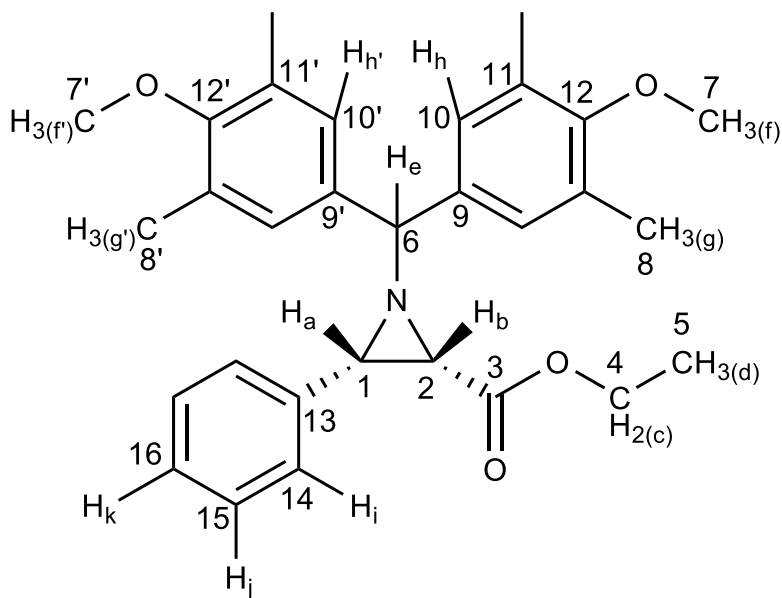

$^1\text{H}$  NMR Spectrum of **4a** from a KIE experiment (500 MHz,  $\text{CDCl}_3$ ):

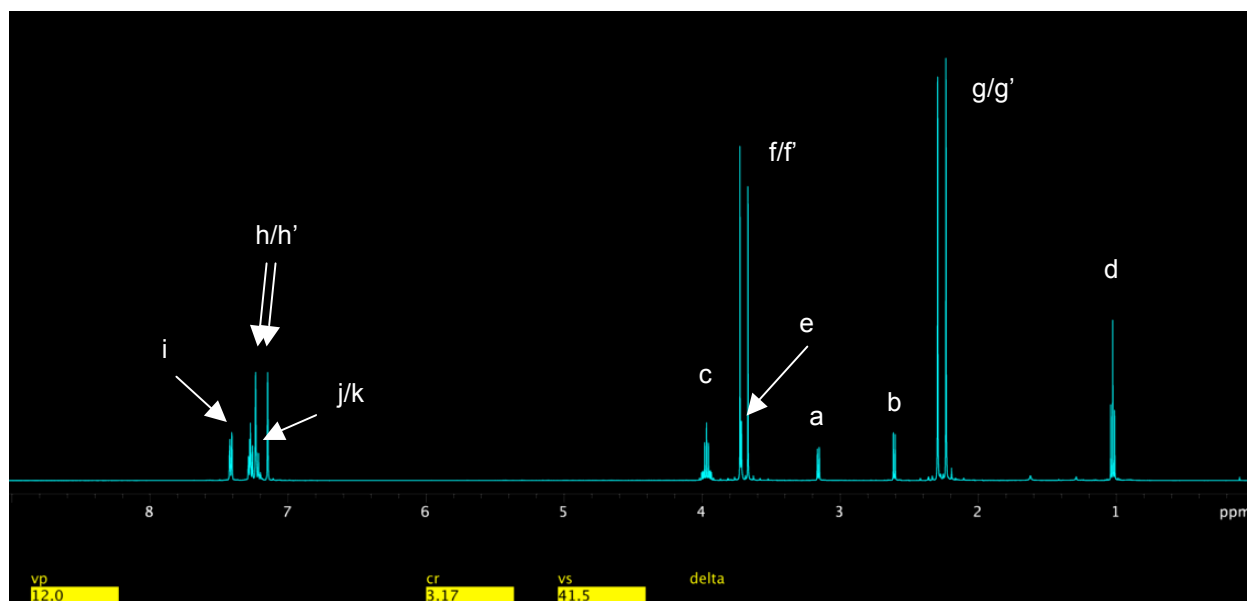

$^{13}\text{C}$  NMR Spectrum of **4a** from a KIE experiment (125 MHz,  $\text{CDCl}_3$ ):

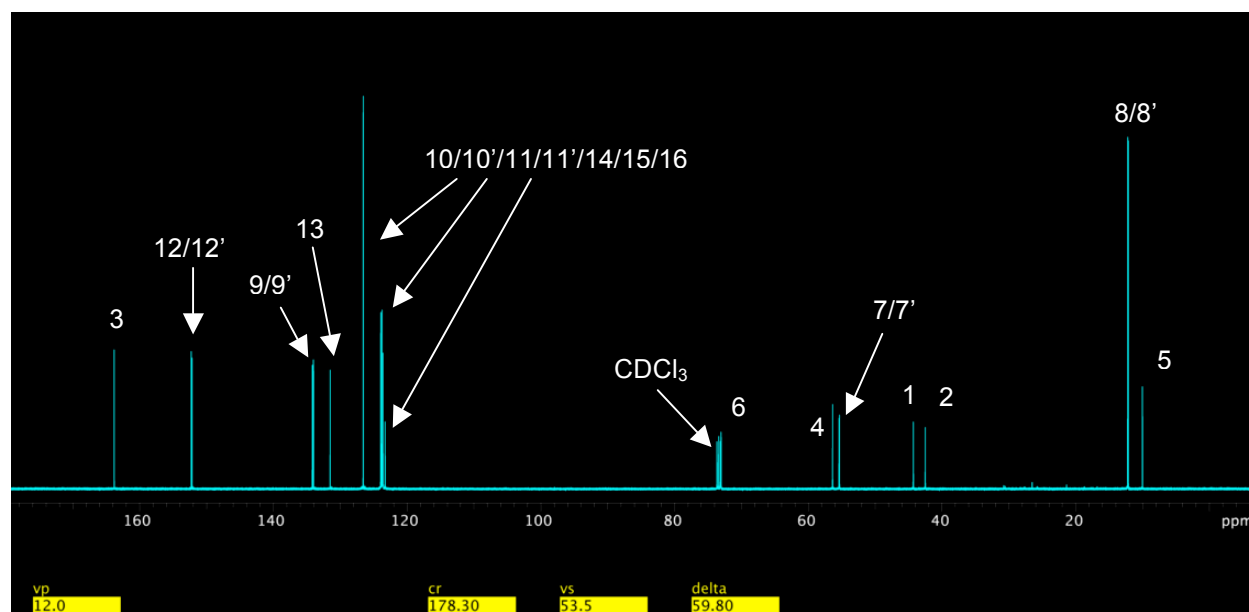

2-D HMQC (Heteronuclear Multiple Quantum Coherence) experiment NMR Spectrum ( $\text{CDCl}_3$ ):

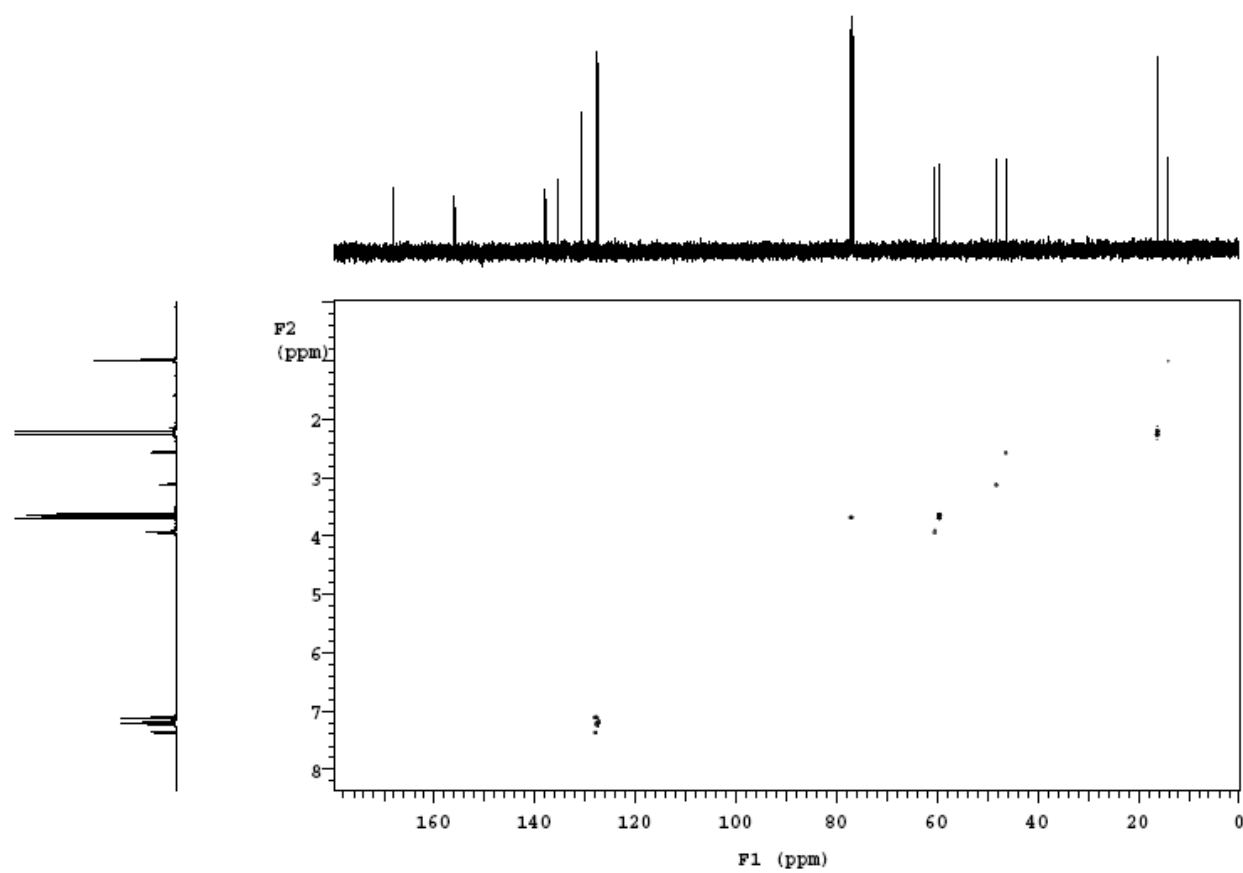

2-D HMBC (Heteronuclear Multiple Bond Correlation) experiment NMR Spectrum (CDCl<sub>3</sub>):

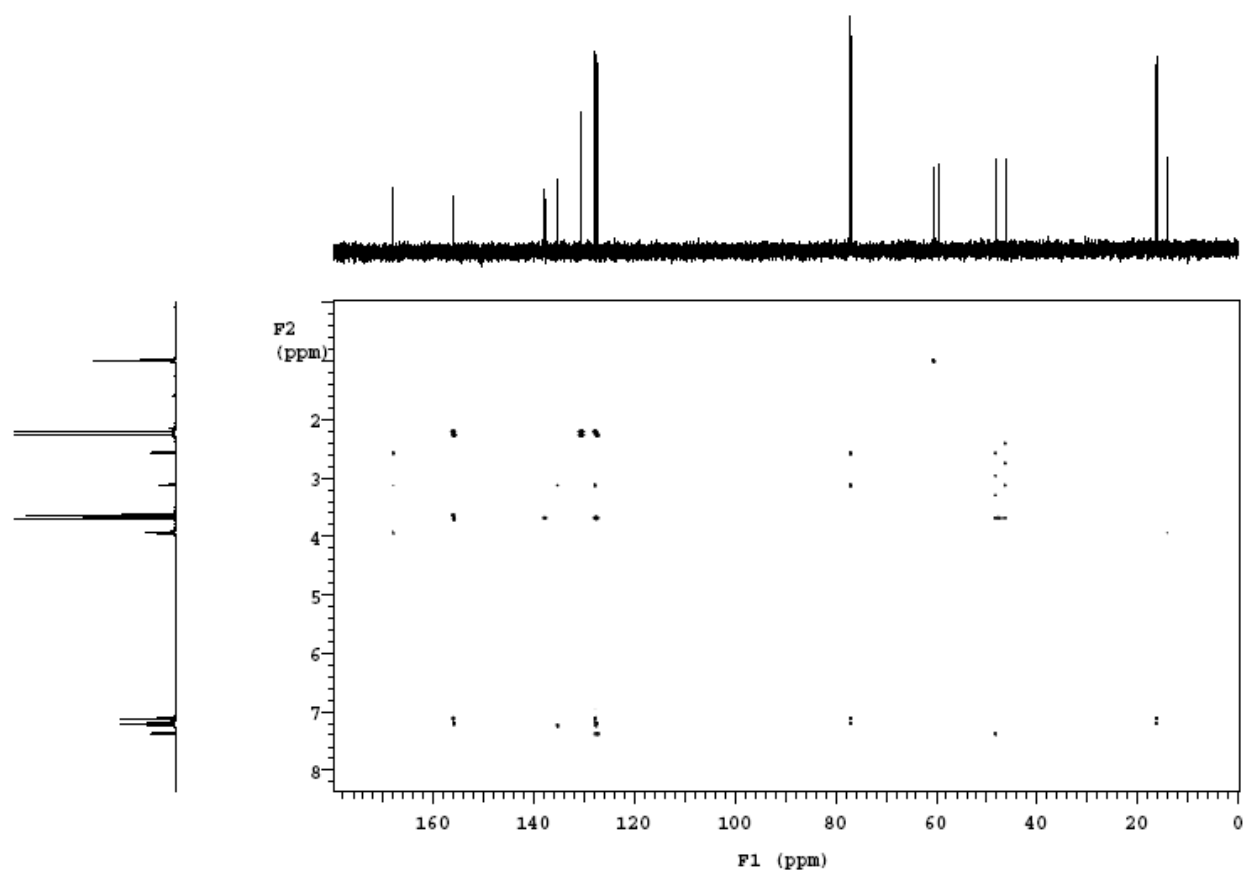



## D. NMR measurements and trivial KIEs

All samples were prepared using a constant 450 mg of **4a** in 5 mm NMR tubes filled with CDCl<sub>3</sub> to a constant height of 5.5 cm. The <sup>13</sup>C spectra were recorded at 125 MHz using inverse gated decoupling, 15 s (5 times T1) delays between calibrated  $\pi/2$  pulses, and a 5.0 s acquisition time. Integrations were determined numerically using a constant integration region for each peak. A zero-order baseline correction was generally applied, but in no case was a first-order (tilt) correction applied. Six spectra each with 512 transients were obtained for each four samples of **4a** (two samples per experiment). The integration of the methyl peak of the ester moiety of **4a** (peak 5, Figure S2) was set to 1.000 since the KIE at this position is expected to be negligible.

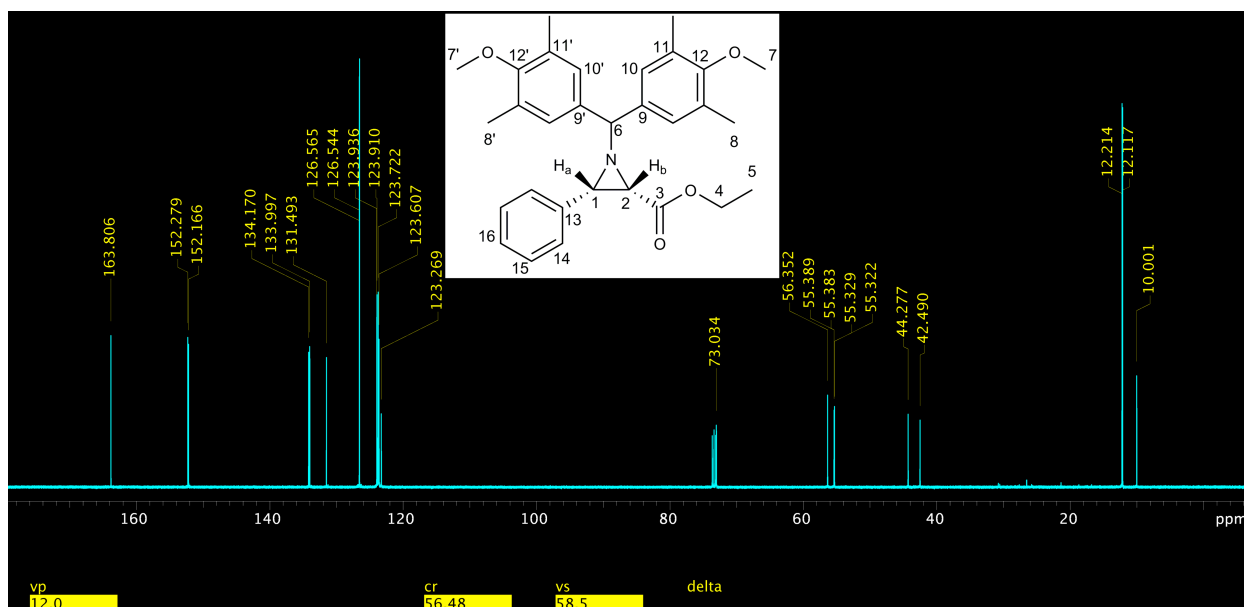

**Figure S2.** Representative NMR spectrum showing accurate chemical shift that illustrates near-overlap of several peaks and the good separation of the peaks of interest. CDCl<sub>3</sub> is at  $\delta$  73.4.

Using the Singleton method, one can measure the KIE for every carbon in a molecule provided the peaks are well separated. We were fortunate that the peaks of interest in **4a**, namely C1, C2, C5 ( $\delta$  44.277, 42.490 and 10.001, Figure S2) were separated from all other peaks by at least 2 ppm. This enables us to use C5 as the standard peak and accurately determine the integrations of C1 and C2 (see Figure S3). This is one of the largest published molecules used for KIE analysis by the Singleton method. The primary goal during acquisition of NMR spectra for KIE measurements was to have the best line shapes and line widths for the peaks of interest including the standard peak.

Due to the diastereotopic nature of the aromatic groups on the MEDAM moiety, there were several pairs of peaks that were too close for accurate reproducible integrations (Figure S3).

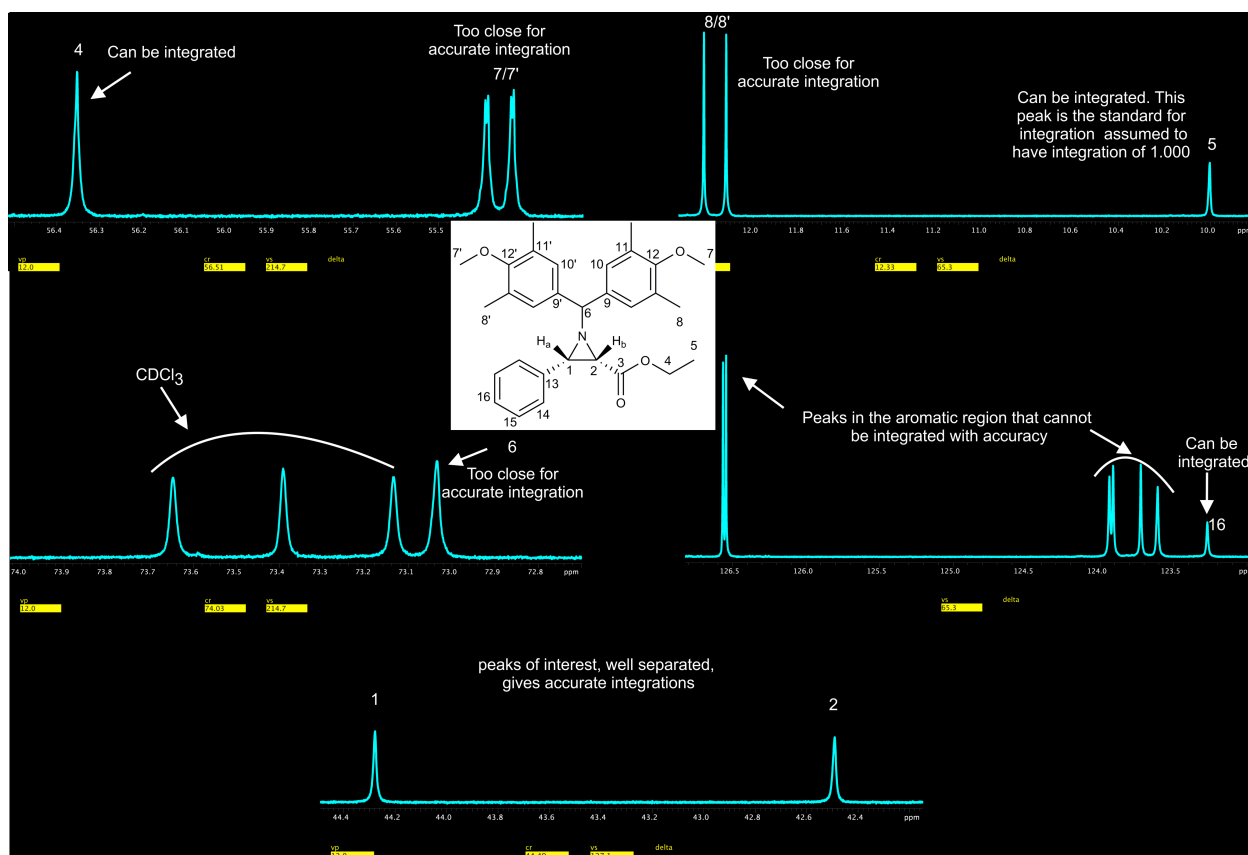

**Figure S3.** Peaks that are easily integrated versus ones that are too close for reproducible integrations.

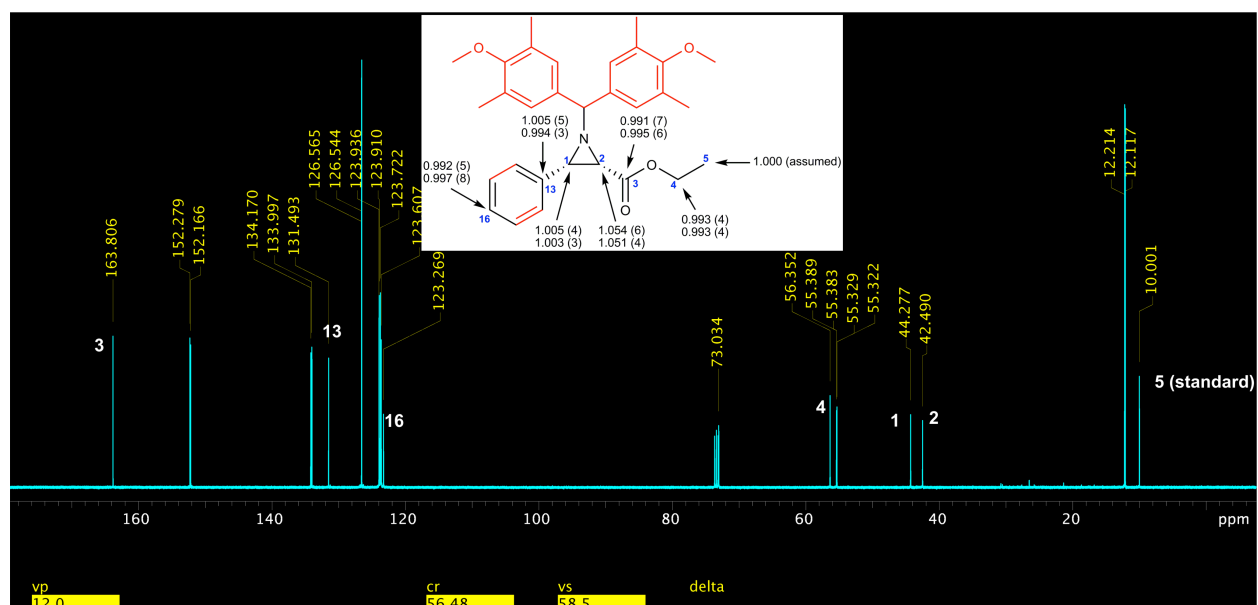

**Figure S4.** Spectrum highlighting the well-separated peaks and the corresponding KIEs from two experiments. The carbon atoms shown in red are the ones that were too close for meaningful integrations. Nevertheless, the spectrum was acquired with a delay time of 5 times the T1 relaxation time of the peak with the largest T1 relaxation time.

## 2. Theoretical Section

### A. Methods and general comments

The ONIOM calculations were setup using GaussView 5.0 (the interface between Gaussian and Windows). Intermediates were located by performing IRC calculations from the relevant transition structures and optimizing the geometry of the resulting structures. A thorough conformational search was also performed for locating the lowest energy starting materials used for the calculation of theoretical KIEs.

**TS<sub>conf</sub>** was located after a careful conformational search performed by fixing the dihedral angle (between the C2-N<sub>2</sub><sup>+</sup> (diazonium) and the C1-N (imine) bond along the C1-C2 bond) at a series of values between -100° and -130° and locating the energy maxima. A transition state search was then performed on this geometry to arrive at the unrestricted **TS<sub>conf</sub>** with one imaginary frequency of ~ -6, which corresponds to bond rotation about the C1-C2 bond. The KIE for this transition state was computed as an equilibrium isotope effect between **TS<sub>conf</sub>** and free starting material, since imaginary frequencies below -50 cannot be used by ISOEFF98 for the prediction of KIEs. This is expected to make little or no difference to the actual value of the KIEs since there is no bond formation/breaking occurring at this transition state.

A very detailed search was performed for locating the lowest energy carbon-carbon bond forming (**TS1** in main text and **TS1a-d** in Supporting Information) and ring-closing (**TS2** in main text and **TS2a – TS2f** in Supporting Information) transition states. Finally, Single-point energies were performed on TS1, TS2, TS3 and TS4 using M062x/6-31+G\*\* method and a PCM model for toluene (reaction solvent) to further support that the trends in the relative energies of the transition structures reported in the paper. The relative energies of the addition and ring-closing transition structure from these single-point energy calculations for the *cis*- and *trans*- aziridination pathway are shown below.

|            | Relative Gibbs Free Energies<br>(from Figure 9) (kcal/mol) | Relative Potential Energies (kcal/mol)<br>M062x/6-31+G** (toluene) |
|------------|------------------------------------------------------------|--------------------------------------------------------------------|
| <b>TS1</b> | 0.0                                                        | 0.0                                                                |
| <b>TS2</b> | 4.0                                                        | 8.2                                                                |
| <b>TS3</b> | 0.0                                                        | 0.0                                                                |
| <b>TS4</b> | 0.6                                                        | 1.4                                                                |

### 3. References

- Zhang, Y.; Lu, Z.; Desai, A.; Wulff, W. D. *Org. Lett.* **2008**, *10*, 5429-5432.

### 4. Coordinates of calculated structures

#### A. Coordinates of Stationary Points in Figure 2 (Lowest energy structures)

##### catalyst-1a complex

cat-imine-complex-ONIOM-M062x-BB

E(RAM1) = -0.731982597510

E(RM062X) = -969.291063700

E(RAM1) = -1.08399419095

Zero-point correction= 1.174664  
(Hartree/Particle)  
Thermal correction to Energy= 1.246902  
Thermal correction to Enthalpy= 1.247847  
Thermal correction to Gibbs Free Energy= 1.052209  
Sum of electronic and zero-point Energies= -967.764388  
Sum of electronic and thermal Energies= -967.692150  
Sum of electronic and thermal Enthalpies= -967.691206  
Sum of electronic and thermal Free Energies= -967.886843

|       | E (Thermal)<br>KCal/Mol | CV<br>Cal/Mol-Kelvin | S<br>Cal/Mol-Kelvin |
|-------|-------------------------|----------------------|---------------------|
| Total | 782.443                 | 274.729              | 411.754             |

C,0,3.5965674711,2.4256351177,-0.7383548768  
C,0,4.2837656741,1.9756187675,0.3979546934  
C,0,5.5430014475,2.5235931916,0.6895532367  
C,0,6.0998154051,3.4957573005,-0.1386370396  
C,0,5.4107050122,3.9332236166,-1.2692795263  
C,0,4.1601429406,3.3934126061,-1.5678313  
C,0,3.6803280618,0.9949582727,1.307359738  
C,0,2.9478650538,-0.1365228474,0.8306839287  
C,0,2.1941913918,-0.8744791138,1.7479985534  
C,0,2.3383594289,-0.6723310752,3.1626118428  
C,0,3.1670306763,0.3809422019,3.6154687009  
C,0,3.7848676916,1.231305071,2.6657206926  
C,0,3.3399506446,0.5693813279,5.0147255275  
C,0,2.7139568242,-0.2601044121,5.9128648902  
C,0,1.881513305,-1.3101979057,5.4575387701  
C,0,1.6970338631,-1.513057747,4.110633566  
H,0,1.3969195137,-1.9673929783,6.1938282857  
C,0,2.9621937068,-0.5201468737,-0.5830715254  
C,0,1.7635498545,-0.693616731,-1.2741473391  
C,0,1.7342241737,-0.9222407893,-2.6869596597  
C,0,2.9638589133,-1.0005339161,-3.3837214088  
C,0,4.1752062705,-0.9612445115,-2.6496363491  
C,0,4.1866697837,-0.7695472062,-1.2809289481  
C,0,0.5181551683,-1.0769350487,-3.4038690299  
C,0,0.5295211595,-1.2528173713,-4.7660940823  
C,0,1.7568780844,-1.2902195576,-5.4701974159  
C,0,2.947362211,-1.1736927556,-4.7954748873  
H,0,-0.4221876696,-1.0750097188,-2.8293268767  
O,0,0.5511246005,-0.6022364027,-0.6325039438  
B,0,0.2552158254,-1.6749225179,0.3696547659  
O,0,1.3421113144,-1.8716035075,1.3815698377

C,0,5.4640276734,-0.9332727991,-0.5791198235  
C,0,6.6364416134,-0.3594772968,-1.0926436657  
C,0,7.8617312144,-0.5819275814,-0.4675311519  
C,0,7.9328362943,-1.3837083537,0.6712052694  
C,0,6.7720729739,-1.9606724121,1.1856734388  
C,0,5.54371519,-1.7388145785,0.5663661027  
O,0,-0.9861342209,-1.182074457,1.0432332234  
B,0,-1.9786568626,-2.0390414456,1.4159100696  
O,0,-1.9719606007,-3.3497549845,1.0391688466  
B,0,-0.9836919999,-3.7910188789,0.1547529838  
O,0,-1.1788591232,-5.1005199337,-0.2695181606  
C,0,-0.3764201255,-5.8337368263,-1.1175021514  
C,0,-0.9047024319,-7.0935383678,-1.4555413038  
C,0,-0.1658989658,-7.9260833108,-2.2903424401  
C,0,1.0740943485,-7.5178870265,-2.7844778502  
C,0,1.5841563011,-6.2662106127,-2.4420358207  
C,0,0.8656125401,-5.4124215963,-1.6063206718  
O,0,-2.9852213333,-1.4518932404,2.1922428273  
C,0,-4.1502642529,-2.0322288607,2.6476860109  
C,0,-4.5704248924,-3.3315364125,2.3387829468  
C,0,-5.7825510795,-3.7878508168,2.8545770527  
C,0,-6.5637751811,-2.9653244512,3.6655811601  
C,0,-6.1330516076,-1.6732122225,3.9691103661  
C,0,-4.9272374404,-1.1928512692,3.4673364763  
O,0,0.0098549009,-2.9738587448,-0.2276569115  
N,0,-1.595996055,1.4275057098,0.7319475589  
C,0,-1.8802912347,2.2366479728,1.6867236904  
C,0,-1.7742972863,1.9610168442,3.1103660836  
C,0,-2.2859080073,2.9314581453,3.9856365018  
C,0,-2.2082015103,2.7411864777,5.3594961102  
C,0,-1.6004784628,1.5897873528,5.8597616058  
C,0,-1.0761980532,0.6294960604,4.9915672006  
C,0,-1.1613193285,0.8048534476,3.6172398902  
C,0,-1.6615274699,1.7687022346,-0.7419949663  
C,0,-1.4951862998,3.2348447908,-0.9578404273  
C,0,-2.5831978053,4.0736916857,-1.2119490022  
C,0,-2.4005082309,5.4426087065,-1.4306031299  
C,0,-1.0970263923,5.9664690623,-1.3783862581  
C,0,0.0118948621,5.1382285793,-1.118310823  
C,0,-0.2019265624,3.7729348716,-0.9170767309  
C,0,-3.5688559837,6.3093193977,-1.7080717351  
O,0,-0.8905778901,7.3378009959,-1.4759152631  
C,0,-0.8700578796,7.818111288,-2.8210851746  
C,0,1.3753193294,5.7083643978,-1.0355498608  
C,0,-2.8854532872,1.2130261874,-1.3866909112  
C,0,-2.7469847609,0.6162926841,-2.6450168915  
C,0,-3.853831501,0.0861300775,-3.3141476667  
C,0,-5.1150773533,0.1569208385,-2.6965820607  
C,0,-5.2710054062,0.7423427546,-1.4261543802  
C,0,-4.1463129097,1.2683704261,-0.7850295564  
C,0,-6.5932776983,0.7749204131,-0.7609653768  
O,0,-6.2189027869,-0.4541037836,-3.2816062366  
C,0,-6.8141786601,0.3184170691,-4.3239109643  
C,0,-3.6762538968,-0.5508840867,-4.639396142  
H,0,-3.9491262329,-3.9824810116,1.7019058939  
H,0,-6.1204223526,-4.8077831817,2.6171393502  
H,0,-7.5175417014,-3.3346136541,4.0680286602  
H,0,-6.7477164858,-1.0263117916,4.6121635487

H,0,-4.5751235896,-0.1803499446,3.7026673065  
H,0,-1.8811124946,-7.3998009237,-1.0569057631  
H,0,-0.5666357203,-8.9139721708,-2.5608511009  
H,0,1.6479364609,-8.184411976,-3.4432978034  
H,0,2.5614018677,-5.9439987188,-2.8311889882  
H,0,1.2622554378,-4.4209670445,-1.332632859  
H,0,1.7425577881,-1.4255975138,-6.5615077588  
H,0,3.9072905286,-1.2183567203,-5.3308101478  
H,0,5.119806938,-1.128320366,-3.1904011945  
H,0,6.5846651482,0.2755069307,-1.9896770078  
H,0,8.7742933778,-0.124523655,-0.8761303914  
H,0,8.9008791515,-1.5614755219,1.1608294998  
H,0,6.8228844434,-2.5949358236,2.0827860935  
H,0,4.6258886274,-2.1924334132,0.9743161751  
H,0,6.1002368659,2.1692739281,1.5702764397  
H,0,7.0890220999,3.9138031581,0.0985730422  
H,0,5.8539594206,4.6958938681,-1.9252462371  
H,0,3.6204958626,3.7223014977,-2.4682063192  
H,0,2.6146737701,1.9910114799,-0.9839147335  
H,0,4.3494556003,2.1011313726,3.0348984489  
H,0,3.9919724001,1.3857139125,5.3586391494  
H,0,2.8564239846,-0.1223301173,6.9947442904  
H,0,-0.784580027,1.2357521904,-1.1449501233  
H,0,-1.307899322,0.4318390412,0.92203505  
H,0,-2.2224388724,3.2338385947,1.3950102748  
H,0,-2.7424712862,3.8329187368,3.5842073373  
H,0,-2.6066406323,3.489495797,6.0359386396  
H,0,-1.5244998279,1.4438235879,6.9327704399  
H,0,-0.5779224352,-0.2531339051,5.3831544321  
H,0,-0.7451578703,0.0576477094,2.9488754108  
H,0,-3.6032703219,3.6573227507,-1.2553851879  
H,0,-4.4684705974,5.9562484657,-1.1463744519  
H,0,-3.8090815446,6.2890533132,-2.8014169945  
H,0,-3.3549023439,7.367070942,-1.4128102391  
H,0,-0.7162529265,8.9199560948,-2.7052261783  
H,0,-1.8421936237,7.6015058391,-3.3271303617  
H,0,-0.0250438639,7.3553140764,-3.3858233624  
H,0,2.1567614211,4.9139648691,-1.1421470635  
H,0,1.5137446611,6.2129066072,-0.0456513097  
H,0,1.5249061928,6.4765590868,-1.8351198689  
H,0,0.6631705123,3.113824157,-0.7288662476  
H,0,-4.271702573,1.7225801089,0.2099060101  
H,0,-7.415194694,0.7981633351,-1.5196171512  
H,0,-6.6879885581,1.6679175633,-0.0962872573  
H,0,-6.72364482,-0.1467117637,-0.1380813804  
H,0,-7.6413716559,-0.335161544,-4.6979109334  
H,0,-6.0724078034,0.5244824349,-5.133679769  
H,0,-7.2183934016,1.2754679719,-3.9138173007  
H,0,-2.6817808335,-1.0602413,-4.7023306176  
H,0,-3.7265160527,0.2217854792,-5.4477459208  
H,0,-4.4780040274,-1.30948852,-4.8222762172  
H,0,-1.7526276249,0.5526871002,-3.1185786328  
H,0,-0.4108151763,-1.3781318317,-5.3222802988  
H,0,1.0650130697,-2.3331771941,3.7320061595

## Ethyldiazoacetate 2

ethyldiazoacetate-M06-BB  
E(RM062X) = -415.788118424

Zero-point correction= 0.105956  
(Hartree/Particle)  
Thermal correction to Energy= 0.114528  
Thermal correction to Enthalpy= 0.115473  
Thermal correction to Gibbs Free Energy= 0.071736  
Sum of electronic and zero-point Energies= -415.682162  
Sum of electronic and thermal Energies= -415.673590  
Sum of electronic and thermal Enthalpies= -415.672646  
Sum of electronic and thermal Free Energies= -415.716383

|       | E (Thermal)<br>KCal/Mol | CV<br>Cal/Mol-Kelvin | S<br>Cal/Mol-Kelvin |
|-------|-------------------------|----------------------|---------------------|
| Total | 71.868                  | 28.600               | 92.052              |

C,0,-1.6288194483,-1.4132412007,0.  
O,0,-0.2394915023,-1.0449329006,0.  
C,0,0.0040450833,0.2773044876,0.  
C,0,1.4364865414,0.5312134596,0.  
N,0,1.8009014801,1.7887270843,0.  
N,0,2.087666021,2.8773062038,0.  
O,0,-0.8581915604,1.1311056544,0.  
C,0,-1.6905435388,-2.9246498456,0.  
H,0,-2.1054366772,-0.980174042,0.8844388213  
H,0,-2.1054366772,-0.980174042,-0.8844388213  
H,0,2.2099681753,-0.2196289796,0.  
H,0,-2.7335775479,-3.2516650893,0.  
H,0,-1.1993626741,-3.3314343908,-0.887292435  
H,0,-1.1993626741,-3.3314343908,0.887292435

## TS 1

E(RM062X) = -1385.07842391

E(RAM1) = -1.09790935653

Zero-point correction= 1.282225  
(Hartree/Particle)  
Thermal correction to Energy= 1.363503  
Thermal correction to Enthalpy= 1.364447  
Thermal correction to Gibbs Free Energy= 1.148463  
Sum of electronic and zero-point Energies= -1383.441898  
Sum of electronic and thermal Energies= -1383.360620  
Sum of electronic and thermal Enthalpies= -1383.359675  
Sum of electronic and thermal Free Energies= -1383.575660

|       | E (Thermal)<br>KCal/Mol | CV<br>Cal/Mol-Kelvin | S<br>Cal/Mol-Kelvin |
|-------|-------------------------|----------------------|---------------------|
| Total | 855.611                 | 306.574              | 454.577             |

C,0,5.8810084179,-1.2659556592,-2.2797804306  
C,0,6.0982305608,-1.5466174022,-0.9229712494  
C,0,7.0371147736,-2.5271160138,-0.5701267366  
C,0,7.7385675389,-3.217482444,-1.556508322  
C,0,7.5171588907,-2.933035306,-2.903626932  
C,0,6.5878928304,-1.9568315666,-3.2620170613  
C,0,5.4180098531,-0.7638253977,0.114381625  
C,0,4.019602527,-0.4684284377,0.0492859227  
C,0,3.5101270902,0.5154476218,0.8968231505  
C,0,4.3011437823,1.0755763142,1.9524913193  
C,0,5.6471294123,0.6581317804,2.0855802235  
C,0,6.1915622552,-0.2338042686,1.1291824421  
C,0,6.4305057454,1.180434236,3.1519072969  
C,0,5.8946228853,2.087014654,4.0332290917  
C,0,4.5546490034,2.5183962509,3.8870729281  
C,0,3.7766181855,2.0247780038,2.8683911311  
C,0,3.1472930671,-1.1383445913,-0.9185096374  
C,0,2.3923275685,-0.3703216223,-1.8084706388  
C,0,1.7060020041,-0.9701720304,-2.914928243  
C,0,1.708518234,-2.3811468688,-3.0260252082  
C,0,2.3374551642,-3.1533998327,-2.0180490518  
C,0,3.0313200485,-2.5612056949,-0.9787425652  
C,0,1.0458550902,-0.1931692507,-3.9035015026  
C,0,0.4204669603,-0.8035094568,-0.4570611003  
C,0,0.4258263869,-2.2138708084,-5.0798255507  
C,0,1.0525064887,-2.9868369703,-4.1330331154  
O,0,2.318807332,0.9894653217,-1.6954303052  
B,0,1.7049284914,1.5668664045,-0.4570611003  
O,0,2.2096653532,0.9458415981,0.816836395  
C,0,3.5533132762,-3.4341369667,0.0781355163  
C,0,3.3880692777,-3.1013844795,1.4303366396

C,0,3.8184630915,-3.971605869,2.4296245548  
 C,0,4.4198247471,-5.1841342004,2.0940352284  
 C,0,4.5943246539,-5.5209510517,0.7521245055  
 C,0,4.16388193,-4.6543895963,-0.2504464926  
 O,0,0.2356471812,1.3081198909,-0.4340860937  
 B,0,-0.5554670397,2.1408079548,-1.1391621712  
 O,0,-0.1361038507,3.3668041381,-1.5839806097  
 B,0,1.1084872702,3.8215810682,-1.1414502999  
 O,0,1.3131863298,5.1790191397,-1.3913712812  
 C,0,2.4636059503,5.9015755891,-1.1594670814  
 C,0,3.6762204238,5.3554827586,-0.7216137836  
 C,0,4.7693747082,6.201522143,-0.5416546446  
 C,0,4.6572972818,7.5685161436,-0.7933375741  
 C,0,3.4438548098,8.1005784134,-1.2319674892  
 C,0,2.3366651956,7.2789225861,-1.4192875921  
 O,0,-1.8875249206,1.6995712797,-1.3578995988  
 C,0,-2.7770890147,2.3375584115,-2.2020723128  
 C,0,-3.5876799981,1.4978817822,-2.9833158296  
 C,0,-4.5836330285,2.0695662919,-3.7715468833  
 C,0,-4.7592433493,3.4536070821,-3.7986923156  
 C,0,-3.9320096704,4.2784784699,-3.0360820166  
 C,0,-2.9343428226,3.7293729539,-2.2329452894  
 O,0,1.9574609199,2.9991344285,-0.5050354937  
 N,0,-0.7657972502,-0.8550914638,0.7791025163  
 N,0,-1.3182682685,-1.2269643654,-0.1066104936  
 C,0,-0.3164115934,-0.2480979415,1.9154944231  
 C,0,-1.8070541292,1.0804998645,2.2288889432  
 C,0,-1.1442250781,2.4093517336,2.0677753225  
 C,0,0.0517121337,2.67899206,2.7410366297  
 C,0,0.6499226491,3.9269768934,2.6268750175  
 C,0,0.0616672841,4.9185076209,1.8418344495  
 C,0,-1.1442599695,4.6652282634,1.1961925679  
 C,0,-1.7563901687,3.4197954611,1.3224374578  
 C,0,-0.3697838596,-1.1823928697,3.0746590224  
 O,0,-1.0033765372,-2.2128589004,3.1159406583  
 O,0,0.3082426541,-0.6543470623,4.0911376442  
 C,0,0.2978265146,-1.4104214244,5.323135684  
 N,0,-2.8522786472,0.7594283446,1.4507044914  
 C,0,-3.7999107689,-0.3283505712,1.8725122976  
 C,0,-4.5994176194,0.049330014,3.0787560578  
 C,0,-4.7643869974,-0.9029396664,4.0914944847  
 C,0,-5.5270614127,-0.6172215601,5.2264172278  
 C,0,-6.1217641333,0.6531479916,5.3405121514  
 C,0,-5.9585389035,1.6248915764,4.3374946678  
 C,0,-5.1952562466,1.3061887914,3.2099009916  
 C,0,-5.6814818225,-1.629736714,6.295718575  
 O,0,-6.788041445,0.9701039709,6.519475557  
 C,0,-8.2099969043,0.8972296021,6.4080715896  
 C,0,-6.5742916285,2.9665447871,4.4570624056  
 C,0,-4.6941406297,-0.7322065735,0.7493101878  
 C,0,-5.5112363083,0.1986348087,0.1028561333  
 C,0,-6.3657839692,-0.1929059071,-0.9321215137  
 C,0,-6.3873545537,-1.5460349488,-1.3147814882  
 C,0,-5.5774277279,-2.4987789299,-0.6690547235  
 C,0,-4.7336839061,-2.0760708158,0.3613163189  
 C,0,-7.2216147222,0.8128283135,-1.6020293542  
 O,0,-7.2925950128,-1.9841506562,-2.2755532105  
 C,0,-6.8538466494,-1.7555240982,-3.6155559567  
 C,0,-5.626012396,-3.92813399,-1.0523913392  
 H,0,0.6120506446,0.2984115905,1.7122384173  
 H,0,-0.0853593603,-0.2045740923,-5.7349053883  
 H,0,2.7335183255,2.3512122046,2.7257755287  
 H,0,-3.4265227738,0.4113186604,-2.9658749373  
 H,0,-5.2256778524,1.4213319227,-4.3868275164  
 H,0,-5.5421956902,3.8951719815,-4.4317096687  
 H,0,-4.0591034553,5.370655792,-3.0735007613  
 H,0,-2.2484645074,4.3695703057,-1.6550882174  
 H,0,1.3774187421,7.6809378871,-1.7714869534  
 H,0,3.3581129181,9.1782049213,-1.4347901371  
 H,0,5.5250081371,8.2274364463,-0.6498512809

H,0,5.726968523,5.7808299282,-0.2002338619  
 H,0,3.758937149,4.2731207411,-0.5274066708  
 H,0,6.4997794301,2.4926235634,4.8570201823  
 H,0,7.4733125262,0.8444845525,3.2507619528  
 H,0,7.2640452015,-0.4757061517,1.1887354707  
 H,0,7.2129744364,-2.7554885384,0.4916972208  
 H,0,8.469426137,-3.9871736577,-1.2696174924  
 H,0,8.0740709469,-3.4759550271,-3.6804683827  
 H,0,6.410074854,-1.7284237209,-4.3230710485  
 H,0,5.1433439619,-0.4973936953,-2.5623564478  
 H,0,4.3150459155,-4.9200562215,-1.3078294469  
 H,0,5.0757118609,-6.472128965,0.4820184289  
 H,0,4.7589526782,-5.869507342,2.8837097408  
 H,0,3.6878070547,-3.696766965,3.4861657306  
 H,0,2.9316715951,-2.1355944948,1.6973562032  
 H,0,2.2516161876,-4.2495851364,-2.0716862522  
 H,0,1.065852877,-4.0833520293,-4.2167140776  
 H,0,-0.0754492083,-2.6807922245,-5.9402713404  
 H,0,-3.1819059894,-1.2042248484,-2.1429892237  
 H,0,-2.8569540098,1.0703053262,0.4784621796  
 H,0,-1.9332687474,0.7624447545,3.2671232374  
 H,0,0.5285569939,1.9024339436,3.3352327195  
 H,0,1.5882151178,4.124444851,3.1355030586  
 H,0,0.5459253975,5.8835174611,1.7293328997  
 H,0,-1.6050841105,5.4300714926,0.5799630237  
 H,0,-2.7079725971,3.2412181983,0.8321856256  
 H,0,-5.4961385159,1.2553562485,0.4129528369  
 H,0,-6.628163991,1.3552373195,-2.3843491201  
 H,0,-7.5998484558,1.5639282272,-0.865639301  
 H,0,-8.0984006325,0.3231297304,-2.0944757222  
 H,0,-7.7135330738,-2.1065126665,-4.2389788742  
 H,0,-5.9361265771,-2.3553630081,-3.8288762806  
 H,0,-6.6556441615,-0.6685565251,-3.7840663706  
 H,0,-4.6283788065,-4.413465263,-0.9180097898  
 H,0,-5.9418700721,-4.0397376755,-2.1198412069  
 H,0,-6.3713427352,-4.4658416555,-0.4130618558  
 H,0,-4.1016651426,-2.820063085,0.8717033216  
 H,0,-4.2958751309,-1.8959111055,3.9975593138  
 H,0,-6.6492292862,-1.4844516665,6.8380581471  
 H,0,-4.8506633432,-1.5260269396,7.038786144  
 H,0,-5.6541598136,-2.6647231625,5.8752616362  
 H,0,-8.5707251712,1.2065032606,7.4206317101  
 H,0,-8.5276171685,-0.1476156889,6.1742239908  
 H,0,-8.5770957072,1.6007558503,5.6217503948  
 H,0,-6.7558290462,3.2235364548,5.5307394821  
 H,0,-7.5548333422,2.9880347535,3.9172784408  
 H,0,-5.9114399,3.7483226741,4.0107368381  
 H,0,-5.0690097151,2.0667574465,2.4234655279  
 H,0,1.0610239297,0.9037933159,-3.7959497898  
 H,0,4.1503290435,3.2559911543,4.5946790673  
 C,0,1.1289076896,-0.6384707736,6.3222053333  
 H,0,-0.740883619,-1.529107968,5.6451317032  
 H,0,0.7079664369,-2.4027676982,5.1170864791  
 H,0,1.1545677346,-1.178828952,7.2717109228  
 H,0,2.1531429932,-0.5196737226,5.9613247878  
 H,0,0.7024647112,0.3520199349,6.4982960925

### Gauche 3a

E(RM062X) = -1385.08307588

E(RAM1) = -1.09980699019

|                                            |              |
|--------------------------------------------|--------------|
| Zero-point correction=                     | 1.284209     |
| (Hartree/Particle)                         |              |
| Thermal correction to Energy=              | 1.365603     |
| Thermal correction to Enthalpy=            | 1.366547     |
| Thermal correction to Gibbs Free Energy=   | 1.150146     |
| Sum of electronic and zero-point Energies= | -1383.444832 |

Sum of electronic and thermal Energies= -1383.363437  
 Sum of electronic and thermal Enthalpies= -1383.362493  
 Sum of electronic and thermal Free Energies= -1383.578895

|       | E (Thermal) | CV             | S              |
|-------|-------------|----------------|----------------|
|       | KCal/Mol    | Cal/Mol-Kelvin | Cal/Mol-Kelvin |
| Total | 856.929     | 307.310        | 455.455        |

C,0,-6.4855151673,-1.5609868348,1.173463165  
 C,0,-6.2817338201,-1.8610972771,-0.1813241561  
 C,0,-7.0438061498,-2.8762223881,-0.7780317967  
 C,0,-7.9848912358,-3.5816646819,-0.0307783585  
 C,0,-8.1815178638,-3.2780395866,1.3160127481  
 C,0,-7.4304658363,-2.2671488256,1.9151754972  
 C,0,-5.3496213188,-1.0628253966,-0.9847063941  
 C,0,-4.0414718228,-0.7208414882,-0.5174869175  
 C,0,-3.325415593,0.2718032237,-1.1942175348  
 C,0,-3.810265676,0.8282572347,-2.425132486  
 C,0,-5.0395065732,0.3575227878,-2.9466396728  
 C,0,-5.8053446049,-0.5628796443,-2.1892642526  
 C,0,-5.50062979,0.86155426,-4.1943549737  
 C,0,-4.7778277734,1.8112142367,-4.8735151674  
 C,0,-3.5691672505,2.3101458585,-4.3320537743  
 C,0,-3.0985268827,1.8325718352,-3.1331008405  
 C,0,-3.4754440488,-1.3448738138,0.6810004174  
 C,0,-3.0367215336,-0.534478563,1.7311735612  
 C,0,-2.6883755534,-1.0888806496,3.0063654601  
 C,0,-2.6884056758,-2.4965510883,3.153547502  
 C,0,-2.9751826151,-3.3094433116,2.0287068859  
 C,0,-3.3476511037,-2.7618769832,0.8147703226  
 C,0,-2.3654361783,-0.2702107489,4.1210805587  
 C,0,-2.0608266987,-0.8376952501,5.3349120507  
 C,0,-2.0647571916,-2.2448488355,5.4856513274  
 C,0,-2.3692985275,-3.0574357308,4.4208674538  
 O,0,-2.9679813558,0.8256523083,1.6071832276  
 B,0,-2.0191807213,1.3916359484,0.6038900752  
 O,0,-2.111731386,0.7136302544,-0.7503315  
 C,0,-3.5130103271,-3.6727111772,-0.3229300134  
 C,0,-2.9660671736,-3.3613400667,-1.5759126907  
 C,0,-3.0561065052,-4.2661420828,-2.6314240154  
 C,0,-3.6962416926,-5.4919464097,-2.4526904204  
 C,0,-4.2507518603,-5.8073748943,-1.2125722712  
 C,0,-4.1596481093,-4.906728768,-0.1532786452  
 O,0,-0.6085267426,1.1493104523,1.0134451324  
 B,0,0.0723000279,2.0809621999,1.7161292484  
 O,0,-0.37793397,3.3647768394,1.8440886459  
 B,0,-1.5307528595,3.7315623259,1.1455953204  
 O,0,-1.7756804412,5.1032667025,1.1750104144  
 C,0,-2.8674728996,5.765586246,0.6554692769  
 C,0,-3.99937815,5.1423249487,0.1168993133  
 C,0,-5.0431625012,5.9360117704,-0.3565950594  
 C,0,-4.961136129,7.3265911829,-0.2945380135  
 C,0,-3.8277912843,7.9359866592,0.2461718286  
 C,0,-2.7709489617,7.1679197481,0.7248709842  
 O,0,1.2909668083,1.6325809643,2.2819787294  
 C,0,2.0605906827,3.2120172486,3.2039846172  
 C,0,3.3389311921,1.7665392123,3.4179217618  
 C,0,4.1646995815,2.3463739982,4.3774136778  
 C,0,3.7373704826,3.4554677527,5.1071964979  
 C,0,2.470926796,3.9933474218,4.8781205457  
 C,0,1.6224962492,3.4283798741,3.9280408176  
 O,0,-2.2848758215,2.813869005,0.5177924426  
 N,0,0.6811147666,-0.9369696463,0.4217468988  
 N,0,0.7823983982,-1.3745285926,1.4226704084  
 C,0,0.6987571556,-0.4061508308,-0.9125926009  
 C,0,1.989434856,0.5788085145,-1.0662521412  
 C,0,1.5601839951,2.0405909578,-1.055846233  
 C,0,0.4126444212,2.4475232315,-1.7393358057  
 C,0,0.0300288782,3.7853699672,-1.7458669464  
 C,0,0.8018860326,4.7386432279,-1.0835901735

C,0,1.9679217546,4.3448764848,-0.4345513411  
 C,0,2.3491407756,3.0043015937,-0.4230988547  
 C,0,0.7257544073,-1.6174069725,-1.8426311612  
 O,0,0.8970487925,-2.7574490205,-1.4942664781  
 O,0,0.5316415666,-1.1842684099,-3.0753109727  
 C,0,0.4964236797,-2.2008133011,-4.110728161  
 N,0,3.0440884609,0.3066783148,-0.1538331406  
 C,0,3.7675877344,-0.9947243771,-0.2984882596  
 C,0,4.5330565446,-1.0886260866,-1.5828794164  
 C,0,4.5569523658,-2.3149612591,-2.2579283275  
 C,0,5.2796719267,-2.4678192425,-3.4431741236  
 C,0,5.9798067218,-1.3601886056,-3.9562954838  
 C,0,5.9628809479,-0.1200494,-3.2946818693  
 C,0,5.2366948022,-0.0006055375,-2.1049087496  
 C,0,5.2835900248,-3.7684173656,-4.1509984669  
 O,0,6.6054102425,-1.485696219,-5.1926752897  
 C,0,8.0180349146,-1.6717970549,-5.0996769919  
 C,0,6.6929648835,1.0505405291,-3.8334559755  
 C,0,4.6878822399,-1.2198949093,0.8588071401  
 C,0,5.6021367753,-0.2391725269,1.2525750717  
 C,0,6.4776776622,-0.4615142069,2.3200089225  
 C,0,6.4168570833,-1.6912182688,2.9990734225  
 C,0,5.5069565912,-2.6926475515,2.6118618616  
 C,0,4.6486351208,-2.4421846282,1.538242291  
 C,0,7.4495035633,0.5866370662,2.7078843698  
 O,0,7.3333085649,-1.979784965,4.0050309817  
 C,0,6.9862131159,-1.4120720107,5.2687681776  
 C,0,5.4699871428,-3.9987616483,3.3081842982  
 H,0,-0.2661346596,0.1173632324,-1.0134267843  
 H,0,-1.8158361681,-0.2069501065,6.2016743868  
 H,0,-2.1742334584,2.2269769254,-2.6812394817  
 H,0,3.6762675173,0.8955581096,2.8386645669  
 H,0,5.1638111797,1.9216348272,4.5573374545  
 H,0,4.3985178989,3.9056210921,5.8610525338  
 H,0,2.1338304033,4.8707694773,5.4503243098  
 H,0,0.625114131,3.8573025974,3.7379400515  
 H,0,-1.8745556743,7.6317883767,1.1576299926  
 H,0,-3.7655596549,9.0329617973,0.26962318533  
 H,0,-5.7892942895,7.9439762622,-0.6966819862  
 H,0,-5.9371724904,5.4551208884,-0.7808418541  
 H,0,-4.058588999,4.042235577,0.07100592  
 H,0,-5.1331990955,2.2025804716,-5.8379340736  
 H,0,-6.4498582954,0.4782794606,-4.5970936191  
 H,0,-6.8017993297,-0.8468840267,-2.5621250403  
 H,0,-6.8907987242,-3.1192393596,-1.8401238928  
 H,0,-8.5746494925,-4.3781884196,-0.5069003068  
 H,0,-8.9272624351,-3.8327480565,1.9030806365  
 H,0,-7.5828252908,-2.0228885208,2.9766894217  
 H,0,-5.8896549608,-0.764075143,1.6471761036  
 H,0,-4.6091957959,-5.1566338305,0.8199110885  
 H,0,-4.7644204562,-6.7691733927,-1.0686339535  
 H,0,-3.7673235608,-6.2048306734,-3.286464226  
 H,0,-2.6238267954,-4.0082733506,-3.6091182431  
 H,0,-2.4779923705,-2.3859685356,-1.7254364819  
 H,0,-2.8836268825,-4.4011885237,2.1378738321  
 H,0,-2.3806306543,-4.1518216677,4.5298718599  
 H,0,-1.8240510759,-2.6770804329,6.4681123331  
 H,0,3.045387478,-1.8383244065,-0.3014272112  
 H,0,2.828569769,0.5632781747,0.8084136305  
 H,0,2.3408708611,0.3263347996,-2.0777605314  
 H,0,-0.2142696657,1.7232434356,-2.2522535172  
 H,0,-0.8862674959,4.0766095665,-2.2500978937  
 H,0,0.4872085878,5.7769357033,-1.0634018881  
 H,0,2.5779326369,5.0787411885,0.0827854662  
 H,0,3.2589669918,2.7041288013,0.0844423969  
 H,0,5.6472765481,0.718452947,0.7091170266  
 H,0,6.9571145099,1.339372807,3.3751482285  
 H,0,7.8358319561,1.1202543424,1.8046154611  
 H,0,8.3161338594,0.1394927503,3.2560734906  
 H,0,7.8442754392,-1.6912516078,5.9295534705

H,0,6.0332676279,-1.8576372114,5.6440244548  
H,0,6.890082488,-0.3017880851,5.1870301901  
H,0,4.4408363195,-4.4337153739,3.292389797  
H,0,5.7998484176,-3.8875030219,4.3714741251  
H,0,6.166304195,-4.7157617907,2.8037396166  
H,0,3.9441151119,-3.2286397513,1.2252561198  
H,0,4.0069754208,-3.1791265093,-1.851998893  
H,0,6.2176658115,-3.8852546291,-4.7555291625  
H,0,4.4110024674,-3.823156219,-4.8499408906  
H,0,5.2119930077,-4.617877559,-3.4283694551  
H,0,8.3496059886,-1.7225174154,-6.1666489662  
H,0,8.2495495945,-2.6247891848,-4.5653107908  
H,0,8.4926353582,-0.8069987307,-4.575324807  
H,0,6.8374161391,0.9520572128,-4.9384405855  
H,0,7.6998158083,1.1299524551,-3.3505827342  
H,0,6.1314029398,1.9955636607,-3.6298642822  
H,0,5.2242467886,0.9691934591,-1.5820427141  
H,0,-2.3781218891,0.8230714519,3.9815863413  
H,0,-3.0200549081,3.0897015863,-4.879313028  
C,0,0.2714924644,-1.4865941141,-5.4225549917  
H,0,1.4447328987,-2.744398857,-4.0840545191  
H,0,-0.3119171868,-2.8960876031,-3.8658751346  
H,0,0.232405834,-2.219722654,-6.2318653323  
H,0,-0.6714089987,-0.9356696181,-5.4060759356  
H,0,1.085224513,-0.7872050267,-5.6276110466

### TS<sub>conf</sub>

E(RM062X) = -1385.08063867

E(RAM1) = -1.11442946535

Zero-point correction= 1.284438  
(Hartree/Particle)  
Thermal correction to Energy= 1.365075  
Thermal correction to Enthalpy= 1.366019  
Thermal correction to Gibbs Free Energy= 1.152010  
Sum of electronic and zero-point Energies= -1383.442529  
Sum of electronic and thermal Energies= -1383.361892  
Sum of electronic and thermal Enthalpies= -1383.360948  
Sum of electronic and thermal Free Energies= -1383.574957

|       | E (Thermal)<br>KCal/Mol | CV<br>Cal/Mol-Kelvin | S<br>Cal/Mol-Kelvin |
|-------|-------------------------|----------------------|---------------------|
| Total | 856.597                 | 305.156              | 450.419             |

C,0,-5.9784719904,-0.8522724152,1.1744461245  
C,0,-5.6654201532,-1.6811243915,0.0870925871  
C,0,-6.4655785348,-2.8046213817,-0.1675879504  
C,0,-7.5520607903,-3.0961944508,0.6546639477  
C,0,-7.8566749352,-2.2678700626,1.7343929937  
C,0,-7.0680978891,-1.1467434622,1.9915835564  
C,0,-4.5723910319,-1.3247687857,-0.8235377183  
C,0,-3.302762444,-0.8707103972,-0.3460614858  
C,0,-2.4339602615,-0.2601566903,-1.2511020417  
C,0,-2.7058112999,-0.2421216376,-2.6561120375  
C,0,-3.9009777865,-0.8411745483,-3.1216507961  
C,0,-4.8332480383,-1.3434691187,-2.1806978771  
C,0,-4.1604217786,-0.8684060962,-4.5201070064  
C,0,-3.2795826196,-0.2956370582,-5.4041079013  
C,0,-2.1047353158,0.3382697055,-4.9331322142  
C,0,-1.8237326673,0.3647300551,-3.588798553  
C,0,-2.9272785821,-0.9754533852,1.0666450687  
C,0,-2.539698881,0.1799436521,1.752047904  
C,0,-2.3191213234,0.1698724669,3.1683439791  
C,0,-2.4015443334,-1.0640923502,3.8563526628  
C,0,-2.6648020797,-2.2480186468,3.1248853908  
C,0,-2.9205494463,-2.2209027415,1.7656048382

C,0,-2.039395295,1.3572188735,3.8962251668  
C,0,-1.8482862183,1.31071948,5.2560039595  
C,0,-1.9287140396,0.0773725249,5.9458356968  
C,0,-2.1974875173,-1.0841098161,5.264052047  
O,0,-2.4048117596,1.379945153,1.113655095  
B,0,-1.3551843451,1.5228556476,0.0505940747  
O,0,-1.250769992,0.3081675873,-0.8390681237  
C,0,-3.1229176473,-3.5065908039,1.0883641647  
C,0,-2.4985076779,-3.7917129567,-0.1338298115  
C,0,-2.6752412432,-5.0332272121,-0.7424410027  
C,0,-3.4615124778,-6.010533168,-0.1337094059  
C,0,-4.0789358811,-5.7390462438,1.0868452448  
C,0,-3.9139674197,-4.496131061,1.6939282834  
O,0,-0.0098687254,1.6399353438,0.6744199273  
B,0,0.3314176745,2.8520200088,1.1914625574  
O,0,-0.2437062624,4.0073984185,0.7328701813  
B,0,-1.1991808793,3.9251256946,-0.2819189444  
O,0,-1.546684797,5.1629700742,-0.8122455828  
C,0,-2.489958278,5.4167296522,-1.7854716075  
C,0,-3.4017726606,4.4754253642,-2.2772388717  
C,0,-4.3258820374,4.8744695021,-3.2417850382  
C,0,-4.3408768924,6.1884019727,-3.7082811829  
C,0,-3.4260572664,7.1173787723,-3.2098542282  
C,0,-2.4919466129,6.7456769427,-2.2478782258  
O,0,1.3093230317,2.829164736,2.1945455451  
C,0,1.8350043639,3.892010497,2.899765733  
C,0,2.6847423873,3.5174382309,3.9568741717  
C,0,3.2860239883,4.5136261938,4.7202064635  
C,0,3.0468027476,5.8605923597,4.4446481382  
C,0,2.1964869682,6.2177486535,3.3988697506  
C,0,1.582495522,5.2397138946,2.617562325  
O,0,-1.6670200767,2.7312541799,-0.6892819431  
N,0,1.5401803674,-0.1832969402,1.5492212004  
N,0,1.7692952386,0.1514567291,2.568851592  
C,0,1.339047493,-0.7366789479,0.2279460375  
C,0,2.0352299467,0.1421786301,-0.9196268201  
C,0,2.9758960589,1.2015347239,-0.3962134199  
C,0,2.7824040327,2.5328912937,-0.7668191234  
C,0,3.688544956,3.5115492135,-0.365776696  
C,0,4.7902580279,3.1645028009,0.4139564645  
C,0,4.9879512322,1.8355949184,0.7880457774  
C,0,4.0875052433,0.8542878056,0.379960393  
C,0,1.9455592786,-2.1420307481,0.2936802072  
O,0,2.9316026358,-2.4017260277,0.9383084281  
O,0,1.2378594979,-2.9682883684,-0.4442632632  
C,0,1.8196468621,-4.2802997174,-0.6386839525  
N,0,2.6955960223,-0.791092647,-1.8194464489  
C,0,2.1801274485,-0.8261583789,-3.2256126701  
C,0,2.61236984,0.3387595627,-4.065535334  
C,0,1.6499484594,1.079714235,-4.7571580569  
C,0,2.0143711561,2.1672109534,-5.5565921128  
C,0,3.3754318168,2.5062843196,-5.6569461834  
C,0,4.3591529686,1.7725054159,-4.9700713598  
C,0,3.9604615999,0.6917122793,-4.1789477565  
C,0,0.9761386884,2.9566295209,-6.2574053194  
O,0,3.7289182839,3.6496115475,-6.367166449  
C,0,4.2173070693,3.3737409371,-7.6799002493  
C,0,5.7937299922,2.1256894404,-5.0732660438  
C,0,2.5391924385,-2.1040552764,-3.9160662665  
C,0,3.8472233744,-2.5946616623,-3.9286911037  
C,0,4.1687070328,-3.7716474276,-4.6127203229  
C,0,3.1478484754,-4.4574453118,-5.2924095891  
C,0,1.8217663674,-3.9873679454,-5.279541911  
C,0,1.5319192864,-2.8109969798,-4.5841251097  
C,0,5.5630993216,-4.2705787118,-4.6164328082  
O,0,3.4598606443,-5.5598754677,-6.0834571796  
C,0,3.5095703785,-6.7841194423,-5.3524124189  
C,0,0.7533734245,-4.7238936101,-5.9929710442  
H,0,0.2502900861,-0.7231020872,0.0673311284  
H,0,-1.6373731295,2.2290592195,5.8230322404



H,0,-0.9291356859,0.8704998553,-3.1904358054  
H,0,2.8595891565,2.4551501543,4.1702442285  
H,0,3.9513999727,4.2321886255,5.5497740583  
H,0,3.5252446648,6.6389649586,5.055753132  
H,0,2.0017187428,7.2796179403,3.1859304535  
H,0,0.9010484241,5.5203470369,1.7978216364  
H,0,-1.7675351733,7.464974692,-1.8430229316  
H,0,-3.440155884,8.1538136557,-3.5777991455  
H,0,-5.0739022276,6.4942717149,-4.4677693643  
H,0,-5.0477204563,4.1423333865,-3.6332533695  
H,0,-3.3831526888,3.4381458889,-1.9044906368  
H,0,-3.4803733726,-0.3120298223,-6.4853348588  
H,0,-5.0839850383,-1.3500562597,-4.873981196  
H,0,-5.8013424361,-1.7158255899,-2.5505566723  
H,0,-6.2276101407,-3.4619610432,-1.0171596381  
H,0,-8.1708234106,-3.9814459538,0.4486906854  
H,0,-8.7166267079,-2.4971186637,2.3797208942  
H,0,-7.3051947235,-0.4892506054,2.8408347906  
H,0,-5.3539252126,0.0327874392,1.3783733142  
H,0,-4.420357007,-4.2801153188,2.6472027645  
H,0,-4.7041259119,-6.5042475888,1.569657073  
H,0,-3.5989234104,-6.9887443162,-0.6161106594  
H,0,-2.2025216728,-5.2369437543,-1.7145507271  
H,0,-1.8770689707,-3.02271885,-0.6197264109  
H,0,-2.6585173649,-3.2067273851,3.6662761316  
H,0,-2.2705230215,-2.0460247679,5.792411823  
H,0,-1.7783394756,0.0645527239,7.0354757977  
H,0,1.0814984643,-0.7959871246,-3.1311770962  
H,0,3.7002188184,-0.6455561147,-1.8017319834  
H,0,1.1806752464,0.6204170141,-1.4044040782  
H,0,1.9182949485,2.8015623973,-1.3690846201  
H,0,3.5266048752,4.5446643945,-0.6563009574  
H,0,5.4925717631,3.9283464004,0.7330831735  
H,0,5.8443104896,1.5624243598,1.3967716789  
H,0,4.2500847483,-0.184519925,0.6680422705  
H,0,4.6498866624,-2.0525024546,-3.4060560415  
H,0,5.7560161301,-4.8769667237,-3.6955363246  
H,0,6.2887875029,-3.4206294336,-4.6352275996  
H,0,5.748267521,-4.9178287133,-5.5100182742  
H,0,3.7866469065,-7.54505942,-6.1237745062  
H,0,2.5094897617,-7.012549723,-4.9103088349  
H,0,4.2864797954,-6.7278623942,-4.5513318789  
H,0,-0.1440524767,-4.0788441726,-6.1564852399  
H,0,0.4439517093,-5.6184934251,-5.3953061077  
H,0,1.1264194036,-5.0820831217,-6.9852326561  
H,0,0.4958987474,-2.435853005,-4.5722077419  
H,0,0.5840648729,0.8064468366,-4.6809821287  
H,0,1.395738727,3.431171689,-7.1792977899  
H,0,0.6041228015,3.7723791397,-5.5864589549  
H,0,0.1083887252,2.3126024352,-6.5438670927  
H,0,4.4638517187,4.3848282305,-8.0894904606  
H,0,3.4265214533,2.878258318,-8.2934467377  
H,0,5.1295386928,2.7306139503,-7.6293961095  
H,0,5.9161636671,3.2037103677,-5.3463313761  
H,0,6.2859114777,1.5028918244,-5.8626158554  
H,0,6.3184710416,1.9417068377,-4.1036309544  
H,0,4.7326268418,0.1126339176,-3.6493898374  
H,0,-1.9919385506,2.3073828232,3.339096671  
H,0,-1.43145091,0.8182248453,-5.6589248477  
C,0,0.9328840282,-5.0137302757,-1.6162404165  
H,0,2.8358998723,-4.1377801454,-1.0170934397  
H,0,1.8743500462,-4.7751562203,0.3348080716  
H,0,1.3226011148,-6.0216260409,-1.7779082199  
H,0,-0.0865203438,-5.0906174256,-1.2266625116  
H,0,0.906033098,-4.4897897863,-2.5770290264

E(RAM1) = -0.766607128196

E(RM062X) = -1385.08572471

E(RAM1) = -1.12012104302

Zero-point correction= 1.285025  
(Hartree/Particle)  
Thermal correction to Energy= 1.366090  
Thermal correction to Enthalpy= 1.367034  
Thermal correction to Gibbs Free Energy= 1.155075  
Sum of electronic and zero-point Energies= -1383.447186  
Sum of electronic and thermal Energies= -1383.366121  
Sum of electronic and thermal Enthalpies= -1383.365177  
Sum of electronic and thermal Free Energies= -1383.577135

|       | E (Thermal) | CV             | S              |
|-------|-------------|----------------|----------------|
|       | KCal/Mol    | Cal/Mol-Kelvin | Cal/Mol-Kelvin |
| Total | 857.234     | 307.129        | 446.105        |

C,0,-5.8820607497,-1.43222248,1.4730279191  
C,0,-5.7283918074,-0.0393609831,1.5289363805  
C,0,-6.8687936594,0.775937276,1.4817890467  
C,0,-8.1363337096,0.2076359558,1.3721432612  
C,0,-8.28116132,-1.178233391,1.3160095408  
C,0,-7.1522129048,-1.9954388331,1.3668679916  
C,0,-4.4013636583,0.5526376521,1.7285428514  
C,0,-3.2549483239,0.125626004,0.98571434  
C,0,-1.9950268073,0.5247954022,1.4280444766  
C,0,-1.8313200421,1.4542738885,2.503471828  
C,0,-2.9905345657,1.9786439009,3.123844374  
C,0,-4.2619114,1.4869608295,2.736970069  
C,0,-2.8437682473,2.9433792872,4.1586833263  
C,0,-1.5948825965,3.3399756338,4.5698443625  
C,0,-0.4361404123,2.7827708211,3.977410283  
C,0,-0.5514832225,1.8561119097,2.9696243683  
C,0,-3.3845024832,-0.759624087,-0.1740235209  
C,0,-2.6740538474,-1.9634240496,-0.2115936346  
C,0,-2.9770467456,-2.9732986691,-1.1875570417  
C,0,-3.9218177729,-2.6768506367,-2.1985927095  
C,0,-4.4884790532,-1.3796085116,-2.2551912062  
C,0,-4.2272896572,-0.4329286125,-1.2815419125  
C,0,-2.3877603379,-4.2648203093,-1.1391757249  
C,0,-2.7301913974,-5.2200887215,-2.0659528973  
C,0,-3.6735150585,-4.9253674673,-3.0788642019  
C,0,-4.2554633546,-3.6828901828,-3.1468084533  
O,0,-1.703219771,-2.2832090605,0.6872547259  
B,0,-0.5278520173,-1.3839200931,0.9653742725  
O,0,-0.8497572136,0.0751334122,0.8116321075  
C,0,-4.7675067308,0.916451227,-1.4796396194  
C,0,-3.9689023942,2.0478997072,-1.2591669569  
C,0,-4.462152544,3.3235867615,-1.5253280234  
C,0,-5.7587697909,3.4869636298,-2.0120285074  
C,0,-6.5631702128,2.3682220158,-2.2270247483  
C,0,-6.0728066052,1.0906243947,-1.9649338843  
O,0,0.5401816462,-1.6091753632,-0.0438029364  
B,0,1.5074154386,-2.5263225565,0.1912187054  
O,0,1.7189025436,-3.0635200146,1.4314893466  
B,0,0.938755189,-2.6085526734,2.4970786135  
O,0,1.3400352645,-3.1184822352,3.7264052168  
C,0,0.7407588152,-2.9183988376,4.9526496697  
C,0,-0.4548992519,-2.2193559127,5.1530950551  
C,0,-0.9581312889,-2.1058679674,6.4484411436  
C,0,-0.2816969158,-2.6793218975,7.5243479784  
C,0,0.9094975897,-3.3748791179,7.3104548796  
C,0,1.4345818128,-3.5028623725,6.0282923436  
O,0,2.2886420904,-2.8726616824,-0.9292061784  
C,0,3.3756432447,-3.7251859597,-0.9152941436  
C,0,3.6690922575,-4.3332645311,-2.1479575215  
C,0,4.7974705613,-5.1432203427,-2.2458876326

## Anti 3a

anti-3a-ONIOM-M06-BB

C,0,5.6161575384,-5.3558666492,-1.1363721243  
 C,0,5.3066954751,-4.7563613756,0.0845106589  
 C,0,4.1859997123,-3.937139482,0.2071649841  
 O,0,-0.0571976527,-1.7301376569,2.2912790077  
 N,0,-0.2793051965,-1.0988954108,-2.4209676453  
 N,0,-0.5045492917,-2.1233964676,-2.7481794854  
 C,0,0.1078704768,0.2554909694,-2.1351552103  
 C,0,1.73419064,0.3696477462,-2.3064283992  
 C,0,2.0686030888,0.0200698972,-3.7410109506  
 C,0,2.3249142215,-1.3139582229,-4.0687552692  
 C,0,2.5486884021,-1.6834543476,-5.3949518195  
 C,0,2.52161011,-0.7220280455,-6.402170311  
 C,0,2.2860185416,0.6143691216,-6.0771840666  
 C,0,2.0626425501,0.9854817117,-4.7536466874  
 C,0,-0.5685576352,1.1749063036,-3.1425602879  
 O,0,-0.4929752997,2.3697662994,-3.0169896883  
 O,0,-1.1184259111,0.5222720086,-4.1540959847  
 C,0,-1.6224244014,1.3368123811,-5.2421316267  
 N,0,2.1863299841,1.6480105871,-1.8963840885  
 C,0,2.2408860595,1.9075175748,-0.4141480323  
 C,0,3.4265144492,1.2510556722,0.2195048912  
 C,0,3.2414446931,0.5008536325,1.3851910475  
 C,0,4.3207110652,-0.1266534764,2.015656926  
 C,0,5.6038273921,0.0160224601,1.4589365223  
 C,0,5.8094194457,0.7682783257,0.2887492541  
 C,0,4.709581129,1.3782423267,-0.320721824  
 C,0,4.0905843069,-0.9265994136,3.2403865017  
 O,0,6.6939332381,-0.524667309,2.1361704939  
 C,0,7.1238192607,-1.7762983328,1.6017815087  
 C,0,7.159842139,0.9178638853,-0.3007416335  
 C,0,2.2589261585,3.3810047956,-0.1515696098  
 C,0,3.1447112578,4.2301724645,-0.8220760035  
 C,0,3.1630414459,5.6032326677,-0.5601318597  
 C,0,2.2693247288,6.1215927858,0.3933089989  
 C,0,1.3658080336,5.2847808456,1.0724696148  
 C,0,1.3696405625,3.9169426771,0.7852809157  
 C,0,4.1133627123,6.4811117349,-1.2810012105  
 O,0,2.1940836113,7.4954834456,0.6050177767  
 C,0,3.1949958718,7.9863614139,1.4963962782  
 C,0,0.407580209,5.8363712702,2.0572216701  
 H,0,-0.1975534355,0.4386703975,-1.0927140603  
 H,0,-2.2840817015,-6.2244754792,-2.024863811  
 H,0,0.3351561477,1.3871812033,2.5117382718  
 H,0,3.0146455033,-4.1673850915,-3.0136213519  
 H,0,5.0386930096,-5.622277307,-3.2062626319  
 H,0,6.5019976272,-6.0009104024,-1.2237880401  
 H,0,5.9470794442,-4.9312368073,0.9621540015  
 H,0,3.923981253,-3.4753901762,1.1733850515  
 H,0,2.3689265,-4.0492815082,5.8424698819  
 H,0,1.4412986867,-3.8276917256,8.1601520024  
 H,0,-0.6859727867,-2.5848219104,8.5419146737  
 H,0,-1.8973591936,-1.5581677388,6.6164583923  
 H,0,-0.9847467927,-1.7683175881,4.2981790984  
 H,0,-1.4789943156,4.0854714593,5.3702332175  
 H,0,-3.7504986471,3.3578404285,4.6236546213  
 H,0,-5.1482097117,1.8359722001,3.2898756205  
 H,0,-6.7583321627,1.8698288767,1.525292589  
 H,0,-9.0238373136,0.8556024624,1.3327506759  
 H,0,-9.2822407895,-1.6251191107,1.2343027835  
 H,0,-7.2613160287,-3.0890930134,1.3255622655  
 H,0,-4.989971171,-2.077769477,1.5119118742  
 H,0,-6.7174183238,0.2125250353,-2.122830107  
 H,0,-7.5901515555,2.4926182087,-2.6005019287  
 H,0,-6.1472051292,4.4943685126,-2.2197258639  
 H,0,-3.8254628474,4.2025304648,-1.3453854232  
 H,0,-2.951395921,1.9252674797,-0.855658157  
 H,0,-5.1475744894,-1.1348057025,-3.1022415885  
 H,0,-4.9980770507,-3.4479134548,-3.9234605792  
 H,0,-3.9389335598,-5.7078099484,-3.8052941278  
 H,0,1.3316479377,1.4938436129,0.0682415556

H,0,1.7409299805,2.4187088023,-2.3840712547  
 H,0,2.1186852913,-0.3974832774,-1.6265856948  
 H,0,2.3665784037,-2.057293576,-3.273847359  
 H,0,2.7517169281,-2.7220450457,-5.6363968056  
 H,0,2.6984417664,-1.0079414802,-7.4342628397  
 H,0,2.2858337392,1.3715180869,-6.8555444421  
 H,0,1.8978650504,2.0330287084,-4.5143879702  
 H,0,3.8475699092,3.8209609518,-1.5645455991  
 H,0,3.7347910021,7.5333660091,-1.3103060947  
 H,0,4.263375782,6.1262277264,-2.3302591224  
 H,0,5.1064818324,6.4768719752,-0.7643534363  
 H,0,3.0000538927,9.0868640411,1.5358124318  
 H,0,4.2149346945,7.7765287833,1.0913242962  
 H,0,3.0767176296,7.5253992343,2.5067810181  
 H,0,0.1143300998,5.0615678559,2.8104315964  
 H,0,-0.5164914966,6.1854930045,1.5306315901  
 H,0,0.8532170291,6.7130402858,2.5900694359  
 H,0,0.6600735348,3.2591471022,1.3164462881  
 H,0,2.2318840147,0.3834592834,1.8145441168  
 H,0,5.0289539611,-1.4387941391,3.5675425432  
 H,0,3.3025156309,-1.7042871901,3.0560290514  
 H,0,3.7417449246,-0.2650552424,4.0723062988  
 H,0,7.9439862201,-2.0938532665,2.2922875717  
 H,0,7.5091442409,-1.6384288374,0.5617910074  
 H,0,6.2865330319,-2.5178053834,1.6077694704  
 H,0,7.3197058988,0.1446763865,-1.09427491  
 H,0,7.948452023,0.7885060919,0.4820582186  
 H,0,7.2801160637,1.9272133948,-0.7655675356  
 H,0,4.8649474954,1.9625790806,-1.2406396848  
 H,0,-1.6698440354,-4.4778825709,-0.3297892243  
 H,0,0.5539779336,3.0938922242,4.3415152682  
 C,0,-1.9631411567,0.3945519225,-6.3723770646  
 H,0,-2.4890254467,1.8927724225,-4.8742166662  
 H,0,-0.8386335544,2.048634317,-5.5151505224  
 H,0,-2.3528656816,0.9658535193,-7.2182802596  
 H,0,-1.0713754263,-0.1472023899,-6.6976862513  
 H,0,-2.7234580945,-0.3264976813,-6.0630236757

## TS 2

cis-RC-TS7-ONIOM-M06-BB  
 E(RM062X) = -1385.06957582

E(RAM1) = -1.08984926175

|                                              |              |
|----------------------------------------------|--------------|
| Zero-point correction=                       | 1.282303     |
| (Hartree/Particle)                           |              |
| Thermal correction to Energy=                | 1.364231     |
| Thermal correction to Enthalpy=              | 1.365175     |
| Thermal correction to Gibbs Free Energy=     | 1.147260     |
| Sum of electronic and zero-point Energies=   | -1383.434314 |
| Sum of electronic and thermal Energies=      | -1383.352386 |
| Sum of electronic and thermal Enthalpies=    | -1383.351442 |
| Sum of electronic and thermal Free Energies= | -1383.569357 |

|       | E (Thermal) | CV             | S              |
|-------|-------------|----------------|----------------|
|       | KCal/Mol    | Cal/Mol-Kelvin | Cal/Mol-Kelvin |
| Total | 856.068     | 307.376        | 458.640        |

C,0,-5.3619236834,-2.4856089182,1.9257238108  
 C,0,-5.5696094276,-1.0994337583,1.979666176  
 C,0,-6.8480166752,-0.6124167657,2.2895239963  
 C,0,-7.8979541466,-1.4954066016,2.5334568433  
 C,0,-7.6837507446,-2.8722368526,2.4778174354  
 C,0,-6.4147078035,-3.3641386727,2.1736502934  
 C,0,-4.4447411423,-0.1756878713,1.8017143968  
 C,0,-3.4653608816,-0.3635496739,0.7745717266  
 C,0,-2.2653493464,0.3397615642,0.8741871476  
 C,0,-2.0931543057,1.4040788246,1.8165125785  
 C,0,-3.1499026138,1.6822252603,2.7169680284

C,0,-4.292589064,0.8438646424,2.721427994  
 C,0,-3.0181952344,2.7704100883,3.6229923434  
 C,0,-1.8781348698,3.5359947719,3.6325151006  
 C,0,-0.8125781384,3.2416350175,2.7488438246  
 C,0,-0.9145732574,2.194478021,1.8651920933  
 C,0,-3.6908854394,-1.290372759,-0.337560619  
 C,0,-2.7599736017,-2.2975112824,-0.6038431139  
 C,0,-3.0285715867,-3.3309748585,-1.562185299  
 C,0,-4.223911915,-3.2596277285,-2.3156933153  
 C,0,-5.0900455573,-2.1528782302,-2.1352711876  
 C,0,-4.8381417208,-1.1820046205,-1.1836463694  
 C,0,-2.1427294337,-4.4231454658,-1.7604366112  
 C,0,-2.4436655242,-5.4055290118,-2.6730818635  
 C,0,-3.6400774316,-5.3376727246,-3.425636241  
 C,0,-4.5107368569,-4.2892050871,-3.2538903022  
 O,0,-1.5816802412,-2.3961343284,0.0750855886  
 B,0,-0.5876107206,-1.2762824239,0.0792651139  
 O,0,-1.2111129827,0.0872253704,0.0278051879  
 C,0,-5.7463728698,-0.0307132122,-1.1341092702  
 C,0,-5.2517603882,1.2776493786,-1.0394388314  
 C,0,-6.1240084417,2.3647785939,-1.0509877384  
 C,0,-7.4988384435,2.162278636,-1.1644476754  
 C,0,-8.0000930206,0.864496362,-1.2611628659  
 C,0,-7.1323074523,-0.2252902641,-1.2459428202  
 O,0,0.2591461925,-1.3254097625,-1.1444456083  
 B,0,1.2562078692,-2.2420032399,-1.1722409671  
 O,0,1.7516471037,-2.8049156601,-0.0251307232  
 B,0,1.2765297118,-2.3401389988,1.2044788116  
 O,0,2.015487809,-2.8048850156,2.2878202052  
 C,0,1.7792354889,-2.5583975366,3.6238668633  
 C,0,0.64481039,-1.9112422318,4.127473971  
 C,0,0.5204626825,-1.7475258443,5.5063647495  
 C,0,1.5094825649,-2.2200167468,6.36827612  
 C,0,2.6355031957,-2.8644222503,5.8533923663  
 C,0,2.7854645832,-3.0403462487,4.481255402  
 O,0,1.793322564,-2.5118328427,-2.4449735535  
 C,0,2.7933305044,-3.4060815347,-2.7654532564  
 C,0,2.9590935833,-3.6123686812,-4.1479386107  
 C,0,3.9605499369,-4.4735962549,-4.5851449764  
 C,0,4.7855444939,-5.1265318058,-3.6681470022  
 C,0,4.6075088042,-4.9188427855,-2.3011016492  
 C,0,3.6115271181,-4.0604170008,-1.8367167076  
 O,0,0.2441821979,-1.4816439402,1.2576064288  
 N,0,-1.0121621001,0.1343375153,-3.0746276678  
 N,0,-1.5309849718,-0.6900363424,-3.5773519022  
 C,0,0.0781035792,1.3441462078,-2.3593116251  
 C,0,1.4739590983,0.9901093277,-2.8246520247  
 C,0,1.7233720575,1.0425180458,-4.3151138715  
 C,0,1.6490089603,-0.1659287256,-5.017057453  
 C,0,1.83191096,-0.1908126389,-6.3978180764  
 C,0,2.1003279716,0.9902484717,-7.0875108718  
 C,0,2.187211194,2.194220169,-6.3907288816  
 C,0,1.9958718519,2.2240244888,-5.0105205278  
 C,0,-0.5419720835,2.6467393816,-2.8740773919  
 O,0,0.1060493928,3.6410574316,-3.0776063872  
 O,0,-1.8487154801,2.5331803829,-3.0486556745  
 C,0,-2.5313369393,3.7260448652,-3.5128363639  
 N,0,2.0626505144,1.9785645353,-1.9475033629  
 C,0,2.9759643052,1.4983144369,-0.8675978735  
 C,0,4.2848159844,0.9600917259,-1.3576989698  
 C,0,4.7628380658,-0.2381385248,-0.8182047867  
 C,0,5.9921262156,-0.769506315,-1.2216724001  
 C,0,6.7439891802,-0.0750889698,-2.1848601888  
 C,0,6.275567325,1.1273158293,-2.7451548762  
 C,0,5.0460755204,1.6343111497,-2.316953294  
 C,0,6.4662997233,-2.0436461636,-0.6347303688  
 O,0,8.0171554371,-0.5314573198,-2.5149837178  
 C,0,8.031636947,-1.3724803544,-3.6684634083  
 C,0,7.0621040026,1.8501304572,-3.7709220519  
 C,0,3.203858732,2.5626756597,0.1556883003  
 C,0,3.7305033281,3.8097052552,-0.1932262883  
 C,0,3.9674069533,4.7863741267,0.777427256  
 C,0,3.6673547537,4.4918997343,2.1200041975  
 C,0,3.1350553828,3.2443206751,2.4896654425  
 C,0,2.8971844711,2.2921872853,1.4928364806  
 C,0,4.5285812614,6.0999021512,0.3863080192  
 O,0,3.7996441845,5.4819364862,3.0895320754  
 C,0,5.1267367613,5.5965966831,3.603186132  
 C,0,2.8074626634,2.9270437977,3.8986389797  
 H,0,-0.163742682,1.0713292881,-1.3270842244  
 H,0,-1.7625273225,-6.25521178,-2.8251028268  
 H,0,-0.0866460215,1.9382927799,1.1852044845  
 H,0,2.3003442709,-3.0989277535,-4.8609701704  
 H,0,4.0966050186,-4.6426975024,-5.6635341681  
 H,0,5.5706056775,-5.8083201054,-4.0243803642  
 H,0,5.2529280005,-5.4377429705,-1.5764427692  
 H,0,3.4621698693,-3.9089298826,-0.7551318596  
 H,0,3.6629525292,-3.5492503265,4.0605069478  
 H,0,3.4134264213,-3.2390553704,6.5347959312  
 H,0,1.4022641129,-2.0875772585,7.453981368  
 H,0,-0.3687547383,-1.2422465191,5.911891177  
 H,0,-0.1339160906,-1.5414382321,3.4402748096  
 H,0,-1.7760058982,4.3812118413,4.3288738045  
 H,0,-3.8478390636,2.9827247905,4.3134570309  
 H,0,-5.053753924,1.0014751889,3.501398204  
 H,0,-7.0222954384,0.4731199969,2.3318750692  
 H,0,-8.8970840916,-1.103272551,2.7720082167  
 H,0,-8.5123091851,-3.5674999253,2.6742107827  
 H,0,-6.2402647014,-4.4491898037,2.1294060643  
 H,0,-4.3595458104,-2.8740053579,1.6819920128  
 H,0,-7.5348808705,-1.2481012611,-1.3060249584  
 H,0,-9.0841046239,0.6983418145,-1.3441549602  
 H,0,-8.1850380605,3.0210740188,-1.1716012315  
 H,0,-5.7248966614,3.3854710152,-0.9585838793  
 H,0,-4.1673634533,1.4407327926,-0.9359210347  
 H,0,-5.9755189374,-2.0738713405,-2.7846972987  
 H,0,-5.4452960205,-4.2300301577,-3.8306556417  
 H,0,-3.8634609277,-6.1377653108,-4.146627997  
 H,0,2.4265521497,0.6766372897,-0.3775829968  
 H,0,2.302048904,2.8601865771,-2.3847510939  
 H,0,1.7007616365,-0.0141432605,-2.4643285977  
 H,0,1.4730329419,-1.0880195756,-4.4653910285  
 H,0,1.7761717478,-1.1351144232,-6.9302052314  
 H,0,2.2482816373,0.9721168785,-8.1627476795  
 H,0,2.4034628277,3.1159948315,-6.9215983694  
 H,0,2.0518570489,3.173262635,-4.4871292736  
 H,0,3.9771871645,4.0324805955,-1.2425190043  
 H,0,4.2647763045,6.882632327,1.1408344542  
 H,0,4.1358113708,6.4183610424,-0.6104976151  
 H,0,5.644207063,6.0350211965,0.320078607  
 H,0,5.0542349588,6.4314091815,4.3438007766  
 H,0,5.8403671721,5.852460224,2.7824022892  
 H,0,5.4333498595,4.6463476796,4.1034561209  
 H,0,3.2206127097,1.9269228438,4.1810888242  
 H,0,1.6956943318,2.8963422457,4.0332103959  
 H,0,3.2252470033,3.6991159781,4.5910765711  
 H,0,2.4642845377,1.3191777561,1.7784359184  
 H,0,4.1711042289,-0.7819056813,-0.0633337891  
 H,0,7.506091,-2.2785876538,-0.9716448566  
 H,0,5.7890585594,-2.8823455813,-0.9457093183  
 H,0,6.4586503102,-1.9830489282,0.4820381573  
 H,0,9.1093094458,-1.6476600365,-3.7843701232  
 H,0,7.6659038289,-0.8091012403,-4.5613852986  
 H,0,7.4045203045,-2.2803296331,-3.495569623  
 H,0,6.712222332,1.5608069286,-4.7941202909  
 H,0,8.1484142595,1.5963505435,-3.6859983332  
 H,0,6.9434239986,2.9556350741,-3.6578600091  
 H,0,4.687150745,2.5822021798,-2.7458547987  
 H,0,-1.2211248913,-4.4600179666,-1.156966001  
 H,0,0.0968414553,3.8603584246,2.7815318125

C,0,-3.9525085335,3.3265749718,-3.8324229063  
 H,0,-2.4714855953,4.4730544702,-2.716734247  
 H,0,-1.9941172406,4.1054593029,-4.3853622602  
 H,0,-4.5107404128,4.2048761362,-4.1654875856  
 H,0,-3.974975513,2.5807104267,-4.6304377229  
 H,0,-4.4499853439,2.9114027862,-2.94969836

### cis-aziridine 4a

medam-cis-aziridine-ONIOM-M06-BB  
 E(RAM1) = -0.909651454324E-01

E(RM062X) = -671.228041599

E(RAM1) = -0.235241149350E-01

Zero-point correction= 0.596774  
 (Hartree/Particle)  
 Thermal correction to Energy= 0.632768  
 Thermal correction to Enthalpy= 0.633712  
 Thermal correction to Gibbs Free Energy= 0.521890  
 Sum of electronic and zero-point Energies= -670.698709  
 Sum of electronic and thermal Energies= -670.662715  
 Sum of electronic and thermal Enthalpies= -670.661771  
 Sum of electronic and thermal Free Energies= -670.773593

|       | E (Thermal)<br>KCal/Mol | CV<br>Cal/Mol-Kelvin | S<br>Cal/Mol-Kelvin |
|-------|-------------------------|----------------------|---------------------|
| Total | 397.068                 | 130.190              | 235.349             |

C,0,2.054689426,-0.6019212885,-0.8855257236  
 C,0,3.2781106733,-0.6446542641,-0.0258279345  
 O,0,4.3782798757,-0.5154974896,-0.7873382668  
 C,0,5.63072755,-0.5998654447,-0.0880307054  
 C,0,6.7307588787,-0.4337346059,-1.1131342159  
 C,0,1.1408229779,-1.8053989078,-0.9894678876  
 H,0,0.6904400632,-1.9091565177,-1.9804409191  
 N,0,0.7748091072,-0.640188251,-0.2278237587  
 C,0,-0.2856865048,0.2395193132,-0.8260737236  
 C,0,-1.6589359505,-0.2728445936,-0.5312452395  
 C,0,-2.5998636586,-0.3199189822,-1.5659692452  
 C,0,-3.9019243661,-0.7693624441,-1.3328873758  
 C,0,-4.2509461151,-1.1844453491,-0.0351314812  
 C,0,-3.164135072,-1.1522105887,1.0146518853  
 C,0,-2.0224827607,-0.6912401222,0.7512509394  
 C,0,-4.8824092212,-0.8060022563,-2.4422420518  
 O,0,-5.5073680825,-1.7347075323,0.2046468561  
 C,0,-6.5247502424,-0.7546347261,0.4072578139  
 C,0,-3.6761797114,-1.6174468732,2.3735453415  
 C,0,-0.1543598414,1.6561882275,-0.3659262251  
 C,0,0.0570555965,1.9702361954,0.978962932  
 C,0,0.1663779288,3.3010840763,1.3953563007  
 C,0,0.0540956295,4.3225507253,0.4361049208  
 C,0,-0.1629034905,4.025127758,-0.9214271487  
 C,0,-0.262818744,2.6861380935,-1.3071097796  
 C,0,-0.2865669366,5.0987371705,-1.9340804809  
 O,0,0.0577628275,5.6471683741,0.8655361325  
 C,0,1.3134306057,6.2989564096,0.6792035517  
 C,0,0.3733663728,3.6145257426,2.8276673234  
 O,0,3.3021246158,-0.797371767,1.1700237242  
 H,0,-0.1539705203,0.2309592225,-1.9302601057  
 C,0,1.3858354413,-3.0992681415,-0.2888462855  
 H,0,2.1652859724,-0.0160732813,-1.7983347337  
 H,0,-2.3202748766,0.0025468421,-2.580794499  
 H,0,-1.2850662483,-0.6618606315,1.5695316705  
 H,0,-0.4375500219,2.4477150624,-2.3676373882  
 H,0,0.1444960739,1.1645824695,1.7258205799  
 H,0,-5.6808611598,-1.5626454306,-2.2386194781  
 H,0,-5.3668036848,0.1963482415,-2.5595302608  
 H,0,-4.3808727959,-1.0675510305,-3.4063493045

H,0,-3.3966324364,-2.6951212386,2.4904546167  
 H,0,-3.1370411138,-1.026029864,3.1536156994  
 H,0,-4.7775402686,-1.5243248503,2.5451757421  
 H,0,-7.4519346985,-1.3605957049,0.5615484853  
 H,0,-6.2975945661,-0.1387619848,1.3108660473  
 H,0,-6.6217532116,-0.1005655594,-0.4934039399  
 H,0,-0.6218998831,6.0538026579,-1.4577291627  
 H,0,0.7023672333,5.2779079124,-2.4269606982  
 H,0,-1.025413365,4.8156239742,-2.7236615775  
 H,0,1.013676344,2.8396226775,3.3163609417  
 H,0,0.8594804968,4.6146633914,2.9479878058  
 H,0,-0.6133932708,3.6429561576,3.3554051868  
 H,0,1.1331221052,7.3374510386,1.0529803363  
 H,0,2.1078377601,5.7930170237,1.2795116042  
 H,0,1.5916884147,6.3080583132,-0.4029021715  
 H,0,5.6576839606,0.181327876,0.6775786231  
 H,0,5.6805784094,-1.5680649325,0.4192500254  
 H,0,7.7062166812,-0.4983127369,-0.6239124781  
 H,0,6.6707265814,-1.2167138797,-1.8730111852  
 H,0,6.6541942855,0.5376485465,-1.6079908597  
 C,0,1.611963873,-4.2487709655,-1.051232827  
 C,0,1.8456461826,-5.4731978799,-0.4304577787  
 C,0,1.8516845172,-5.5566362748,0.9612726051  
 C,0,1.6219500948,-4.4125339692,1.7240957214  
 C,0,1.3889039067,-3.1864279658,1.1053304611  
 H,0,1.6001925721,-4.1838716156,-2.1369693504  
 H,0,2.0172270901,-6.3607634321,-1.0318199406  
 H,0,2.0316692051,-6.5101791086,1.4481618257  
 H,0,1.6238329351,-4.4738743372,2.8079473257  
 H,0,1.2162589895,-2.2858366733,1.684323163

### (S)-VANOL-BOROX catalyst neutral

protonated-catalyst-ONIOM-M06-BB  
 E(RAM1) = -0.726377884039

E(RM062X) = -604.415384573

E(RAM1) = -1.17017353123

Zero-point correction= 0.675393  
 (Hartree/Particle)  
 Thermal correction to Energy= 0.717372  
 Thermal correction to Enthalpy= 0.718316  
 Thermal correction to Gibbs Free Energy= 0.593103  
 Sum of electronic and zero-point Energies= -603.296196  
 Sum of electronic and thermal Energies= -603.254217  
 Sum of electronic and thermal Enthalpies= -603.253273  
 Sum of electronic and thermal Free Energies= -603.378486

|       | E (Thermal)<br>KCal/Mol | CV<br>Cal/Mol-Kelvin | S<br>Cal/Mol-Kelvin |
|-------|-------------------------|----------------------|---------------------|
| Total | 450.158                 | 165.131              | 263.534             |

C,0,-5.3617414969,-3.9941262054,1.3742594562  
 C,0,-5.1221047739,-2.7250641605,0.8209478701  
 C,0,-6.0762027298,-2.0717487293,0.0357032288  
 C,0,-7.2967193906,-2.7063504306,-0.1968616654  
 C,0,-7.5535910171,-3.9652207071,0.3444730688  
 C,0,-6.5885025522,-4.6036316308,1.1258542427  
 O,0,-3.8768669169,-2.2015181749,1.1310756405  
 B,0,-3.3408833254,-1.0093688984,0.7191112737  
 O,0,-3.8893714802,-0.080702823,-0.0876518631  
 B,0,-3.2774503836,1.147744387,-0.3800337838  
 O,0,-2.0164220316,1.3984635806,0.0229081634  
 B,0,-1.0363253444,0.4539096727,0.4099825881  
 O,0,-2.0639120013,-0.7249338929,1.2287454486  
 O,0,-0.1925767738,0.7730751587,1.5305143742  
 C,0,1.0480527124,1.3094409675,1.2423047916

C,0,1.9861212233,0.6122056023,0.486828108  
 C,0,3.1798104932,1.3012939655,0.0975211742  
 C,0,3.4624095228,2.5430668209,0.6330110277  
 C,0,2.5708876875,3.1932889223,1.5234343496  
 C,0,1.3200706347,2.5940659422,1.8081000295  
 C,0,2.8792014644,4.4536541649,2.104987651  
 C,0,1.9725963112,5.0842602392,2.9218598477  
 C,0,0.7166247384,4.4899338397,3.191529311  
 C,0,0.394123064,3.2709968543,2.6457004038  
 C,0,1.7308629559,-0.7719003348,0.07938291  
 C,0,2.6657894296,-1.818722894,0.3667771756  
 C,0,2.4850509022,-3.0733418742,-0.181897536  
 C,0,1.3659955781,-3.3759609259,-0.9983168219  
 C,0,0.3596751875,-2.3972586173,-1.1805054737  
 C,0,0.5514604769,-1.112973269,-0.5773237922  
 C,0,1.208650131,-4.6498623997,-1.6098170417  
 C,0,0.0958996943,-4.927219654,-2.3660186101  
 C,0,-0.9097863493,-3.9477273701,-2.5450718822  
 C,0,-0.7828359826,-2.7088809768,-1.9644418885  
 C,0,3.7709602756,-1.6369825319,1.3131119563  
 C,0,3.5542314708,-1.0104498891,2.5488028536  
 C,0,4.5874667963,-0.9116782769,3.4784685938  
 C,0,5.8466654646,-1.4355148748,3.1870588781  
 C,0,6.0706405318,-2.0587019824,1.9596879561  
 C,0,5.0399590412,-2.1627118296,1.0278020457  
 O,0,-0.4935089308,-0.2250207918,-0.7334119015  
 C,0,4.0790951015,0.7788668337,-0.9359267224  
 C,0,5.4696899612,0.8458416369,-0.7642313225  
 C,0,6.3251379211,0.4201096914,-1.7783913607  
 C,0,5.804485858,-0.0700798387,-2.9757161716  
 C,0,4.423044081,-0.136569166,-3.1548835807  
 C,0,3.5630994939,0.2849166644,-2.14268862  
 O,0,-4.1084489414,2.0182327251,-1.0504329264  
 C,0,-3.8119765131,3.2904515303,-1.5051151436  
 C,0,-4.829303863,3.8601872345,-2.2913019509  
 C,0,-4.6476878154,5.1508465926,-2.7790700864  
 C,0,-3.4787822045,5.8599279255,-2.4954246615  
 C,0,-2.4790660549,5.2784226912,-1.717183774  
 C,0,-2.6354893855,3.9869979148,-1.213258534  
 H,0,-1.7907078773,-4.1906766102,-3.157307961  
 H,0,-0.5778187373,2.7915269958,2.8428147541  
 H,0,-5.8666227871,-1.0773547896,-0.3901003225  
 H,0,-8.0580656495,-2.2044972101,-0.8127189206  
 H,0,-8.5186001246,-4.4578172346,0.1560958469  
 H,0,-6.7942445381,-5.5973766691,1.5512232443  
 H,0,-4.591059726,-4.4824074864,1.9861371104  
 H,0,-5.7420278686,3.2874578846,-2.5049489594  
 H,0,-5.4344978369,5.6116962425,-3.3946828532  
 H,0,-3.3472249539,6.8782972849,-2.8883589047  
 H,0,-1.5570052818,5.8364892088,-1.4957655977  
 H,0,-1.8465998336,3.5215115702,-0.6014169284  
 H,0,2.2102769236,6.0585430186,3.3741633556  
 H,0,3.8562325143,4.9094139484,1.8858980809  
 H,0,4.3881662777,3.0670776398,0.34614444  
 H,0,5.8844612754,1.2286691523,0.1804202065  
 H,0,7.413864372,0.4730839508,-1.6325640177  
 H,0,6.4810511739,-0.4019949127,-3.7763143393  
 H,0,4.0075880603,-0.5212078291,-4.097890887  
 H,0,2.4721891876,0.2303172742,-2.284975726  
 H,0,5.2228555259,-2.6499624092,0.0581315241  
 H,0,7.0629763006,-2.4703735122,1.7245014496  
 H,0,6.6603111762,-1.3571812635,3.9224357542  
 H,0,4.4062425462,-0.4179738665,4.4445050476  
 H,0,2.5622151405,-0.5907467545,2.7785365203  
 H,0,3.2091763803,-3.8762478858,0.0297067324  
 H,0,1.9972815415,-5.4034524299,-1.4661087019  
 H,0,-0.0261908277,-5.9113900731,-2.8423152336  
 H,0,0.0043448521,5.0170161111,3.8430258895  
 H,0,-1.5491577335,-1.9305330926,-2.1051683655  
 H,0,-1.6343764179,-1.3803246392,1.794980458

## Nitrogen (N<sub>2</sub>)

n2-M06-BB  
 E(RM062X) = -109.492028295

|                                              |             |
|----------------------------------------------|-------------|
| Zero-point correction=                       | 0.005761    |
| (Hartree/Particle)                           |             |
| Thermal correction to Energy=                | 0.008122    |
| Thermal correction to Enthalpy=              | 0.009066    |
| Thermal correction to Gibbs Free Energy=     | -0.012676   |
| Sum of electronic and zero-point Energies=   | -109.486267 |
| Sum of electronic and thermal Energies=      | -109.483906 |
| Sum of electronic and thermal Enthalpies=    | -109.482962 |
| Sum of electronic and thermal Free Energies= | -109.504704 |

|       | E (Thermal) | CV             | S              |
|-------|-------------|----------------|----------------|
|       | KCal/Mol    | Cal/Mol-Kelvin | Cal/Mol-Kelvin |
| Total | 5.097       | 4.969          | 45.760         |

N,0,0.,0.,0.1598154916  
 N,0,0.,0.,1.2581845084

## B. Alternative Carbon-Carbon Bond Forming Transition Structures (major enantiomer)

### TS1a

E(RAM1) = -0.749167104996

E(RM062X) = -1385.07070620

E(RAM1) = -1.10467003059

|                                              |              |
|----------------------------------------------|--------------|
| Zero-point correction=                       | 1.282301     |
| (Hartree/Particle)                           |              |
| Thermal correction to Energy=                | 1.363798     |
| Thermal correction to Enthalpy=              | 1.364742     |
| Thermal correction to Gibbs Free Energy=     | 1.147243     |
| Sum of electronic and zero-point Energies=   | -1383.432902 |
| Sum of electronic and thermal Energies=      | -1383.351406 |
| Sum of electronic and thermal Enthalpies=    | -1383.350462 |
| Sum of electronic and thermal Free Energies= | -1383.567960 |

|       | E (Thermal) | CV             | S              |
|-------|-------------|----------------|----------------|
|       | KCal/Mol    | Cal/Mol-Kelvin | Cal/Mol-Kelvin |
| Total | 855.796     | 306.404        | 457.764        |

C,0,-5.9957798336,-0.7016780034,0.9677747753  
 C,0,-5.5770704274,0.5862791213,1.3327699343  
 C,0,-6.531138426,1.6085201949,1.4434468198  
 C,0,-7.8757916814,1.3472385279,1.1879200985  
 C,0,-8.2845867733,0.0640028275,0.826205995  
 C,0,-7.3421850177,-0.9581349304,0.7165725777  
 C,0,-4.1756550776,0.8353394698,1.6869584718  
 C,0,-3.088910498,0.3236524609,0.9076804926  
 C,0,-1.8149934031,0.3304037518,1.4743036763  
 C,0,-1.5492495229,0.9619223972,2.7305877992  
 C,0,-2.6140943756,1.6161554277,3.3957400756  
 C,0,-3.924239538,1.5060495293,2.8692822045  
 C,0,-2.3488569168,2.3115524519,4.6082273829  
 C,0,-1.0857387194,2.3191614723,5.1465201799  
 C,0,-0.0343154604,1.6154944709,4.5108673681  
 C,0,-0.2635828524,0.9449852519,3.3343520401  
 C,0,-3.3069359789,-0.2397829354,-0.4264272463  
 C,0,-2.8468841491,-1.5252704259,-0.7303777031  
 C,0,-3.2562930554,-2.1958330057,-1.9345029812

C,0,-4.0532720048,-1.4900116444,-2.8660624573  
 C,0,-4.3632649481,-0.1287027102,-2.6197301021  
 C,0,-3.9891228209,0.49639477,-1.4450527829  
 C,0,-2.9009112588,-3.5441153062,-2.2003887698  
 C,0,-3.3367682149,-4.1652920311,-3.3468976249  
 C,0,-4.1433201334,-3.4651388511,-4.274047916  
 C,0,-4.4929360935,-2.1566498079,-4.0423131263  
 O,0,-2.0582305233,-2.2514015041,0.1041903327  
 B,0,-0.7821282395,-1.740539317,0.7161825469  
 O,0,-0.7447444552,-0.2433932983,0.8237584873  
 C,0,-4.2324518521,1.9391615744,-1.334641209  
 C,0,-3.2297952293,2.7983157415,-0.8619887786  
 C,0,-3.4359762357,4.176020073,-0.8336388457  
 C,0,-4.6443314895,4.7137916355,-1.275793876  
 C,0,-5.6485540032,3.867050967,-1.7440115843  
 C,0,-5.4457400316,2.4888958555,-1.7760456936  
 O,0,0.3721129994,-2.1022381968,-0.1443222963  
 B,0,0.8709542749,-3.3564315497,-0.0142752532  
 O,0,0.5921814317,-4.1568541374,1.0592123332  
 B,0,-0.1309868842,-3.6128769251,2.1224955601  
 O,0,-0.160360548,-4.4332144091,3.2447099827  
 C,0,-0.8086714702,-4.195766266,4.4379000087  
 C,0,-1.6812653151,-3.1270178556,4.6734726267  
 C,0,-2.2886105937,-3.0176376428,5.9235249183  
 C,0,-2.0306993585,-3.9567909887,6.9214435553  
 C,0,-1.1590556485,-5.0183981347,6.6735013682  
 C,0,-0.5385064265,-5.1510368466,5.4352021609  
 O,0,1.7554810296,-3.7584924486,-1.0351908147  
 C,0,2.4491693008,-4.9479225495,-1.1270889428  
 C,0,2.9723731296,-5.2148462699,-2.4054920877  
 C,0,3.7505667888,-6.3541481384,-2.5878147898  
 C,0,3.9986034334,-7.2214905162,-1.5229645127  
 C,0,3.459204735,-6.9541289571,-0.2651952073  
 C,0,2.6793222248,-5.8176535605,-0.0546931417  
 O,0,-0.6711217525,-2.3876417999,2.0146625405  
 N,0,3.2489974923,-1.3331084665,-1.0359432822  
 N,0,3.8183847812,-1.4505381791,-0.091860377  
 C,0,2.4546355327,-1.0129878166,-2.0946141521  
 C,0,1.9524293463,0.8492234278,-1.690463214  
 C,0,0.9944693334,0.9959896084,-2.823935224  
 C,0,1.4444215943,1.6405165594,-3.979545171  
 C,0,0.5941997553,1.7900638301,-5.0719473558  
 C,0,-0.7044731268,-1.2874068569,-5.0111924885  
 C,0,-1.1501797999,0.6385495103,-3.8585102594  
 C,0,-0.3057314418,0.4891695756,-2.762131648  
 C,0,3.2016806009,-0.9839904589,-3.384293528  
 O,0,4.348233741,-0.6102600977,-3.490265639  
 O,0,2.3980845477,-1.3309559006,-4.3794672643  
 C,0,2.9075627876,-1.1180857877,-5.7125927351  
 N,0,1.5567180177,0.946488296,-0.4121671825  
 C,0,2.2312206839,1.7410263174,0.6642051124  
 C,0,3.7153101019,1.5774961964,0.7247748438  
 C,0,4.2609975568,0.7928263554,1.748351458  
 C,0,5.6447626963,0.6572223977,1.8939918719  
 C,0,6.4883435312,1.3207511158,0.9847487561  
 C,0,5.9597230937,2.1177467793,-0.0474152597  
 C,0,4.5718920365,2.2409258984,-0.1582950588  
 C,0,6.1946596495,-0.1641999584,2.9969525443  
 O,0,7.8671650778,1.2944923986,1.1618745715  
 C,0,8.4851643783,0.1069513087,0.6646670535  
 C,0,6.8485073829,2.8434681605,-0.9831577051  
 C,0,1.8537618587,3.1896420984,0.6390670165  
 C,0,1.8452088444,3.9435824253,-0.5372796846  
 C,0,1.5140302973,5.3012499698,-0.5199365456  
 C,0,1.1812338644,5.9009543488,0.7082656962  
 C,0,1.1606124723,5.1537524478,1.8993147974  
 C,0,1.4935676349,3.7972084587,1.8475141719  
 C,0,1.4874645657,6.0786742625,-1.7797812598  
 O,0,0.7585485323,7.2265867703,0.704372463  
 C,0,1.7567046767,8.1433231514,1.1527316767  
 C,0,0.7803634208,5.7705117784,3.1910233762  
 H,0,1.5201427641,-1.5672544703,-2.0194375888  
 H,0,-3.0679926057,-5.2112975974,-3.5526005376  
 H,0,0.5240708821,0.3502057205,2.8461530656  
 H,0,2.7528206004,-4.5349351423,-3.2393953161  
 H,0,4.1652062077,-6.5731957185,-3.5829160236  
 H,0,4.6122052718,-8.1201249964,-1.679050678  
 H,0,3.6429106044,-7.6455325517,0.5708963374  
 H,0,2.2307288082,-5.6165563365,0.9318547652  
 H,0,0.146431616,-5.9826064785,5.2223784658  
 H,0,-0.9585753013,-5.7596949574,7.4609051903  
 H,0,-2.5148642562,-3.8630868553,7.9035085576  
 H,0,-2.9772372609,-2.1819258069,6.1177331911  
 H,0,-1.8803786724,-2.3889777718,3.879240925  
 H,0,-0.878850526,2.8557973297,6.08382109  
 H,0,-3.1786685172,2.8354069496,5.1055203277  
 H,0,-4.7583225939,1.9320789969,3.4486316091  
 H,0,-6.2124106479,2.6233214832,1.7249332657  
 H,0,-8.61516243,2.156500255,1.2736859642  
 H,0,-9.3463462118,-0.1413169565,0.6288641984  
 H,0,-7.6592900642,-1.971999897,0.43316011395  
 H,0,-5.2504421692,-1.5083559664,0.877144977  
 H,0,-6.2455096835,1.8242708821,-2.1365055075  
 H,0,-6.6055082963,4.2859840747,-2.0875040735  
 H,0,-4.8054736199,5.8009650736,-1.2522546295  
 H,0,-2.6428018402,4.8389643433,-0.4577405455  
 H,0,-2.2791041597,2.3741409339,-0.5027457538  
 H,0,-4.9036007532,0.4324274941,-3.3972238147  
 H,0,-5.1235616972,-1.6055082706,-4.7550069265  
 H,0,-4.488422447,-3.9836257664,-5.1806224532  
 H,0,1.8140991259,1.3088358447,1.5874705989  
 H,0,0.6114072181,0.6450324074,-0.1513530169  
 H,0,2.9316311192,1.2995035554,-1.8823120685  
 H,0,2.4604923355,2.0273736706,-4.0205431757  
 H,0,0.9440273099,2.2994880183,-5.9645561737  
 H,0,-1.3722790509,1.4027118518,-5.8592538777  
 H,0,-2.1653225649,0.24840837,-3.8058740085  
 H,0,-0.6570151885,-0.0226248017,-1.8669988786  
 H,0,2.0861925463,3.4734452386,-1.5039294868  
 H,0,1.6673942688,7.1641036431,-1.5769759129  
 H,0,0.4831308522,5.9787755667,-2.264452774  
 H,0,2.2634405435,5.7110642132,-2.4947311522  
 H,0,1.2376212292,9.1337502581,1.1278691053  
 H,0,2.6303523139,8.1347936111,0.4569137064  
 H,0,2.0839534506,7.8909260438,2.1906298373  
 H,0,0.2037166158,5.0465060127,3.8189053404  
 H,0,0.1492437876,6.6790428555,3.0244445888  
 H,0,1.6975799948,6.0739522473,3.7563484911  
 H,0,1.4481613645,3.1994341622,2.7743782108  
 H,0,3.5971975729,0.2808122326,2.4644269877  
 H,0,7.2307276975,0.1681895108,3.2575549938  
 H,0,6.2338510052,-1.2408493086,2.6927723985  
 H,0,5.55373026,-0.0819148315,3.9093941083  
 H,0,9.5655468972,0.2451368526,0.9195621514  
 H,0,8.3440166407,0.0303730712,-0.4405766145  
 H,0,8.0677566418,-0.7948963149,1.1749690911  
 H,0,7.0247416757,3.8831757293,-0.6070710204  
 H,0,6.391445812,2.907533221,-2.000882407  
 H,0,7.8400228055,2.3314860846,-1.0633845198  
 H,0,4.1578699133,2.8992034638,-0.9391164597  
 H,0,-2.2782168549,-4.0727936769,-1.4603230526  
 H,0,0.9588919952,1.6002645638,4.9817877383  
 C,0,1.7930513877,-1.479124402,-6.6670014043  
 H,0,3.2036105688,-0.0672209791,-5.7980244726  
 H,0,3.7980078923,-1.7386207174,-5.8456962935  
 H,0,2.1204624284,-1.3149557923,-7.6967387088  
 H,0,1.5114002837,-2.5283277934,-6.5528421044  
 H,0,0.9149124758,-0.8580973257,-6.4709508412

**TS1b**

E(RAM1) = -0.749165201903

E(RM062X) = -1385.07070346

E(RAM1) = -1.10466549511

Zero-point correction= 1.282299  
 (Hartree/Particle)  
 Thermal correction to Energy= 1.363796  
 Thermal correction to Enthalpy= 1.364740  
 Thermal correction to Gibbs Free Energy= 1.147240  
 Sum of electronic and zero-point Energies= -1383.432904  
 Sum of electronic and thermal Energies= -1383.351407  
 Sum of electronic and thermal Enthalpies= -1383.350463  
 Sum of electronic and thermal Free Energies= -1383.567963

|       | E (Thermal)<br>KCal/Mol | CV<br>Cal/Mol-Kelvin | S<br>Cal/Mol-Kelvin |
|-------|-------------------------|----------------------|---------------------|
| Total | 855.795                 | 306.405              | 457.768             |

C,0,-6.0673685761,-0.5825290531,0.4945018814  
 C,0,-5.6501922118,0.6840114041,0.9294867454  
 C,0,-6.5883685563,1.7242436949,1.0016958696  
 C,0,-7.9154978697,1.5017545663,0.6399213695  
 C,0,-8.3229341529,0.2396062417,0.2090831224  
 C,0,-7.3964650943,-0.8002850574,0.137060364  
 C,0,-4.2740459348,0.8900452462,1.3934032426  
 C,0,-3.1433483901,0.3768149429,0.6804963968  
 C,0,-1.9151414071,0.3373083327,1.3392125502  
 C,0,-1.7302770339,0.9249141869,2.6308148504  
 C,0,-2.8276971615,1.5834936597,3.2360295064  
 C,0,-4.0971663848,1.5193380174,2.6114560437  
 C,0,-2.6387582789,2.2362563603,4.4859315932  
 C,0,-1.4191875215,2.1987251615,5.1156326035  
 C,0,-0.3383672687,1.4901778085,4.537290551  
 C,0,-0.4935955747,0.860386634,3.3266693261  
 C,0,-3.2734672953,-0.1414956585,-0.683047787  
 C,0,-2.8189907587,-1.4276384662,-0.9925640763  
 C,0,-3.1518763846,-2.0524498856,-2.2439635964  
 C,0,-3.8627435448,-1.3010245918,-3.2089461754  
 C,0,-4.161739252,0.0591445469,-2.9434632449  
 C,0,-3.8627681009,0.6402133611,-1.7254472163  
 C,0,-2.8059018693,-3.400064248,-2.5251964935  
 C,0,-3.1684040102,-3.976633074,-3.7195486616  
 C,0,-3.8892586324,-3.230782137,-4.6810169877  
 C,0,-4.2277802008,-1.9220482564,-4.4346512462  
 O,0,-2.109647145,-2.196302589,-0.1255463269  
 B,0,-0.872229403,-1.7334791307,0.5945601759  
 O,0,-0.8117396449,-0.2414619254,0.7514981458  
 C,0,-4.0834758636,2.0842966376,-1.5880120916  
 C,0,-3.1009181237,2.9056078907,-1.0162644862  
 C,0,-3.279849999,4.2862581242,-0.9599476783  
 C,0,-4.440616625,4.8647302838,-1.4726002178  
 C,0,-5.4248048099,4.0557282909,-2.0396537051  
 C,0,-5.2489662619,2.6748147649,-2.0999044341  
 O,0,0.3350120788,-2.0960190547,-0.1894651278  
 B,0,0.796699941,-3.3646485253,-0.062278381  
 O,0,0.4223209632,-4.1899376558,0.962173513  
 B,0,-0.3665314362,-3.6612694251,1.9857331853  
 O,0,-0.496347891,-4.5136638222,3.0764909214  
 C,0,-1.2265583449,-4.2968816866,4.2254854589  
 C,0,-2.0917553811,-3.2157032188,4.4295049579  
 C,0,-2.7880082985,-3.1295304985,5.6341915913  
 C,0,-2.6247257966,-4.1036734611,6.6184438304  
 C,0,-1.7594075867,-5.177327028,6.4022478745  
 C,0,-1.0513516096,-5.2873979424,5.2095200577  
 O,0,1.7461801239,-3.7564969817,-1.0272955179  
 C,0,2.4199604393,-4.9583225477,-1.1049458362

C,0,3.0310345786,-5.1992781033,-2.3490646835  
 C,0,3.7968380914,-6.3502717363,-2.5090516302  
 C,0,3.947055228,-7.2541960987,-1.4564047719  
 C,0,3.3213729721,-7.0118228549,-0.2340320602  
 C,0,2.5517365937,-5.8644475718,-0.0461686544  
 O,0,-0.871615485,-2.4212752132,1.8767648376  
 N,0,3.2856862748,-1.3672066112,-0.8430752991  
 N,0,3.7811330495,-1.5257478233,0.1360460586  
 C,0,2.5785566824,-0.9976990655,-1.9465825638  
 C,0,2.0865972033,0.8627873638,-1.5225417023  
 C,0,1.2186262917,1.0650480456,-2.7182433128  
 C,0,1.7663031541,1.7329917383,-3.8169711687  
 C,0,1.0027206855,1.9342845139,-4.9637115605  
 C,0,-0.3070178812,1.4600121217,-5.0143003773  
 C,0,-0.8503279775,0.7877342303,-3.9183102783  
 C,0,-0.0927893901,0.5866160331,-2.7680331451  
 C,0,3.4193608053,-0.9478665015,-3.1765262687  
 O,0,4.5781434514,-0.5977036104,-3.1864843328  
 O,0,2.684528493,-1.2466869389,-4.2382438993  
 C,0,3.2955820834,-1.0064198158,-5.5231545292  
 N,0,1.5991771714,0.9312781923,-0.2744211558  
 C,0,2.2083417459,1.6775974948,0.8730659794  
 C,0,3.6800922621,1.4780279255,1.0375498154  
 C,0,4.1317259129,0.6510014652,2.0735260984  
 C,0,5.4977134523,0.479156991,2.3163312952  
 C,0,6.420182058,1.1495841033,1.4928029592  
 C,0,5.9864601351,1.988783437,0.4499046379  
 C,0,4.6135780744,2.147281407,0.2410645377  
 C,0,5.9468725482,-0.3870344302,3.4306077397  
 O,0,7.781188683,1.0861976978,1.7700282896  
 C,0,8.4094599919,-0.1001253615,1.2828894115  
 C,0,6.9572834941,2.7210999355,-0.3947468656  
 C,0,1.8641348946,3.134669936,0.8657120489  
 C,0,1.9588329207,3.923311502,-0.2837971123  
 C,0,1.6557174879,5.2871630439,-0.2482488964  
 C,0,1.2451131563,5.857562076,0.9703308299  
 C,0,1.1203642847,5.075890598,2.1325505384  
 C,0,1.4278417095,3.7141439775,2.0628232468  
 C,0,1.7391333093,6.1022182733,-1.4815480587  
 O,0,0.8516941953,7.1921616507,0.9769385521  
 C,0,1.8326504584,8.0717541015,1.5262918906  
 C,0,0.6580656651,5.6625266369,3.411468205  
 H,0,1.6297431893,-1.5322863596,-1.9573363367  
 H,0,-2.9069509304,-5.0219790281,-3.9376669137  
 H,0,0.3155711872,0.2623594493,2.8793305126  
 H,0,2.888172261,-4.4901429649,-3.175256908  
 H,0,4.279621025,-6.5492659284,-3.4772748601  
 H,0,4.5517949967,-8.1616855754,-1.5948491298  
 H,0,3.42808932,-7.7316902985,0.5913396163  
 H,0,2.035358771,-5.6823580333,0.9104661127  
 H,0,-0.3699908416,-6.1279004005,5.0217828065  
 H,0,-1.6335908396,-5.9461629696,7.1786366739  
 H,0,-3.1785550668,-4.028044627,7.5645945228  
 H,0,-3.4715766308,-2.2842505417,5.8032297998  
 H,0,-2.2157760871,-2.4499532215,3.646307111  
 H,0,-1.2713040645,2.7023620763,6.0819627948  
 H,0,-3.4921055293,2.7641106092,4.9370406485  
 H,0,-4.9628978526,1.9470871275,3.1409663369  
 H,0,-6.2703634973,2.7226095374,1.3375264535  
 H,0,-8.6421974728,2.3249471877,0.6964107739  
 H,0,-9.3711640893,0.064785442,-0.0721370634  
 H,0,-7.7125743312,-1.7976490587,-0.2020952173  
 H,0,-5.3343057085,-1.4031331411,0.43368444596  
 H,0,-6.033498554,2.039869141,-2.5388146641  
 H,0,-6.3447101643,4.5067009881,-2.4392176116  
 H,0,-4.5803465028,5.9541578356,-1.4268820635  
 H,0,-2.5030712768,4.9192186215,-0.5061900968  
 H,0,-2.1885331793,2.4490742011,-0.6016278319  
 H,0,-4.6311376344,0.6554820159,-3.7405654843  
 H,0,-4.7922298911,-1.3355418976,-5.174100443

H,0,-4.1769244458,-3.7139654974,-5.626312666  
H,0,1.7148587221,1.2278908772,1.7490999124  
H,0,0.6310743461,0.6440436916,-0.0933816186  
H,0,3.0864753423,1.2958883313,-1.6277123208  
H,0,2.7904156127,2.0974453022,-3.7710875864  
H,0,1.4282676466,2.4617313127,-5.8118585329  
H,0,-0.9075525912,1.6156725315,-5.9051401752  
H,0,-1.874441948,0.4196164987,-3.9525649977  
H,0,-0.5200568284,0.0567597745,-1.9175695921  
H,0,2.2611575073,3.4767135119,-1.2443493112  
H,0,1.9271302776,7.1764872745,-1.2320135991  
H,0,0.7713772644,6.0409492603,-2.0412518359  
H,0,2.5575945167,5.7376061896,-2.1490833302  
H,0,1.3376675675,9.074243146,1.4943658067  
H,0,2.7552930105,8.0637279193,0.8968776565  
H,0,2.0764011885,7.7810218013,2.5770481769  
H,0,0.0213138944,4.9336820519,3.972072584  
H,0,0.0602060377,6.5899948197,3.2274700228  
H,0,1.5368332258,5.9276536801,4.0521163229  
H,0,1.3011586546,3.0902348608,2.9645811404  
H,0,3.4060148438,0.1335276355,2.7224622669  
H,0,6.9674541588,-0.0865955159,3.7769931126  
H,0,5.9860036449,-1.4548409702,3.0967015021  
H,0,5.2418140082,-0.3169235014,4.2955287328  
H,0,9.470569033,0.0054131869,1.6208281808  
H,0,8.3492560416,-0.1407206958,0.1684037692  
H,0,7.9365277425,-1.0067525269,1.7326988952  
H,0,7.9409437773,2.1886213823,-0.4180979701  
H,0,7.1271775971,3.744676639,0.0258709271  
H,0,6.5783269719,2.8262680039,-1.4407402692  
H,0,4.2725483339,2.8377822687,-0.5471814  
H,0,-2.2509216643,-3.9647555105,-1.7583410486  
H,0,0.6166191556,1.4380483506,5.0792708079  
C,0,2.2474923432,-1.3133858631,-6.5675003  
H,0,3.6189529441,0.0394020452,-5.5539298148  
H,0,4.1803234967,-1.6431247673,-5.6098238728  
H,0,2.6536052501,-1.1266221971,-7.5648469342  
H,0,1.9363191491,-2.3587032867,-6.5069210417  
H,0,1.3704051908,-0.6782641928,-6.4172446828

## TS1c

E(RAM1) = -0.743583391008

E(RM062X) = -1385.07714767

E(RAM1) = -1.09600395298

Zero-point correction= 1.283134  
(Hartree/Particle)  
Thermal correction to Energy= 1.364154  
Thermal correction to Enthalpy= 1.365098  
Thermal correction to Gibbs Free Energy= 1.151306  
Sum of electronic and zero-point Energies= -1383.441593  
Sum of electronic and thermal Energies= -1383.360573  
Sum of electronic and thermal Enthalpies= -1383.359629  
Sum of electronic and thermal Free Energies= -1383.573421

|       | E (Thermal) | CV             | S              |
|-------|-------------|----------------|----------------|
|       | KCal/Mol    | Cal/Mol-Kelvin | Cal/Mol-Kelvin |
| Total | 856.020     | 306.163        | 449.963        |

C,0,6.2025136968,-1.1320308725,-2.1922992634  
C,0,6.3601587315,-1.4477865095,-0.83493502  
C,0,7.3567894662,-2.359494235,-0.4570502052  
C,0,8.173985212,-2.9482652579,-1.4199468275  
C,0,8.011366406,-2.62940852,-2.7677343789  
C,0,7.0248637849,-1.7210579231,-3.1507079354  
C,0,5.5527673915,-0.7670764953,0.1830379467

C,0,4.1410057596,-0.5868599492,0.0375517387  
C,0,3.4973070825,0.3157371873,0.8841885617  
C,0,4.1710149404,0.8993219148,2.0060338038  
C,0,5.5371012966,0.5905741795,2.2119878822  
C,0,6.2137909827,-0.2152227308,1.263736867  
C,0,6.2059399997,1.1356696308,3.3430259961  
C,0,5.5417697784,1.961335632,4.2164060061  
C,0,4.1816335677,2.2857871377,3.9976170744  
C,0,3.5125723477,1.7675021924,2.915838736  
C,0,3.3903872744,-1.2850689322,-1.0090090828  
C,0,2.6317653788,-0.5439332785,-1.9181301561  
C,0,2.0663912355,-1.1506159667,-3.0874017747  
C,0,2.1921377932,-2.5510992327,-3.248556894  
C,0,2.8205014832,-3.3113974927,-2.2307988158  
C,0,3.3968389381,-2.708968409,-1.1278386817  
C,0,1.4040725247,-0.3894702788,-4.0867048397  
C,0,0.895259719,-1.0043618675,-5.2053820096  
C,0,1.0235520569,-2.4038693374,-5.3707608202  
C,0,1.6550227516,-3.1619536153,-4.4150782724  
O,0,2.4416385074,0.8003077075,-1.7610705967  
B,0,1.7071950301,1.2769098622,-0.5452770641  
O,0,2.1708485351,0.6361089179,0.7336458826  
C,0,3.9226833475,-3.5790544254,-0.0706276789  
C,0,3.6441510991,-3.317153995,1.2786010973  
C,0,4.0831298649,-4.1889593738,2.2727370603  
C,0,4.8059329056,-5.3326105822,1.9349035882  
C,0,5.0928624731,-5.5985448042,0.5964110485  
C,0,4.654325884,-4.7302217246,-0.4011213285  
O,0,0.2610051361,0.9237183745,-0.6396485241  
B,0,-0.5187656019,1.7231438179,-1.3948335446  
O,0,-0.1343649432,2.9765509606,-1.7922838156  
B,0,1.0284942915,3.5035718917,-1.2240186814  
O,0,1.1637020905,4.8766694637,-1.4340488127  
C,0,2.2336278726,5.6694817169,-1.0794791412  
C,0,3.4372151324,5.1945583275,-0.5444084366  
C,0,4.4479523771,6.1071950515,-0.2468804587  
C,0,4.263546381,7.4700287959,-0.477944276  
C,0,3.0601299939,7.9309075261,-1.0139026617  
C,0,2.0343362482,7.0418083655,-1.3194961592  
O,0,-1.8080583929,1.2151681439,-1.7093670024  
C,0,-2.7139839829,1.799942848,-2.57195602  
C,0,-3.5832785986,0.903370324,-3.2176172255  
C,0,-4.5946788198,1.4120795764,-4.0280489328  
C,0,-4.7341436396,2.7884965242,-4.208615962  
C,0,-3.8520631008,3.6670718667,-3.5797021599  
C,0,-2.8359981777,3.1830375351,-2.7574265421  
O,0,1.862369661,2.7252577543,-0.5171847968  
N,0,-0.5804770219,-1.3326740539,0.5697489045  
N,0,-0.9933961673,-1.73676135,-0.3753358695  
C,0,-0.29328591,-0.7004007607,1.7438244499  
C,0,-1.9028164723,0.5396770909,1.879110984  
C,0,-1.2976283934,1.9030890134,1.7991404037  
C,0,-0.1975169345,2.2244918024,2.6012804374  
C,0,0.3371792602,3.5053035203,2.5727372774  
C,0,-0.2191841171,4.479276507,1.7433743231  
C,0,-1.3356969194,4.1751908895,0.9712428344  
C,0,-1.8859173415,2.8951609452,1.0113552001  
C,0,-0.4761447807,-1.6124399607,2.9013763177  
O,0,-1.1378205681,-2.6272527363,2.8946678811  
O,0,0.0973487525,-1.0793021531,3.9803612646  
C,0,-0.0625286111,-1.8155130257,5.2127477991  
N,0,-2.8269983824,0.1567929214,0.9877411632  
C,0,-3.8734397433,-0.8637143223,1.322300262  
C,0,-5.2175678485,-0.250876122,1.5497418222  
C,0,-6.0039908306,-0.753455143,2.5930612271  
C,0,-7.2753683791,-0.2340323163,2.8484295845  
C,0,-7.7526496246,0.8131405386,2.0392764081  
C,0,-6.9759420184,1.3309602494,0.9874632906  
C,0,-5.7091500529,0.7862112983,0.7532714819  
C,0,-8.0933036051,-0.7885698394,3.9515903972



O,0,-9.052187478,1.2822802602,2.2010764395  
 C,0,-9.1877190518,2.2312195798,3.2592459307  
 C,0,-7.4904045684,2.415277445,0.12025244  
 C,0,-3.9475837764,-1.9600966059,0.3133888202  
 C,0,-4.4106666073,-1.7188881321,-0.9827161016  
 C,0,-4.5168443433,-2.7590943378,-1.9094200514  
 C,0,-4.1595204892,-4.0606422318,-1.509700906  
 C,0,-3.6813590688,-4.3193920188,-0.2124082267  
 C,0,-3.5726337944,-3.2554324008,0.6876420523  
 C,0,-4.9708851953,-2.4949181141,-3.2933792399  
 O,0,-4.1827258485,-5.0721453041,-2.4634714317  
 C,0,-5.3161824062,-5.933787919,-2.3540385871  
 C,0,-3.2859488015,-5.6839669245,0.2058363213  
 H,0,0.6252747444,-0.1121292643,1.6396486335  
 H,0,0.386546829,-0.417390527,-5.9835174997  
 H,0,2.456686227,2.0129955504,2.715713466  
 H,0,-3.450903415,-0.1813098344,-3.0879758983  
 H,0,-5.2805759418,0.7173550782,-4.5358536483  
 H,0,-5.5322130551,3.179256569,-4.8558555058  
 H,0,-3.9507265009,4.7516599347,-3.7367463388  
 H,0,-2.1167879742,3.8696635102,-2.2819265641  
 H,0,1.0849679789,7.3877319092,-1.7494162439  
 H,0,2.9178462886,9.0055012125,-1.2003751472  
 H,0,5.0668067294,8.1818310308,-0.2417593084  
 H,0,5.3982706066,5.7428493043,0.1710598187  
 H,0,3.5770072202,4.115114029,-0.3672908866  
 H,0,6.0583433164,2.3846776687,5.0900329862  
 H,0,7.2654505265,0.883743511,3.4981374097  
 H,0,7.297213387,-0.3695985874,1.3847509358  
 H,0,7.4865165898,-2.6150757271,0.6051908941  
 H,0,8.9495678245,-3.6649553772,-1.1138762209  
 H,0,8.6591994314,-3.0920839558,-3.5257806051  
 H,0,6.8926643152,-1.4661300585,-4.2123980191  
 H,0,5.4194936502,-0.4177177817,-2.4946767305  
 H,0,4.893438175,-4.9390293831,-1.4550319816  
 H,0,5.6696387517,-6.494750085,0.3252058012  
 H,0,5.1520191407,-6.0191636034,2.7204755792  
 H,0,3.862958685,-3.9694269917,3.3273511209  
 H,0,3.0907853169,-2.4044150284,1.5487471984  
 H,0,2.8280261402,-4.4078369235,-2.3291715575  
 H,0,1.7608729956,-4.2499914515,-4.5355529305  
 H,0,0.6117063566,-2.8746294092,-6.2754559265  
 H,0,-3.5393045952,-1.3115286045,2.2718955123  
 H,0,-2.7471565652,0.494216042,0.0272790907  
 H,0,-2.1227709747,0.21117083251,2.8963415634  
 H,0,0.2538781211,1.4644448551,3.2349563953  
 H,0,1.2042910859,3.7417866191,3.181464732  
 H,0,0.2204131583,5.470713763,1.6958848644  
 H,0,-1.7725550636,4.9275220281,0.3230995654  
 H,0,-2.7735170523,2.6764291643,0.4257510179  
 H,0,-4.7038855489,-0.6974801974,-1.2779609219  
 H,0,-4.0890628563,-2.4945859706,-3.9841861384  
 H,0,-5.4846118867,-1.505262461,-3.3722129929  
 H,0,-5.6722809833,-3.2981670783,-3.6321378612  
 H,0,-5.1529548485,-6.6886428101,-3.1632027968  
 H,0,-6.2578831333,-5.3595085614,-2.5294733049  
 H,0,-5.3401819119,-6.4238373776,-1.3504245386  
 H,0,-2.4250170468,-5.6466628581,0.9182319331  
 H,0,-2.98947648,-6.2978941454,-0.6813329011  
 H,0,-4.1425119991,-6.19140497,0.717719076  
 H,0,-3.1789910521,-3.4488094968,1.7006843426  
 H,0,-5.6277288767,-1.577582642,3.2192529949  
 H,0,-9.1819399103,-0.6133060516,3.7618358324  
 H,0,-7.8190129863,-0.2956766877,4.918521673  
 H,0,-7.9225650835,-1.8882389435,4.0576234417  
 H,0,-10.2795264515,2.4741699335,3.2589061211  
 H,0,-8.5775834998,3.1418011644,3.045103503  
 H,0,-8.8807042872,1.7772361506,4.2327951561  
 H,0,-8.2424009544,3.0361313681,0.6684623381  
 H,0,-7.9941123016,1.9743567264,-0.7771687844

H,0,-6.6604940456,3.0767873157,-0.2297999491  
 H,0,-5.1062033578,1.1933709162,-0.0739293707  
 H,0,1.3208171553,0.6996118045,-3.9386921303  
 H,0,3.673446321,2.9612805889,4.7001942558  
 C,0,0.6549874299,-1.0364013305,6.2912215165  
 H,0,-1.1322792733,-1.9216713911,5.4153293594  
 H,0,0.3579328159,-2.8148673086,5.0705452566  
 H,0,0.5633295651,-1.5618747077,7.2449661285  
 H,0,1.7157615663,-0.9329348171,6.0513608725  
 H,0,0.222926433,-0.0388313793,6.4019255215

## TS1d

E(RAM1) = -0.745459055666

E(RM062X) = -1385.07484967

E(RAM1) = -1.09781905791

Zero-point correction= 1.283321  
 (Hartree/Particle)  
 Thermal correction to Energy= 1.364180  
 Thermal correction to Enthalpy= 1.365124  
 Thermal correction to Gibbs Free Energy= 1.152675  
 Sum of electronic and zero-point Energies= -1383.439169  
 Sum of electronic and thermal Energies= -1383.358310  
 Sum of electronic and thermal Enthalpies= -1383.357366  
 Sum of electronic and thermal Free Energies= -1383.569815

|       | E (Thermal) | CV             | S              |
|-------|-------------|----------------|----------------|
|       | KCal/Mol    | Cal/Mol-Kelvin | Cal/Mol-Kelvin |
| Total | 856.036     | 306.058        | 447.137        |

C,0,6.3901373384,-1.165012477,-1.7854408004  
 C,0,6.47518845,-1.3511699562,-0.3979601801  
 C,0,7.4665731348,-2.1987592134,0.1178563039  
 C,0,8.3498995397,-2.8521266614,-0.7391696738  
 C,0,8.2591780756,-2.6621778936,-2.1176850674  
 C,0,7.2783433421,-1.8180711799,-2.6376970892  
 C,0,5.5962869969,-0.6015454073,0.5059430546  
 C,0,4.1915575452,-0.4731809478,0.2663576979  
 C,0,3.4815812811,0.485021102,0.9895974759  
 C,0,4.0750896333,1.1843359976,2.0902189071  
 C,0,5.4337261648,0.9330640088,2.3981089339  
 C,0,6.1816192053,0.064286275,1.5656670763  
 C,0,6.0236516419,1.5936771936,3.5111539184  
 C,0,5.2907130751,2.4724597203,4.2703487201  
 C,0,3.9378679983,2.7369715812,3.9497210208  
 C,0,3.344334157,2.1082328719,2.8824374417  
 C,0,3.5172994591,-1.2844809285,-0.7502603116  
 C,0,2.7945748655,-0.6517272567,-1.7646380423  
 C,0,2.3129985463,-1.3786496233,-2.9026327222  
 C,0,2.4819414062,-2.7835834704,-2.9267519576  
 C,0,3.0669341244,-3.4294062818,-1.8090506439  
 C,0,3.5631529528,-2.7126250978,-0.7358106901  
 C,0,1.6915692861,-0.731087547,-4.0031109069  
 C,0,1.2643501377,-1.4594800357,-5.0872686148  
 C,0,1.4368699128,-2.8636708965,-5.115926798  
 C,0,2.0296810549,-3.5130693777,-4.0606138972  
 O,0,2.5620992306,0.6944837052,-1.7450848518  
 B,0,1.7561145711,1.2647870568,-0.6173146446  
 O,0,2.1596185185,0.755548034,0.7357069119  
 C,0,4.0444395114,-3.4677637932,0.425898836  
 C,0,3.6870358806,-3.0871731883,1.7274896791  
 C,0,4.0850360563,-3.8519001271,2.8219982955  
 C,0,4.8446275815,-5.005923034,2.6331845489  
 C,0,5.2101336662,-5.3894532257,1.3432275324  
 C,0,4.8133980762,-4.6280168679,0.2458842979  
 O,0,0.3225933109,0.8737686542,-0.7525636842

B,0,-0.4280629636,1.5821947286,-1.6187363184  
 O,0,-0.0417628137,2.7993656225,-2.1134406649  
 B,0,1.0778389806,3.4040044622,-1.5350595517  
 O,0,1.1964922176,4.7555012795,-1.8623979994  
 C,0,2.2219935725,5.6065120803,-1.5107478553  
 C,0,3.3984258617,5.2140248562,-0.8607614302  
 C,0,4.3652653435,6.1777533634,-0.5788421669  
 C,0,4.1643574704,7.5101900403,-0.9379567939  
 C,0,2.9886344567,7.8885942411,-1.5878067596  
 C,0,2.0066945213,6.9471595439,-1.8805989504  
 O,0,-1.6929208331,1.0215696544,-1.9476629948  
 C,0,-2.566262437,1.4958020438,-2.9056831445  
 C,0,-3.4557798398,0.5323820831,-3.4145999194  
 C,0,-4.4277687611,0.9289204884,-4.328618517  
 C,0,-4.5140258783,2.2593587697,-4.7401477538  
 C,0,-3.6170932722,3.2026310243,-4.2397230529  
 C,0,-2.6367404406,2.8316680381,-3.320692815  
 O,0,1.886307323,2.7129699634,-0.7179847675  
 N,0,-0.4646235696,-1.3114501044,0.654424404  
 N,0,-0.7971585238,-1.8021673771,-0.2836669509  
 C,0,-0.2834706662,-0.5591525355,1.7727824923  
 C,0,-1.9752499161,0.6342400928,1.679646064  
 C,0,-1.4026442017,2.000461049,1.5144680524  
 C,0,-0.3703497482,2.432243883,2.354669712  
 C,0,0.135750702,3.7189384901,2.2289549981  
 C,0,-0.3855114847,4.5884384211,1.2699478351  
 C,0,-1.4421854107,4.1780206519,0.4635672144  
 C,0,-1.9619082405,2.8923074223,0.5957922192  
 C,0,-0.4260505912,-1.2940431814,3.0500179654  
 O,0,-0.1850306643,-0.7700095284,4.1115489305  
 O,0,-0.9363751397,-2.5270623936,2.9081806757  
 C,0,-1.0983657413,-3.2749080136,4.1339481452  
 N,0,-2.8033970233,0.1260383066,0.7618489557  
 C,0,-3.8366808059,-0.8959799275,1.1253121526  
 C,0,-5.1911615238,-0.2964531808,1.3269050152  
 C,0,-5.9825637436,-0.7872252929,2.3719016222  
 C,0,-7.2617825098,-0.2764900998,2.6050063533  
 C,0,-7.7419882591,0.7500923124,1.7714916796  
 C,0,-6.9602460024,1.2561096155,0.7174988471  
 C,0,-5.6858795113,0.7201179868,0.5058337995  
 C,0,-8.0844018955,-0.8178979917,3.7111870536  
 O,0,-9.0475468389,1.2085090252,1.9117327961  
 C,0,-9.2037121848,2.1761207158,2.9503401486  
 C,0,-7.4765972043,2.3194983065,-0.1741874036  
 C,0,-3.8869267468,-2.0329348003,0.1608764204  
 C,0,-4.5142466319,-1.9082468229,-1.0799845587  
 C,0,-4.6145511583,-3.0016398461,-1.9476397775  
 C,0,-4.0651907429,-4.2322128774,-1.5487699132  
 C,0,-3.4110664158,-4.3709964529,-0.3088605533  
 C,0,-3.326861419,-3.2615774246,0.5335224685  
 C,0,-5.2896984846,-2.847531518,-3.2565926902  
 O,0,-4.0578755173,-5.316350182,-2.41886364  
 C,0,-5.2983385499,-6.0225187136,-2.4632504628  
 C,0,-2.8054591771,-5.6647196354,0.0799368189  
 H,0,0.5870639066,0.0940932996,1.6493958247  
 H,0,0.7870399272,-0.9608168744,-5.9430200888  
 H,0,2.2949512765,2.3035357968,2.6065805171  
 H,0,-3.3647831419,-0.5162602327,-3.0954218545  
 H,0,-5.1254275991,0.1822673954,-4.7366778723  
 H,0,-5.2819543529,2.5607941169,-5.4666555492  
 H,0,-3.674864682,4.2489488599,-4.5755279718  
 H,0,-1.9094746819,3.5699944596,-2.9450646065  
 H,0,1.0798517374,7.2277439367,-2.3982732381  
 H,0,2.8335048295,8.938990662,-1.8747791416  
 H,0,4.9329035898,8.2626843348,-0.7126133199  
 H,0,5.2939132042,5.8780398403,-0.07055139  
 H,0,3.5519148829,4.158146464,-0.581982461  
 H,0,5.7454527719,2.9833262183,5.1314996941  
 H,0,7.0778685582,1.386002406,3.7467307986  
 H,0,7.2594969928,-0.0486212951,1.7599516551

H,0,7.5398387076,-2.3524322557,1.2048521233  
 H,0,9.1209027288,-3.5176707567,-0.3251112338  
 H,0,8.9591048313,-3.1754878288,-2.7921952374  
 H,0,7.2028305791,-1.6646506477,-3.7241489401  
 H,0,5.6117056037,-0.5014727787,-2.1959232925  
 H,0,5.1160227851,-4.928302602,-0.7688898852  
 H,0,5.817223498,-6.293450314,1.1894881403  
 H,0,5.1594564821,-5.6073534459,3.4977717994  
 H,0,3.8053454087,-3.5373804212,3.8379166832  
 H,0,3.1054942095,-2.1647281012,1.8804871451  
 H,0,3.1063690663,-4.5294888131,-1.8053325792  
 H,0,2.1698722839,-4.6037382728,-4.0748580299  
 H,0,1.0904993274,-3.4262748941,-5.9952392451  
 H,0,-3.5019738612,-1.3005680495,2.0954830164  
 H,0,-2.6773605919,0.390731852,-0.2172359032  
 H,0,-2.2364781244,0.3765465143,2.7071426825  
 H,0,0.0487462839,1.7539155222,3.0950513918  
 H,0,0.9526242093,4.0413309071,2.8668107661  
 H,0,0.0334811338,5.5827150581,1.1496974454  
 H,0,-1.8543597843,4.850022907,-0.2816520779  
 H,0,-2.8033832978,2.5897877738,-0.019593354  
 H,0,-4.9466852499,-0.9394407563,-1.380836114  
 H,0,-4.9197356508,-3.6127885621,-3.9842079423  
 H,0,-5.0999872726,-1.8299149283,-3.6823394824  
 H,0,-6.3951131383,-2.9766354001,-3.1357629291  
 H,0,-5.1217753852,-6.8175152244,-3.2301401505  
 H,0,-6.126569845,-5.3419794036,-2.7774751937  
 H,0,-5.5222616095,-6.4738320972,-1.4664505541  
 H,0,-2.517884849,-5.6715561478,1.1603879369  
 H,0,-1.890075783,-5.8541385788,-0.5366225254  
 H,0,-3.524607998,-6.5005960391,-0.110841183  
 H,0,-2.8137971158,-3.363206651,1.5056383176  
 H,0,-5.6038835641,-1.5941321033,3.0184688128  
 H,0,-9.1729089808,-0.6566750483,3.5085085673  
 H,0,-7.8234565273,-0.304060288,4.6709238722  
 H,0,-7.9043786664,-1.9136543684,3.8397102553  
 H,0,-10.2979340499,2.4074517641,2.9339122866  
 H,0,-8.6006758544,3.0886727735,2.7248910972  
 H,0,-8.9022626174,1.7437565415,3.9353714899  
 H,0,-8.2389090344,2.9435049547,0.3559740744  
 H,0,-7.9684801155,1.8578352024,-1.0677169475  
 H,0,-6.6495301074,2.9820852858,-0.5289860809  
 H,0,-5.0783709786,1.1185624399,-0.3225178276  
 H,0,1.5727624748,0.3639087404,-3.9606319117  
 H,0,3.3728274175,3.4523746832,4.5639242909  
 C,0,-1.6599960437,-4.6296311872,3.7663382826  
 H,0,-0.1204100544,-3.3511228026,4.6167382846  
 H,0,-1.7612961086,-2.7123599295,4.7975155931  
 H,0,-1.7508217144,-5.2425991573,4.6665989151  
 H,0,-2.6507456022,-4.5370616444,3.3130108861  
 H,0,-0.9998493678,-5.1436259138,3.0631159581

### C. Alternative Ring Closing Transition Structures (major enantiomer)

#### TS2a

cis-RC-TS1-ONIOM-M06-BB  
 E(RAM1) = -0.728770402400

E(RM062X) = -1385.06430300

E(RAM1) = -1.08316478035

Zero-point correction= 1.283065  
 (Hartree/Particle)

Thermal correction to Energy= 1.364861

Thermal correction to Enthalpy= 1.365805  
 Thermal correction to Gibbs Free Energy= 1.148392  
 Sum of electronic and zero-point Energies= -1383.426843  
 Sum of electronic and thermal Energies= -1383.345047  
 Sum of electronic and thermal Enthalpies= -1383.344103  
 Sum of electronic and thermal Free Energies= -1383.561517

|       | E (Thermal)<br>KCal/Mol | CV<br>Cal/Mol-Kelvin | S<br>Cal/Mol-Kelvin |
|-------|-------------------------|----------------------|---------------------|
| Total | 856.463                 | 306.902              | 457.586             |

C,0,2.8510415847,6.261263955,-3.0276176408  
 C,0,2.8513700967,4.9609700646,-2.4893351675  
 C,0,3.9852382766,4.4374032743,-1.8573149206  
 C,0,5.1296422578,5.2282668765,-1.7656807467  
 C,0,5.1442064284,6.5182554095,-2.2947684595  
 C,0,4.0070152497,7.0285069509,-2.9230275279  
 O,0,1.6630166971,4.2841456739,-2.6622344859  
 B,0,1.3286937935,3.0248693588,-2.1758706962  
 O,0,0.0496314998,2.612213112,-2.5580415845  
 B,0,-0.4310372788,1.4411028083,-2.0439276805  
 O,0,-1.7639518527,1.0222803411,-2.2853383265  
 C,0,-2.6380766891,1.6740476411,-3.1343704844  
 C,0,-2.6819878716,3.067119911,-3.2777016828  
 C,0,-3.6628153959,3.6317337396,-4.0905867347  
 C,0,-4.5839740309,2.8217541573,-4.7551425602  
 C,0,-4.5227649289,1.4351716314,-4.6157385235  
 C,0,-3.5513318975,0.8467380568,-3.8092524396  
 O,0,0.301307696,0.6300185318,-1.2537185885  
 B,0,1.7486592082,0.8859509056,-1.0275936344  
 O,0,2.0913530398,2.2489423963,-1.3913925647  
 O,0,1.9313902345,0.615394665,0.4529588093  
 C,0,3.2282268811,0.7056896623,0.9019896013  
 C,0,4.2019883716,-0.1995407645,0.4774856867  
 C,0,5.5673793179,0.0741027312,0.8068614506  
 C,0,5.8708354559,1.0735814251,1.7115017821  
 C,0,4.8618434783,1.8868447974,2.2858272786  
 C,0,3.5231008761,1.7369817131,1.8499336928  
 C,0,2.5223774456,2.6038283418,2.3640321308  
 C,0,2.8442570311,3.5645274369,3.2920534341  
 C,0,4.1780818845,3.7023778016,3.7446471983  
 C,0,5.1657327735,2.884955806,3.2522844519  
 C,0,3.8130483094,-1.3754622876,-0.3052213663  
 C,0,3.0406533674,-1.2202701061,-1.4606313969  
 C,0,2.7478229946,-2.3313848149,-2.3216695653  
 C,0,3.1937699032,-3.6181283929,-1.9410023867  
 C,0,3.8747227674,-3.7772167446,-0.7090725695  
 C,0,4.1776465954,-2.6973907067,0.1007695667  
 C,0,2.9246212444,-4.7225246928,-2.7958201138  
 C,0,2.241360207,-4.5413467031,-3.9736329866  
 C,0,1.7924839765,-3.253384145,-4.3503508818  
 C,0,2.0396913516,-2.1696990206,-3.5420344619  
 C,0,6.6779286032,-0.6048150901,0.1317040894  
 C,0,6.6590485984,-0.7769663971,-1.2603167614  
 C,0,7.7483749009,-1.3515185647,-1.9121235758  
 C,0,8.8665532191,-1.7600475955,-1.1856622863  
 C,0,8.8927756349,-1.5918674746,0.1984174758  
 C,0,7.8076477497,-1.0147847991,0.8549354454  
 O,0,2.5765307546,-0.0127342363,-1.8829486906  
 C,0,4.817180955,-2.9884253989,1.3900472465  
 C,0,4.4046718449,-2.3598664295,2.5731270156  
 C,0,4.9650829916,-2.715195975,3.7986087548  
 C,0,5.949915538,-3.6999096594,3.8612971603  
 C,0,6.3792653252,-4.3214715979,2.6890137448  
 C,0,5.8190618837,-3.9704444604,1.462918393  
 N,0,0.6084712396,-1.6379915787,1.489172251  
 N,0,1.2242219124,-2.5448351151,1.549292664  
 C,0,-0.7481493631,-0.5865263001,1.1757660523  
 C,0,-1.1991232315,-0.2327797445,2.5934715164  
 O,0,-0.9428031962,1.0406639647,2.8149248996

C,0,-1.3542942932,1.5638930649,4.1003833877  
 C,0,-0.9486362088,3.0188572928,4.1309210146  
 C,0,-1.637796778,-1.310525234,0.1833419809  
 H,0,-1.1601971744,-1.1393255775,-0.7849380994  
 N,0,-2.6825160128,-0.3024553315,0.3265169894  
 C,0,-3.9522242813,-0.5983933558,1.0508351703  
 C,0,-4.5427454063,0.6555955797,1.6154512416  
 C,0,-4.7413124573,0.7503780841,2.9966120569  
 C,0,-5.3101406228,1.8950915977,3.5618950395  
 C,0,-5.6648880299,2.9621969816,2.7170507659  
 C,0,-5.4606815477,2.8887306719,1.3272451192  
 C,0,-4.8993097489,1.7258313297,0.7910890116  
 C,0,-5.5055665796,1.9736330626,5.0277727365  
 O,0,-6.1244839795,4.1426430817,3.2930201981  
 C,0,-7.5418898083,4.2974306244,3.2183935953  
 C,0,-5.8249008492,4.0125502565,0.4341968891  
 C,0,-4.988798593,-1.3324447188,0.2558187979  
 C,0,-5.2572683958,-1.033359338,-1.0825064804  
 C,0,-6.2554341854,-1.7188111898,-1.7819803667  
 C,0,-6.9902252436,-2.7167586474,-1.116756878  
 C,0,-6.7386954005,-3.0273881947,0.2307639845  
 C,0,-5.7337071185,-2.3262879032,0.9018031288  
 C,0,-7.5167650373,-4.0685992376,0.9404416527  
 O,0,-8.0505861715,-3.3175836464,-1.7889537945  
 C,0,-7.7419915145,-4.6174067596,-2.2907208184  
 C,0,-6.5581794687,-1.3824546734,-3.1914386837  
 O,0,-1.6858177076,-1.0036358341,3.3862427282  
 H,0,1.2516984381,-3.1311654633,-5.2998030159  
 H,0,1.4916887425,2.4860916103,1.991886084  
 H,0,-1.927896419,3.6965748179,-2.7784422914  
 H,0,-3.7017868304,4.7245247781,-4.2131238037  
 H,0,-5.352207234,3.2752339405,-5.3976060657  
 H,0,-5.2398429058,0.7981227464,-5.1549940138  
 H,0,-3.4824611103,-0.2445783985,-3.7038302586  
 H,0,1.9487323955,6.646585384,-3.5208921983  
 H,0,4.0203765066,8.0457930114,-3.3408781599  
 H,0,6.0510584495,7.1341396564,-2.2182560786  
 H,0,6.0257644589,4.8254179039,-1.2707824569  
 H,0,3.9662326345,3.4170844552,-1.4404207124  
 H,0,4.4121867996,4.477757229,4.4886855923  
 H,0,6.2072554282,2.9898592423,3.5903484417  
 H,0,6.92003839,1.2772190739,1.976569849  
 H,0,7.8318756871,-0.8864454855,-1.9473897509  
 H,0,9.7719592947,-1.9133900216,0.7751330515  
 H,0,9.7251273958,-2.2119628338,-1.7024846618  
 H,0,7.7233835429,-1.480433309,-3.0041283358  
 H,0,5.7739073138,-0.4562032715,-1.833700857  
 H,0,6.1745747362,-4.4548695047,0.5405160477  
 H,0,7.1655647021,-5.0894472059,2.7299875524  
 H,0,6.3905884046,-3.9800284701,4.8286690943  
 H,0,4.6329776127,-2.2100788878,4.7172972909  
 H,0,3.6531775917,-1.5574338892,2.530583852  
 H,0,4.1521882626,-4.7966683941,-0.39889645  
 H,0,3.2820915261,-5.7187264055,-2.4968130249  
 H,0,2.0394562817,-5.3932338886,-4.6395280398  
 H,0,-3.6709557302,-1.2448604275,1.8975149039  
 C,0,-1.9589975739,-2.7831382119,0.3007233447  
 H,0,1.7081670972,-1.1551391412,-3.8181564582  
 H,0,2.0750834818,4.2447327067,3.6854184909  
 H,0,-0.184379828,0.2175044491,0.7079309788  
 H,0,-4.4516754973,-0.0848246263,3.6545620972  
 H,0,-4.7440137889,1.6581657519,-0.2975557429  
 H,0,-5.5352570453,-2.5607771703,1.9594462048  
 H,0,-4.6889961985,-0.2475048124,-1.6083901734  
 H,0,-4.5239079623,2.1583987115,5.5329417038  
 H,0,-6.1981284407,2.8107672812,5.2934895544  
 H,0,-5.9289503869,1.016768153,5.4214698521  
 H,0,-5.8437298526,4.9775386727,0.9997504662  
 H,0,-5.0915064819,4.1048227934,-0.4046750237  
 H,0,-6.8398521773,3.8390252306,-0.005151592

H,0,-7.7243752746,5.298681004,3.6821740891  
H,0,-7.8818816566,4.2830432792,2.1543228413  
H,0,-8.0500465015,3.4907190705,3.8001024911  
H,0,-8.5171542124,-4.2096598422,0.4598213945  
H,0,-6.9691898785,-5.0444396793,0.9109074229  
H,0,-7.6721435813,-3.7862651991,2.0108461646  
H,0,-5.7239292402,-0.8026174524,-3.6591659933  
H,0,-6.7324483256,-2.3146991056,-3.7850813011  
H,0,-7.4916501726,-0.7661735621,-3.2396412251  
H,0,-8.69680744,-4.9521997177,-2.7673860078  
H,0,-6.9208251379,-4.5583326391,-3.0454695319  
H,0,-7.4527833858,-5.3006977263,-1.4554074795  
H,0,-2.7575789134,0.2777424569,-0.5059914525  
H,0,-2.4385935692,1.4250800827,4.187281178  
H,0,-0.8643764191,0.9728971638,4.8793050761  
H,0,-1.2227843487,3.4535904022,5.0953877053  
H,0,0.1315894467,3.1190755849,3.9929037013  
H,0,-1.4552065629,3.5771431624,3.340667417  
C,0,-2.1225532171,-3.4845059498,-0.8995141587  
C,0,-2.4136304553,-4.8459603232,-0.8947174198  
C,0,-2.5313584064,-5.5276996721,0.3148381759  
C,0,-2.3599121076,-4.8396229071,1.5139219176  
C,0,-2.078920267,-3.4739845089,1.5112333394  
H,0,-2.0116111138,-2.9590164685,-1.8443295928  
H,0,-2.5333103137,-5.3738102966,-1.8351541527  
H,0,-2.7470582452,-6.5913173377,0.3226971039  
H,0,-2.4430792766,-5.3648974961,2.4601569822  
H,0,-1.9489702311,-2.9521224351,2.4533418578

## TS2b

E(RAM1) = -0.738595660514

E(RM062X) = -1385.06876159

E(RAM1) = -1.09045901661

Zero-point correction= 1.283027  
(Hartree/Particle)  
Thermal correction to Energy= 1.364452  
Thermal correction to Enthalpy= 1.365396  
Thermal correction to Gibbs Free Energy= 1.150569  
Sum of electronic and zero-point Energies= -1383.433871  
Sum of electronic and thermal Energies= -1383.352446  
Sum of electronic and thermal Enthalpies= -1383.351502  
Sum of electronic and thermal Free Energies= -1383.566329

|       | E (Thermal)<br>KCal/Mol | CV<br>Cal/Mol-Kelvin | S<br>Cal/Mol-Kelvin |
|-------|-------------------------|----------------------|---------------------|
| Total | 856.207                 | 306.809              | 452.141             |

C,0,-5.3801685877,-1.9817941032,1.317264025  
C,0,-5.2348052127,-0.5965934796,1.4820977849  
C,0,-6.3823389796,0.20734051,1.5475996724  
C,0,-7.6490120513,-0.3636635099,1.4422388314  
C,0,-7.7855961436,-1.7417387621,1.2779241628  
C,0,-6.649383903,-2.5480020751,1.2157269503  
C,0,-3.9049780152,-0.0105564209,1.6821670765  
C,0,-2.7802884844,-0.3719208468,0.8738976549  
C,0,-1.5088938647,-0.0027566867,1.3120891273  
C,0,-1.3173549486,0.82377664,2.464123816  
C,0,-2.458282804,1.2939694597,3.1574249884  
C,0,-3.7395319524,0.8402850975,2.7591438454  
C,0,-2.2802956635,2.1522589388,4.2781202017  
C,0,-1.0194908628,2.489670469,4.7049657454  
C,0,0.1213824183,1.9752109616,4.0427052556  
C,0,-0.0242015131,1.1572636897,2.9489999616  
C,0,-2.9382398552,-1.1720407245,-0.3431113936  
C,0,-2.2132699234,-2.360138673,-0.4883823778

C,0,-2.5137100514,-3.2897992455,-1.5420729637  
C,0,-3.4869408397,-2.9325522486,-2.5046322562  
C,0,-4.0931530874,-1.6541659732,-2.4334732873  
C,0,-3.8229553194,-0.7819297168,-1.395112426  
C,0,-1.8846750043,-4.5602657585,-1.6242833453  
C,0,-2.2144393782,-5.436509958,-2.6304674497  
C,0,-3.1870170905,-5.0809588189,-3.5947417029  
C,0,-3.8094939587,-3.8578793787,-3.5354494982  
O,0,-1.238487261,-2.7447392886,0.3768807835  
B,0,-0.0681280342,-1.8657367419,0.7577169059  
O,0,-0.3780902666,-0.4030792641,0.632505872  
C,0,-4.4074534645,0.5618622157,-1.4694133485  
C,0,-3.628382224,1.6982891419,-1.2094388023  
C,0,-4.1696729917,2.9743759627,-1.3541763906  
C,0,-5.4937706945,3.1328984327,-1.7619270458  
C,0,-6.2775099115,2.0084443832,-2.0196740882  
C,0,-5.7400902494,0.7309682473,-1.8764684506  
O,0,1.0523903177,-2.1130121978,-0.1845046435  
B,0,1.7874572307,-3.2361224626,0.0309294481  
O,0,1.8040951396,-3.875681209,1.2393615204  
B,0,1.1126839586,-3.3063554177,2.3096302972  
O,0,1.387539735,-3.9125055905,3.5295449742  
C,0,0.8383028432,-3.6097779944,4.7571444148  
C,0,-0.2355923463,-2.7346454216,4.9568874971  
C,0,-0.713508407,-2.5411034308,6.2521281106  
C,0,-0.1310020864,-3.2076700291,7.3294487027  
C,0,0.9399910192,-4.0772501892,7.1168393635  
C,0,1.4376484458,-4.2879134283,5.8346836885  
O,0,2.5513170909,-3.6768474912,-1.0637509132  
C,0,3.3645804697,-4.7889268011,-1.1384552202  
C,0,4.1366879183,-4.8570592595,-2.3127658938  
C,0,4.963859812,-5.9584805032,-2.5107961986  
C,0,5.0309794652,-6.9750014399,-1.557244292  
C,0,4.2653188318,-6.8919515185,-0.3946682055  
C,0,3.4258556677,-5.8009808756,-0.1733499672  
O,0,0.3045242746,-2.250464576,2.1069267735  
N,0,0.7305351075,-1.6272245851,-2.7664784651  
N,0,0.8894113043,-2.613591213,-3.218954539  
C,0,0.6307480577,0.0278136377,-2.2495295239  
C,0,1.9844164904,0.4795094839,-1.7417173984  
C,0,3.1893791075,0.2252628168,-2.6269418597  
C,0,3.8552696318,-0.9939048588,-2.4694863191  
C,0,4.9667551437,-1.2990854888,-3.2516407411  
C,0,5.4316893081,-0.382385916,-4.1922224359  
C,0,4.7755203878,0.8369959019,-4.3487583268  
C,0,3.6572307687,1.1397516741,-3.5736885941  
C,0,0.1016238801,0.644481369,-3.5513034705  
O,0,0.6966840879,1.4705281769,-4.1952098176  
O,0,-1.0738034815,0.1192721001,-3.8502714599  
C,0,-1.7420073474,0.6474255763,-5.0256834515  
N,0,1.5098354502,1.8307890213,-1.5358843791  
C,0,1.6041817603,2.450160393,-0.1790268131  
C,0,2.995034151,2.645834285,0.3410187433  
C,0,3.2080092759,2.5048570868,1.7173981199  
C,0,4.4746046656,2.6936048113,2.2756404907  
C,0,5.5431570359,3.0312575323,1.426055766  
C,0,5.3494481115,3.180917991,0.0413011739  
C,0,4.0687634362,2.9865187885,-0.4853644574  
C,0,4.6682292458,2.5373550728,3.735607443  
O,0,6.7944990583,3.3272579336,1.9581582689  
C,0,7.5718600931,2.1687484749,2.2608962977  
C,0,6.4707460844,3.5623614969,-0.8474206715  
C,0,0.8624862031,3.7487434465,-0.1864165567  
C,0,1.3752606842,4.8602674753,-0.8616568393  
C,0,0.6813566877,6.0724821455,-0.8796127782  
C,0,-0.553192926,6.1523710209,-0.2093342124  
C,0,-1.0874765012,5.0424145084,0.4686900174  
C,0,-0.3676701753,3.8431608811,0.4701367053  
C,0,1.2315205205,7.2371449634,-1.6096074848  
O,0,-1.2917851136,7.3272371427,-0.3178883628

C,0,-1.2082485442,8.1591623466,0.8392339659  
 C,0,-2.3912699596,5.121552368,1.1666141335  
 H,0,-0.0972844779,-0.1077914972,-1.4424891926  
 H,0,-1.7345110083,-6.4239640224,-2.6920733757  
 H,0,0.8442773137,0.7066753042,2.4409752818  
 H,0,4.0759807621,-4.0485591625,-3.053591864  
 H,0,5.5684957557,-6.0241314328,-3.4273259639  
 H,0,5.6883133905,-7.8402455725,-1.7230315786  
 H,0,4.320162119,-7.6922153256,0.3586637383  
 H,0,2.8250154875,-5.7312002873,0.7482566037  
 H,0,2.277885083,-4.9704451055,5.6495513186  
 H,0,1.3977683219,-4.6029194527,7.9676409495  
 H,0,-0.5150747069,-3.0498161828,8.3468991085  
 H,0,-1.5580667305,-1.856240644,6.4191661217  
 H,0,-0.6891038511,-2.2100398571,4.100151841  
 H,0,-0.8797490926,3.1503156277,5.573142787  
 H,0,-3.1732599213,2.5280527528,4.7991807743  
 H,0,-4.6112456112,1.1403100335,3.361770016  
 H,0,-6.2789831708,1.29514109,1.6759425492  
 H,0,-8.5421788107,0.2757264043,1.4915607075  
 H,0,-8.7857901562,-2.1912155668,1.1997073718  
 H,0,-6.7516886708,-3.6356651677,1.0881270745  
 H,0,-4.4821892181,-2.6185930365,1.2663256242  
 H,0,-6.3671611034,-0.1532462957,-2.0676713672  
 H,0,-7.3249949084,2.1281002883,-2.332842934  
 H,0,-5.9191562193,4.140383222,-1.8751652423  
 H,0,-3.5494301534,3.8582430481,-1.1377987706  
 H,0,-2.5871746681,-1.5755075958,-0.8718113381  
 H,0,-4.7846501567,-1.3595036042,-3.2374294898  
 H,0,-4.5745024461,-3.5768401066,-4.2739764737  
 H,0,-3.4414672739,-5.800496177,-4.38696331  
 H,0,1.0779867088,1.7499889068,0.4928187595  
 H,0,1.6979516061,2.4578172568,-2.3096318285  
 H,0,2.1264360855,-0.0086037036,-0.7740607111  
 H,0,3.5024978922,-1.7136639827,-1.7356478805  
 H,0,5.473636886,-2.2495587893,-3.1122751095  
 H,0,6.302590061,-0.6145564374,-4.7971942835  
 H,0,5.1310206177,1.5563430721,-5.0798599881  
 H,0,3.1515115253,2.0875457785,-3.7276484848  
 H,0,2.3487423504,4.7883444989,-1.3719981398  
 H,0,0.8523262428,8.1931835596,-1.1694015193  
 H,0,0.9116874626,7.1994172086,-2.6815874242  
 H,0,2.3484269268,7.2407623401,-1.5727696097  
 H,0,-1.8757340318,9.0225632729,0.5947948052  
 H,0,-0.1566180556,8.5013639435,0.9955062195  
 H,0,-1.5771342219,7.6131905979,1.7414469727  
 H,0,-2.9420480817,4.1509865279,1.0870041758  
 H,0,-3.0267946901,5.9303459805,0.7270895587  
 H,0,-2.2322041678,5.3450954404,2.2518727203  
 H,0,-0.779063348,2.9657307163,1.0009376659  
 H,0,2.3632029975,2.2487441031,2.3795782516  
 H,0,5.5346523676,3.1515103534,4.0867440901  
 H,0,4.8708884378,1.4642771209,3.9828082998  
 H,0,3.7527556513,2.8565311615,4.2929370006  
 H,0,8.5116710503,2.5867245552,2.7000654072  
 H,0,7.7901513221,1.593689146,1.3286618845  
 H,0,7.0397844679,1.5221884329,3.0004238996  
 H,0,7.4473409473,3.2307514791,-0.4138540083  
 H,0,6.5029799224,4.6756104981,-0.9601140851  
 H,0,6.35235778,3.1065761958,-1.8606727868  
 H,0,3.9253497348,3.0986826722,-1.5717846659  
 H,0,-1.1437454406,-4.8237630305,-0.8516056351  
 H,0,1.1215089096,2.2304624977,4.4232751302  
 C,0,-2.3757566204,1.9892237174,-4.7189754754  
 H,0,-1.0100145574,0.7138170268,-5.8338272192  
 H,0,-2.4869816636,-0.1132138404,-5.2596233999  
 H,0,-2.9725520392,2.31234658,-5.5757664092  
 H,0,-3.0334850612,1.9106914987,-3.8469740222  
 H,0,-1.6124757489,2.7456510746,-4.52574358

## TS2c

E(RAM1) = -0.733664460149

E(RM062X) = -1385.06890407

E(RAM1) = -1.08536024914

|                                              |              |
|----------------------------------------------|--------------|
| Zero-point correction=                       | 1.282379     |
| (Hartree/Particle)                           |              |
| Thermal correction to Energy=                | 1.364081     |
| Thermal correction to Enthalpy=              | 1.365025     |
| Thermal correction to Gibbs Free Energy=     | 1.149478     |
| Sum of electronic and zero-point Energies=   | -1383.434866 |
| Sum of electronic and thermal Energies=      | -1383.353164 |
| Sum of electronic and thermal Enthalpies=    | -1383.352220 |
| Sum of electronic and thermal Free Energies= | -1383.567767 |

|       | E (Thermal) | CV             | S              |
|-------|-------------|----------------|----------------|
|       | KCal/Mol    | Cal/Mol-Kelvin | Cal/Mol-Kelvin |
| Total | 855.974     | 307.254        | 453.658        |

C,0,-5.460252218,-2.5420562791,0.6375715932  
 C,0,-5.506354685,-1.2025504933,1.0500691004  
 C,0,-6.7479483623,-0.5546071965,1.1288358689  
 C,0,-7.9182780419,-1.2321793006,0.7930419005  
 C,0,-7.8644131876,-2.5639372328,0.3828012722  
 C,0,-6.6340661551,-3.2160724659,0.3062463002  
 C,0,-4.2843482069,-0.5163326705,1.4830676155  
 C,0,-3.0637911353,-0.5849099589,0.7398821583  
 C,0,-1.8910707399,-0.1423100582,1.3500512184  
 C,0,-1.9022048832,0.5045519417,2.6264467538  
 C,0,-3.1435341682,0.6759894176,3.2852498697  
 C,0,-4.3151492673,0.1334590234,2.7024532442  
 C,0,-3.1730719136,1.3386796838,4.5437428502  
 C,0,-2.0114975046,1.7847201645,5.1244472815  
 C,0,-0.76745591,1.5873840474,4.4782610773  
 C,0,-0.7140034314,0.9619771633,3.2565719698  
 C,0,-3.0182785806,-1.1668438815,-0.6032902093  
 C,0,-2.1449546893,-2.2252919261,-0.8738184364  
 C,0,-2.2735217077,-2.9998501113,-2.0776482621  
 C,0,-3.2044838034,-2.5803792697,-3.0571074124  
 C,0,-3.9397342781,-1.3874343868,-2.847247664  
 C,0,-3.8525243028,-0.6858582457,-1.6591419424  
 C,0,-1.5254644314,-4.1884234839,-2.2892882302  
 C,0,-1.7001349159,-4.9253193732,-3.4361070239  
 C,0,-2.6249612475,-4.5035263748,-4.4207333788  
 C,0,-3.3595336575,-3.3572676051,-4.2383360999  
 O,0,-1.1743789457,-2.6349496266,-0.0138813521  
 B,0,-0.1712486149,-1.7024589338,0.6164835886  
 O,0,-0.6735706396,-0.2882877676,0.7238918705  
 C,0,-4.5720494222,0.5891824865,-1.5640909217  
 C,0,-3.9492287608,1.7276354472,-1.0325034176  
 C,0,-4.6141104025,2.9524112416,-1.0148868055  
 C,0,-5.9085690308,3.0566960443,-1.5229787385  
 C,0,-6.5377071798,1.9287290209,-2.0489735706  
 C,0,-5.8754539503,0.7030741819,-2.0722091939  
 O,0,1.0261113099,-1.5888791277,-0.2514086208  
 B,0,2.0767347615,-2.4195652038,-0.0632411827  
 O,0,2.2206120909,-3.1783438991,1.0653959304  
 B,0,1.2669240347,-3.0497575565,2.0769621415  
 O,0,1.5977054891,-3.7478112666,3.2331217455  
 C,0,0.8541294971,-3.8528690761,4.3895396846  
 C,0,-0.445868215,-3.360166517,4.5513687043  
 C,0,-1.0910754738,-3.5531624777,5.7720895994  
 C,0,-0.4521430802,-4.2257588696,6.8130419441  
 C,0,0.8441166112,-4.7131127993,6.6384287162  
 C,0,1.5117957486,-4.5333708145,5.4309732536  
 O,0,3.0248828414,-2.4341709173,-1.1073048774

C,0,4.1761739486,-3.196398614,-1.1404113443  
 C,0,4.6747709176,-3.4585616192,-2.4285223402  
 C,0,5.8773074901,-4.1485788025,-2.5566899571  
 C,0,6.5701551694,-4.5818048114,-1.4259382742  
 C,0,6.0566777014,-4.3293394652,-0.1538465912  
 C,0,4.8574364728,-3.6364297003,0.0013311857  
 O,0,0.1786274749,-2.2827600404,1.8991979187  
 N,0,0.5305608148,-1.3181987594,-2.8638381524  
 N,0,0.8056305536,-2.2896444839,-3.2909869345  
 C,0,0.4954565806,0.3914925537,-2.2635578896  
 C,0,1.9555097334,0.7375828622,-2.0876065063  
 C,0,2.7473802315,0.861562108,-3.3658708398  
 C,0,3.7083315374,-0.1051583402,-3.6668854012  
 C,0,4.4383532151,-0.0214493906,-4.851941758  
 C,0,4.2146811506,1.0274391289,-5.7404983627  
 C,0,3.2540109,1.9938355293,-5.4456520952  
 C,0,2.5216825083,1.9090880047,-4.2654338081  
 C,0,-0.2875739421,0.9970523033,-3.4361967345  
 O,0,-0.3920821612,0.4476922776,-4.502585225  
 O,0,-0.8092811901,2.1665159169,-3.1133585786  
 C,0,-1.5839034614,2.8071354136,-4.158925081  
 N,0,1.5911850801,1.9933119203,-1.4562699571  
 C,0,1.6982667384,2.1053692505,0.0355272478  
 C,0,3.0889160347,1.9495577782,0.5676408412  
 C,0,3.2608357965,1.2644782586,1.7759520786  
 C,0,4.5304839688,1.0915778374,2.3343079659  
 C,0,5.6441428261,1.6133900084,1.6528225423  
 C,0,5.4927061366,2.3048313364,0.4373225311  
 C,0,4.2084082896,2.4680746775,-0.0896752889  
 C,0,4.6786187175,0.3681333296,3.6180812222  
 O,0,6.9119091087,1.5445385926,2.2222548032  
 C,0,7.5465017063,0.2778085644,2.0451271224  
 C,0,6.6654333785,2.8740423869,-0.2650480559  
 C,0,1.0875026198,3.4037193314,0.454006115  
 C,0,1.7886379084,4.6066103436,0.3346328738  
 C,0,1.1976619444,5.8209940457,0.6926686887  
 C,0,-0.1279837321,5.8133623296,1.163343037  
 C,0,-0.8509294548,4.6132933641,1.284934366  
 C,0,-0.228045909,3.4130214685,0.928514046  
 C,0,1.9525135897,7.0870737004,0.5529101145  
 O,0,-0.751018864,7.0335313208,1.4095754371  
 C,0,-0.8211374895,7.3656030945,2.7962948996  
 C,0,-2.2497371867,4.6032564593,1.7709951987  
 H,0,-0.0438637805,0.1962949369,-1.3315138748  
 H,0,-1.131068083,-5.8523803906,-3.5975802623  
 H,0,0.2431109849,0.7861927015,2.7399711557  
 H,0,4.1151553142,-3.127628631,-3.3133442754  
 H,0,6.2767113443,-4.3590710371,-3.5598021471  
 H,0,7.5166189858,-5.12946927,-1.5386104863  
 H,0,6.5963490274,-4.6831534273,0.7373706373  
 H,0,4.4334538657,-3.4560916634,1.0022466436  
 H,0,2.530331376,-4.9135523063,5.276103347  
 H,0,1.3461119431,-5.2449530505,7.4599453077  
 H,0,-0.9688212301,-4.3736329656,7.7716240118  
 H,0,-2.1130185197,-3.1694184201,5.9089156896  
 H,0,-0.9448396166,-2.8286336957,3.7245062028  
 H,0,-2.0314737043,2.2912501517,6.1005117236  
 H,0,-4.1439285649,1.4765002875,5.0422649631  
 H,0,-5.2593933438,0.2018342744,3.2652229753  
 H,0,-6.7941825357,0.4962213369,1.4515981612  
 H,0,-8.8862242002,-0.7142324299,0.8548165589  
 H,0,-8.7890923405,-3.0984538013,0.1224660164  
 H,0,-6.5864494274,-4.2669411355,-0.0148730162  
 H,0,-4.4878205955,-3.0565096019,0.5748817052  
 H,0,-6.3814528261,-0.1866885994,-2.4772403275  
 H,0,-7.5615473495,2.0036871209,-2.4436220053  
 H,0,-6.4327994373,4.0229022234,-1.5043793389  
 H,0,-4.1157093208,3.8373004796,-0.5905837212  
 H,0,-2.9321941967,1.6470867795,-0.6158844966  
 H,0,-4.5857914775,-1.0228031237,-3.6604131473

H,0,-4.086186477,-3.0250606152,-4.99439927  
 H,0,-2.7507612157,-5.1099334118,-5.329906901  
 H,0,1.0790902449,1.2878185021,0.4447748566  
 H,0,1.9207284597,2.8117082829,-1.9562365734  
 H,0,2.4243911803,0.0302245037,-1.3980596692  
 H,0,3.8774710456,-0.9198946182,-2.9653408299  
 H,0,5.1857668383,-0.7755678634,-5.076822789  
 H,0,4.784951384,1.0932348674,-6.6614479356  
 H,0,3.0710690366,2.8108340642,-6.136247242  
 H,0,1.7651802755,2.6652432941,-4.0587370456  
 H,0,2.8281497726,4.602426087,-0.0295575109  
 H,0,1.5640290485,7.8582360557,1.264197555  
 H,0,1.8373783432,7.4863190936,-0.4863350167  
 H,0,3.0404597194,6.9274390162,0.7525748589  
 H,0,-1.3738387173,8.3377520534,2.809347587  
 H,0,0.2060351994,7.4866205255,3.2179018093  
 H,0,-1.3821401565,6.5804235424,3.3592179157  
 H,0,-2.8424618873,3.8084795905,1.2521511523  
 H,0,-2.7394615421,5.5922172795,1.5893133692  
 H,0,-2.2725290174,4.3919718095,2.8701965723  
 H,0,-0.7826150999,2.4617970849,1.0322558035  
 H,0,2.3843911651,0.8507556231,2.301843612  
 H,0,5.6252204741,0.6665429705,4.1338075992  
 H,0,4.7055554908,-0.7361938215,3.4352187348  
 H,0,3.8176543316,0.5874209733,4.2968787534  
 H,0,8.514440818,0.3867048405,2.5946891027  
 H,0,7.7250202754,0.0829708336,0.9599347771  
 H,0,6.9256776195,-0.5379831445,2.4890543538  
 H,0,7.5850660827,2.2772656795,-0.0415777124  
 H,0,6.8424133888,3.9234915279,0.0819312507  
 H,0,6.5038768548,2.8883950218,-1.3705496032  
 H,0,4.0984826065,3.0148143914,-1.0387557515  
 H,0,-0.8249171228,-4.5084241592,-1.5003761748  
 H,0,0.1518696288,1.9365520495,4.9700340502  
 C,0,-2.1821000043,4.0575689335,-3.5585257186  
 H,0,-0.9104325504,3.0186131306,-4.9952087071  
 H,0,-2.3443525055,2.1008773703,-4.5021049366  
 H,0,-2.77166237,4.5788816452,-4.3165721772  
 H,0,-2.8391657342,3.8025168442,-2.7210243655  
 H,0,-1.4008582729,4.7314522363,-3.199263756

## TS2d

E(RAM1) = -0.728447014753

E(RM062X) = -1385.06964320

E(RAM1) = -1.08230502754

Zero-point correction= 1.282222  
 (Hartree/Particle)  
 Thermal correction to Energy= 1.363782  
 Thermal correction to Enthalpy= 1.364726  
 Thermal correction to Gibbs Free Energy= 1.151317  
 Sum of electronic and zero-point Energies= -1383.433563  
 Sum of electronic and thermal Energies= -1383.352003  
 Sum of electronic and thermal Enthalpies= -1383.351059  
 Sum of electronic and thermal Free Energies= -1383.564468

|       | E (Thermal) | CV             | S              |
|-------|-------------|----------------|----------------|
|       | KCal/Mol    | Cal/Mol-Kelvin | Cal/Mol-Kelvin |
| Total | 855.786     | 307.556        | 449.156        |

C,0,-5.8360921689,-1.3725855392,1.5848711934  
 C,0,-5.6600084496,0.017708046,1.6381285994  
 C,0,-6.7888895169,0.8501086075,1.6222488367  
 C,0,-8.0673425468,0.3011345905,1.5461065671  
 C,0,-8.234492385,-1.0823228868,1.4926776373  
 C,0,-7.1170162192,-1.9164564292,1.5123246184

C,0,-4.3194929386,0.5895429469,1.8045695651  
 C,0,-3.1986759831,0.1513817123,1.0298518251  
 C,0,-1.9227793565,0.537199839,1.4373176739  
 C,0,-1.7191768321,1.4419656818,2.5265738281  
 C,0,-2.8543374893,1.9814151637,3.1777932714  
 C,0,-4.1421798974,1.5169406003,2.8138736213  
 C,0,-2.6666258089,2.928884662,4.2221608451  
 C,0,-1.4018622545,3.2888802369,4.6178175932  
 C,0,-0.2673031573,2.7080171363,4.0014791709  
 C,0,-0.4227117478,1.7996362854,2.9825882484  
 C,0,-3.3684982768,-0.7363055608,-0.1225691994  
 C,0,-2.6657039184,-1.9445313688,-0.1775343023  
 C,0,-3.0185411397,-2.9626153662,-1.1284923431  
 C,0,-3.9999868104,-2.6676720334,-2.1042131515  
 C,0,-4.5541244265,-1.3643834693,-2.1554583883  
 C,0,-4.247473887,-0.4112556812,-1.201847336  
 C,0,-2.4401651246,-4.2589892909,-1.0894252965  
 C,0,-2.8305187298,-5.2220326629,-1.9891381252  
 C,0,-3.811794213,-4.9294935511,-2.9655569935  
 C,0,-4.382758269,-3.681373041,-3.0251083025  
 O,0,-1.6644543697,-2.2653874109,0.6858509488  
 B,0,-0.4799363311,-1.3683834442,0.9348427277  
 O,0,-0.8018764733,0.0899367721,0.7747712364  
 C,0,-4.7770427108,0.9434412787,-1.3931044771  
 C,0,-3.960364497,2.0662749796,-1.1945363033  
 C,0,-4.4433829409,3.3470259991,-1.4545368229  
 C,0,-5.7481159695,3.5248923767,-1.9137536748  
 C,0,-6.5707549934,2.4153755975,-2.1061136028  
 C,0,-6.0907137117,1.1327307375,-1.8494443115  
 O,0,0.574559654,-1.6103471782,-0.0793693669  
 B,0,1.5327266366,-2.5344892125,0.1567806667  
 O,0,1.7530174746,-3.0645719137,1.399667426  
 B,0,0.9943648179,-2.5834997583,2.4687340955  
 O,0,1.4096301453,-3.076164011,3.7012205417  
 C,0,0.8304925069,-2.8475998358,4.9319614837  
 C,0,-0.3714934809,-2.1596015386,5.1333541109  
 C,0,-0.8554729635,-2.0180827141,6.4331884232  
 C,0,-0.1539775946,-2.532538719,7.5128305622  
 C,0,1.043200069,-3.2381269346,7.2980957349  
 C,0,1.5496108431,-3.3931585884,6.0113898802  
 O,0,2.310901108,-2.8971820976,-0.961224177  
 C,0,3.3911913628,-3.7576073959,-0.934026274  
 C,0,3.6432011746,-4.436618117,-2.1384549331  
 C,0,4.7673606621,-5.2535012469,-2.2266905495  
 C,0,5.6223488001,-5.403436504,-1.134361063  
 C,0,5.3539730929,-4.7338182975,0.0595598797  
 C,0,4.2384395055,-3.9060183579,0.1714019865  
 O,0,0.0064147334,-1.696851895,2.2629966846  
 N,0,-0.3004061988,-1.430073097,-2.5719072478  
 N,0,-0.3130067314,-2.483583835,-2.8777966311  
 C,0,0.2093721736,0.3081461056,-2.2353135668  
 C,0,1.7156873589,0.317876065,-2.3287974007  
 C,0,2.2649700263,0.0080962808,-3.7038753755  
 C,0,2.6115030473,-1.3143924702,-3.9973613404  
 C,0,3.0635929063,-1.6546841052,-5.2703611773  
 C,0,3.1778696309,-0.6765081671,-6.2567558754  
 C,0,2.8458033521,0.6449882545,-5.9634571298  
 C,0,2.3902109067,0.9883547279,-4.6918549904  
 C,0,-0.5533867366,1.055697964,-3.3303008329  
 O,0,-0.3405806901,2.2235131523,-3.5511363934  
 O,0,-1.4221999086,0.3037261813,-3.9765038267  
 C,0,-2.1937000489,0.9725646629,-5.0092572854  
 N,0,1.8787454596,1.6660612455,-1.8565258506  
 C,0,2.1004000678,1.9546963171,-0.4021514342  
 C,0,3.3545930513,1.3194554898,0.1096935535  
 C,0,3.2728814471,0.4704849256,1.2188282145  
 C,0,4.4150119723,-0.1479019391,1.7367873926  
 C,0,5.6547479621,0.1004415565,1.1209349005  
 C,0,5.7564589952,0.9530414262,0.0070701356  
 C,0,4.5958962793,1.5546798104,-0.4873033807  
 C,0,4.3002903941,-1.0438954092,2.9102706882  
 O,0,6.8052155569,-0.4410274963,1.6875843067  
 C,0,7.2552280917,-1.6239524426,1.0268281858  
 C,0,7.0612048642,1.2158914184,-0.6425049219  
 C,0,2.1225789881,3.4344671319,-0.1800983306  
 C,0,2.8704152305,4.2908515502,-0.9944067872  
 C,0,2.8941268012,5.6691947713,-0.7603703219  
 C,0,2.14794288,6.1858788244,0.3129543216  
 C,0,1.3814655125,5.3420890985,1.1370470374  
 C,0,1.3750090702,3.9699295586,0.8740641224  
 C,0,3.6963555383,6.5541788271,-1.6360171275  
 O,0,2.0708488718,7.5609199954,0.5134749833  
 C,0,3.1866082393,8.0928220029,1.2276616034  
 C,0,0.5748390848,5.8947732137,2.2488119027  
 H,0,-0.2037339949,0.3421907436,-1.2194108422  
 H,0,-2.3917122392,-6.2297711168,-1.9552361184  
 H,0,0.4431509595,1.3076530776,2.5091255305  
 H,0,2.9582019728,-4.320204247,-2.9886667764  
 H,0,4.9755139374,-5.7893923396,-3.1645139109  
 H,0,6.5037814767,-6.055595363,-1.2131640389  
 H,0,6.0218897277,-4.861781162,0.9246507019  
 H,0,4.0066480265,-3.3895836189,1.1177627069  
 H,0,2.4880370805,-3.932276326,5.8249212341  
 H,0,1.594605521,-3.6609682921,8.150716232  
 H,0,-0.543330843,-2.4370782021,8.533945178  
 H,0,-1.799471027,-1.4788684946,6.6018848587  
 H,0,-0.9205153859,-1.7386782822,4.2751357355  
 H,0,-1.2541179545,4.0208668663,5.4253199781  
 H,0,-3.5551157718,3.3586735025,4.7079979342  
 H,0,-5.0101510592,1.8781360821,3.3876313671  
 H,0,-6.6608948532,1.9421444781,1.6636632038  
 H,0,-8.9456810777,0.9624412532,1.5310003208  
 H,0,-9.2440114388,-1.5139856619,1.4374472037  
 H,0,-7.2435799952,-3.0082872759,1.472498226  
 H,0,-4.9530486148,-2.0314701386,1.5982026379  
 H,0,-6.7502875049,0.2624905256,-1.9880403702  
 H,0,-7.604324322,2.5512713609,-2.4567418905  
 H,0,-6.1285286899,4.536248118,-2.116825576  
 H,0,-3.7934304528,4.2191813558,-1.2902633567  
 H,0,-2.9372545657,1.9306699579,-0.8101172439  
 H,0,-5.2384787133,-1.1211347943,-2.982588886  
 H,0,-5.1533843617,-3.4478166821,-3.7742362372  
 H,0,-4.1146077963,-5.7172782806,-3.6711617484  
 H,0,1.2540112907,1.5354889934,0.1765874834  
 H,0,1.4939614858,2.418684262,-2.4133014065  
 H,0,2.1132852941,-0.3793463454,-1.5862943154  
 H,0,2.5416069901,-2.0680081865,-3.2148409194  
 H,0,3.3362724393,-2.682853731,-5.4865867666  
 H,0,3.5340504382,-0.9405760916,-7.2475608591  
 H,0,2.9457823318,1.4130533996,-6.7238984734  
 H,0,2.1424609408,2.0226843506,-4.4737362691  
 H,0,3.4597031612,3.889272254,-1.8334295384  
 H,0,3.2920763706,7.5971938161,-1.6200064728  
 H,0,3.686311396,6.1839429292,-2.6906364903  
 H,0,4.7586650996,6.5813049877,-1.2839390902  
 H,0,2.970410114,9.1888164813,1.2806092783  
 H,0,4.1349272143,7.9000215366,0.669213882  
 H,0,3.2416418575,7.6485825153,2.2508656279  
 H,0,0.3112977852,5.1000731734,-2.9918994054  
 H,0,-0.3732301229,6.3330028559,1.8459298001  
 H,0,1.1364302678,6.7101925365,2.7694915618  
 H,0,0.7710668894,3.3071091335,1.5180147857  
 H,0,2.2953240317,0.2662798653,1.6895126948  
 H,0,5.2208982265,-1.6679343237,3.0267096675  
 H,0,3.4151179225,-1.7254254944,2.8054361251  
 H,0,4.1684138972,-0.4376179298,3.8415572069  
 H,0,8.1409842325,-1.9446114683,1.6293042244  
 H,0,7.5521856965,-1.3888602484,-0.0245212307  
 H,0,6.4586668153,-2.4096663467,1.0374471053  
 H,0,7.2044002945,0.5229814721,-1.5099412051

H,0,7.9005863239,1.0556356076,0.079501265  
 H,0,7.1113061912,2.2664798738,-1.0207778597  
 H,0,4.6692022121,2.2211893505,-1.3601224423  
 H,0,-1.6891836811,-4.4693018754,-0.3100167825  
 H,0,0.7358508533,2.9844749067,4.3575670143  
 C,0,-3.1473149924,-0.0531468954,-5.5748362661  
 H,0,-2.7095135112,1.8182084646,-4.5472925002  
 H,0,-1.4908988596,1.3549743037,-5.7538141987  
 H,0,-3.7607696383,0.4117436926,-6.3501967958  
 H,0,-2.601467411,-0.8888749055,-6.0183258794  
 H,0,-3.8073742954,-0.4373695577,-4.7919644067

## TS2e

E(RAM1) = -0.740870058300

E(RM062X) = -1385.06837739

E(RAM1) = -1.09351061405

Zero-point correction= 1.282578  
 (Hartree/Particle)  
 Thermal correction to Energy= 1.364022  
 Thermal correction to Enthalpy= 1.364966  
 Thermal correction to Gibbs Free Energy= 1.150954  
 Sum of electronic and zero-point Energies= -1383.433158  
 Sum of electronic and thermal Energies= -1383.351715  
 Sum of electronic and thermal Enthalpies= -1383.350771  
 Sum of electronic and thermal Free Energies= -1383.564783

|       | E (Thermal)<br>KCal/Mol | CV<br>Cal/Mol-Kelvin | S<br>Cal/Mol-Kelvin |
|-------|-------------------------|----------------------|---------------------|
| Total | 855.937                 | 307.232              | 450.427             |

C,0,-5.9051544113,-1.6597255608,1.4862897537  
 C,0,-5.8302380125,-0.2600916018,1.5386459664  
 C,0,-7.0174869123,0.4859800792,1.5753943151  
 C,0,-8.2538135349,-0.1563264292,1.5522092703  
 C,0,-8.3202027789,-1.5482633494,1.4993644997  
 C,0,-7.1441428153,-2.2970679398,1.4664566572  
 C,0,-4.5289212402,0.4073177184,1.6511927  
 C,0,-3.4054852448,0.0295138275,0.8490966082  
 C,0,-2.1422008418,0.4874830744,1.2227726238  
 C,0,-1.9669120234,1.4244519744,2.29008198  
 C,0,-3.1157601174,1.9092943232,2.960321001  
 C,0,-4.3821063588,1.3607376263,2.6409278249  
 C,0,-2.9590648289,2.8828736106,3.9856443059  
 C,0,-1.7081830878,3.3158268496,4.3507358266  
 C,0,-0.5567348597,2.787659734,3.7188522286  
 C,0,-0.6834086393,1.8610205687,2.7124713071  
 C,0,-3.5524138201,-0.866672657,-0.3004274704  
 C,0,-2.7774758866,-2.0285830586,-0.3737477939  
 C,0,-3.037973385,-3.0354401234,-1.363726335  
 C,0,-4.0265841701,-2.7821762451,-2.3438255356  
 C,0,-4.692486287,-1.5321072128,-2.3476977487  
 C,0,-4.4652689707,-0.5873112621,-1.3635732307  
 C,0,-2.3560017914,-4.2814240846,-1.3661228893  
 C,0,-2.6500026995,-5.233627187,-2.3122846164  
 C,0,-3.6363758169,-4.9813456327,-3.29527882  
 C,0,-4.3089986521,-3.7839913874,-3.3133783442  
 O,0,-1.7864981758,-2.3127763862,0.5159301196  
 B,0,-0.6446980909,-1.3697515607,0.774368195  
 O,0,-1.0094491987,0.0716454032,0.5581766088  
 C,0,-5.1337792331,0.7115238651,-1.5009928392  
 C,0,-4.4337637607,1.9076631943,-1.2884703629  
 C,0,-5.0599634612,3.137300138,-1.4853487285  
 C,0,-6.3912914667,3.1897752477,-1.8966620706  
 C,0,-7.0964443691,2.0052902086,-2.1083514512  
 C,0,-6.47416224,0.7740444069,-1.9135994691  
 O,0,0.4514890311,-1.626724284,-0.1943378382

B,0,1.3717395381,-2.5739197362,0.1043670209  
 O,0,1.5526890073,-3.051086866,1.3746555078  
 B,0,0.7843491034,-2.5057338323,2.4045318043  
 O,0,1.1866761743,-2.9256119837,3.6683001791  
 C,0,0.596917576,-2.6236582486,4.8777899126  
 C,0,-0.6072209584,-1.9258211261,5.0257730095  
 C,0,-1.1035069321,-1.7061538609,6.3099405614  
 C,0,-0.411945409,-2.1741958994,7.4266294565  
 C,0,0.7873136376,-2.8698672291,7.265104297  
 C,0,1.3058812565,-3.1022856252,5.9949520847  
 O,0,2.1595971857,-3.0165363538,-0.9755335425  
 C,0,3.2038195649,-3.9168364087,-0.9008654995  
 C,0,3.4899534326,-4.588584907,-2.1025061827  
 C,0,4.5769593165,-5.4572553806,-2.1446061223  
 C,0,5.364615238,-5.6628178254,-1.0112857967  
 C,0,5.0652317303,-4.9964772008,0.1768759242  
 C,0,3.9845865804,-4.1186322786,0.2440456265  
 O,0,-0.1950753355,-1.6290385169,2.1330733819  
 N,0,-0.1352634944,-1.1782986258,-2.7772580056  
 N,0,-0.2256004217,-2.2124478599,-3.1302288106  
 C,0,0.325373539,0.432643896,-2.3013810945  
 C,0,1.8371232892,0.4490061543,-2.1662226086  
 C,0,2.6398200006,0.1245555624,-3.4130603224  
 C,0,2.9849833675,-1.2142369024,-3.6299281821  
 C,0,3.7113171152,-1.5839997175,-4.7599342555  
 C,0,4.1150182,-0.6182403126,-5.6789701738  
 C,0,3.7854314775,0.7180653481,-5.4616352129  
 C,0,3.048107231,1.088672199,-4.3391581613  
 C,0,-0.2930772025,1.2508025843,-3.4425667685  
 O,0,0.2891374622,2.1374170619,-4.0106480558  
 O,0,-1.5231162995,0.8374672778,-3.7027008069  
 C,0,-2.2218887411,1.5299875077,-4.7716262146  
 N,0,1.8345304628,1.8060128551,-1.672966511  
 C,0,2.1994617695,2.0640425443,-0.2438896351  
 C,0,3.4246363864,1.334832136,0.2136841008  
 C,0,3.3144734851,0.4741124607,1.3115010793  
 C,0,4.4159189374,-0.2538233322,1.7719863141  
 C,0,5.6494468223,-0.096290185,1.115543878  
 C,0,5.7829497918,0.7722830452,0.0170427408  
 C,0,4.6601912368,1.4787636988,-0.4226052582  
 C,0,4.2610502551,-1.1689808405,2.9259033412  
 O,0,6.7703411718,-0.7439628157,1.6264068254  
 C,0,7.0919178974,-1.9485864482,0.9303771592  
 C,0,7.0820002959,0.9415900918,-0.6738262724  
 C,0,2.3182744342,3.5345650034,0.0011181325  
 C,0,3.1489851518,4.3473980903,-0.7761755995  
 C,0,3.2581431882,5.7185392084,-0.525035136  
 C,0,2.5094452986,6.2740477044,0.526692371  
 C,0,1.6572374211,5.4761380459,1.3114074552  
 C,0,1.5692021161,4.109816535,1.0333525932  
 C,0,4.1497418452,6.554934732,-1.3604777164  
 O,0,2.5167799762,7.6491340779,0.7408193011  
 C,0,3.636972004,8.0976697507,1.5037024137  
 C,0,0.8475913694,6.0762969683,2.3959974117  
 H,0,-0.2123242993,0.441884712,-1.3444988573  
 H,0,-2.1302716509,-6.2026351713,-2.3111949115  
 H,0,0.1975875273,1.4104916424,2.2267112996  
 H,0,2.8586812267,-4.4241865389,-2.9857682593  
 H,0,4.8091856075,-5.9899223469,-3.0786359477  
 H,0,6.2168904128,-6.3557962302,-1.0539366905  
 H,0,5.6801439426,-5.1665466701,1.0734665143  
 H,0,3.7299403305,-3.6043108068,1.1856781254  
 H,0,2.2457456537,-3.651602029,5.8505153831  
 H,0,1.3306112064,-3.240037944,8.1469148359  
 H,0,-0.8110507043,-1.9968122329,8.4350922201  
 H,0,-2.0494039132,-1.1588238223,6.4367015408  
 H,0,-1.1479657655,-1.5586199248,4.1380810782  
 H,0,-1.584079497,4.0659422064,5.1454050439  
 H,0,-3.8597538947,3.2717195695,4.4833358951  
 H,0,-5.2536476644,1.6755305397,3.2360541223



|                                               | E (Thermal) | CV             | S              |
|-----------------------------------------------|-------------|----------------|----------------|
|                                               | KCal/Mol    | Cal/Mol-Kelvin | Cal/Mol-Kelvin |
| H,0,-6.9697285048,1.584486365,1.6154734125    |             |                |                |
| H,0,-9.1785461697,0.4379710248,1.5780709104   |             |                |                |
| H,0,-9.2963857672,-2.0535915239,1.4856362803  |             |                |                |
| H,0,-7.1909545096,-3.3952179702,1.4266749937  |             |                |                |
| H,0,-4.9757251796,-2.251322381,1.458719455    |             |                |                |
| H,0,-7.0407473896,-0.157140982,-2.0670909031  |             |                |                |
| H,0,-8.1491558048,2.0410059808,-2.4247548576  |             |                |                |
| H,0,-6.8846289852,4.1605429355,-2.0479042236  |             |                |                |
| H,0,-4.5014583585,4.0678864239,-1.3068740789  |             |                |                |
| H,0,-3.3867096567,1.8690667802,-0.9484768603  |             |                |                |
| H,0,-5.4003989898,-1.3215192226,-3.1638287065 |             |                |                |
| H,0,-5.0842981525,-3.5825045967,-4.0670520315 |             |                |                |
| H,0,-3.8604387392,-5.7602677454,-4.0389918062 |             |                |                |
| H,0,1.348067833,1.686994236,0.3503443905      |             |                |                |
| H,0,2.1258558969,2.5060126506,-2.3433081182   |             |                |                |
| H,0,2.1047226657,-0.2484460983,-1.3668545041  |             |                |                |
| H,0,2.7048974989,-1.9639839406,-2.8929853838  |             |                |                |
| H,0,3.9748765187,-2.6265510469,-4.909018537   |             |                |                |
| H,0,4.688898356,-0.9018966101,-6.555537682    |             |                |                |
| H,0,4.0982169749,1.4786289535,-6.1699787824   |             |                |                |
| H,0,2.7854173872,2.1329636668,-4.2093859905   |             |                |                |
| H,0,3.740568947,3.9187695412,-1.5994457965    |             |                |                |
| H,0,3.8190126619,7.6241239994,-1.3425705855   |             |                |                |
| H,0,4.1497639923,6.2002787164,-2.4202828573   |             |                |                |
| H,0,5.1986613047,6.5035204032,-0.972848736    |             |                |                |
| H,0,3.4931202865,9.2052588392,1.5612633751    |             |                |                |
| H,0,4.5912880444,7.8462095474,0.9798773533    |             |                |                |
| H,0,3.6217680477,7.6412966521,2.5229227199    |             |                |                |
| H,0,0.4328664841,5.2903773434,3.0754997664    |             |                |                |
| H,0,-0.004887247,6.653129305,1.9558166759     |             |                |                |
| H,0,1.4691723195,6.7870132169,2.9961710472    |             |                |                |
| H,0,0.8946828539,3.4834613346,1.6431568384    |             |                |                |
| H,0,2.3441035094,0.3501438812,1.8220587716    |             |                |                |
| H,0,5.1488707597,-1.8415976647,3.0239882621   |             |                |                |
| H,0,3.3413713061,-1.8015041483,2.8087542917   |             |                |                |
| H,0,4.162240528,-0.5782805435,3.8711469151    |             |                |                |
| H,0,7.9788607805,-2.3460020746,1.4834196598   |             |                |                |
| H,0,7.3536094998,-1.7219390133,-0.1320886129  |             |                |                |
| H,0,6.2375810955,-2.6700045694,0.9740060597   |             |                |                |
| H,0,7.1343158294,0.2643560716,-1.5635879497   |             |                |                |
| H,0,7.9290413636,0.6889745052,0.0120155582    |             |                |                |
| H,0,7.209863405,1.9946514129,-1.0259549895    |             |                |                |
| H,0,4.7633549582,2.155596049,-1.2838930029    |             |                |                |
| H,0,-1.6032627867,-4.4621548537,-0.5811323727 |             |                |                |
| H,0,0.4368669764,3.1186907081,4.0551068886    |             |                |                |
| C,0,-2.7306598466,2.8791983285,-4.3078532036  |             |                |                |
| H,0,-1.5365236292,1.6207678421,-5.6178301996  |             |                |                |
| H,0,-3.0365096876,0.8516129388,-5.0250956696  |             |                |                |
| H,0,-3.3241428922,3.3320573001,-5.106478688   |             |                |                |
| H,0,-3.3696126027,2.7659614452,-3.4251594284  |             |                |                |
| H,0,-1.9022100989,3.5491157843,-4.0714225598  |             |                |                |
| Total                                         | 855.839     | 307.257        | 454.970        |
| C,0,-5.4575606847,-2.6614074667,0.0542858013  |             |                |                |
| C,0,-5.534247772,-1.4229737629,0.7078667696   |             |                |                |
| C,0,-6.7908770273,-0.8317349579,0.9050650955  |             |                |                |
| C,0,-7.9459038449,-1.4642403401,0.449621477   |             |                |                |
| C,0,-7.861586475,-2.6952596892,-0.2001743912  |             |                |                |
| C,0,-6.616085177,-3.291221692,-0.3962720577   |             |                |                |
| C,0,-4.327147439,-0.8005285467,1.2621178421   |             |                |                |
| C,0,-3.1053761062,-0.7084876047,0.5229578807  |             |                |                |
| C,0,-1.940594191,-0.3695485891,1.2098408311   |             |                |                |
| C,0,-1.9637599173,0.0300084799,2.5837657152   |             |                |                |
| C,0,-3.2088468203,0.0596203043,3.2570371655   |             |                |                |
| C,0,-4.3704730431,-0.3859464328,2.5797334072  |             |                |                |
| C,0,-3.2512485361,0.4789028014,4.6157674627   |             |                |                |
| C,0,-2.0976585289,0.8254018329,5.2749835048   |             |                |                |
| C,0,-0.8492820686,0.7664883903,4.6100879023   |             |                |                |
| C,0,-0.7838867534,0.3783224978,3.2941731293   |             |                |                |
| C,0,-3.0527225245,-1.025504712,-0.9057927418  |             |                |                |
| C,0,-2.1627459126,-1.9975333263,-1.3738779686 |             |                |                |
| C,0,-2.2797018593,-2.5274599558,-2.7052051637 |             |                |                |
| C,0,-3.2207246535,-1.9447884064,-3.586466262  |             |                |                |
| C,0,-3.97904987,-0.8300272237,-3.1507192168   |             |                |                |
| C,0,-3.9002439837,-0.3683066814,-1.8500944415 |             |                |                |
| C,0,-1.5092964776,-3.6378205566,-3.1417262571 |             |                |                |
| C,0,-1.6716743644,-4.1418279723,-4.4099777715 |             |                |                |
| C,0,-2.6064746338,-3.5555025835,-5.2959023845 |             |                |                |
| C,0,-3.3630969718,-2.4810524772,-4.8960323888 |             |                |                |
| O,0,-1.1841225445,-2.5515168399,-0.610825732  |             |                |                |
| B,0,-0.2104447411,-1.7595023063,0.2256195345  |             |                |                |
| O,0,-0.7182037333,-0.3872927531,0.5745899514  |             |                |                |
| C,0,-4.6448338895,0.8502503619,-1.5133345477  |             |                |                |
| C,0,-4.0354224232,1.8877766458,-0.7930372619  |             |                |                |
| C,0,-4.7234649045,3.0746724022,-0.5473693869  |             |                |                |
| C,0,-6.0281958433,3.2395365047,-1.0111488741  |             |                |                |
| C,0,-6.6444969616,2.2103731945,-1.7224314269  |             |                |                |
| C,0,-5.958574406,1.0242580738,-1.9755586192   |             |                |                |
| O,0,1.02109622,-1.502040132,-0.5580003415     |             |                |                |
| B,0,2.0463063935,-2.3833660881,-0.4982087771  |             |                |                |
| O,0,2.1333034052,-3.3456082739,0.4698220279   |             |                |                |
| B,0,1.147271601,-3.3860674946,1.4574291449    |             |                |                |
| O,0,1.4224604719,-4.2979920301,2.4703821245   |             |                |                |
| C,0,0.6376408788,-4.5994090452,3.5631153585   |             |                |                |
| C,0,-0.6555697375,-4.1093333782,3.7781214652  |             |                |                |
| C,0,-1.3462617841,-4.5126119298,4.9200612736  |             |                |                |
| C,0,-0.758573898,-5.3891051281,5.8314248994   |             |                |                |
| C,0,0.531597557,-5.8712372254,5.6048675776    |             |                |                |
| C,0,1.2439367285,-5.4842404828,4.4740375767   |             |                |                |
| O,0,3.0315553406,-2.2281779128,-1.4948459118  |             |                |                |
| C,0,4.1687684606,-2.99959067,-1.6333338449    |             |                |                |
| C,0,4.7100046812,-3.027252538,-2.930617593    |             |                |                |
| C,0,5.9036733411,-3.7105800725,-3.1470085509  |             |                |                |
| C,0,6.5460651415,-4.365909115,-2.0962127973   |             |                |                |
| C,0,5.9903387481,-4.3445624369,-0.817028509   |             |                |                |
| C,0,4.7989957998,-3.663563415,-0.5734741461   |             |                |                |
| O,0,0.0827127019,-2.5696164468,1.3935437846   |             |                |                |
| N,0,0.5512250019,-0.6870116106,-3.0702982797  |             |                |                |
| N,0,0.8089984317,-1.5682763173,-3.6691639154  |             |                |                |
| C,0,0.5533536032,0.8699627991,-2.1478840421   |             |                |                |
| C,0,2.0178315288,1.1199362281,-1.8646412876   |             |                |                |
| C,0,2.8584267657,1.4477895022,-3.0739415296   |             |                |                |
| C,0,3.7718496795,0.4973424795,-3.5333145353   |             |                |                |
| C,0,4.5476431885,0.7583348513,-4.6612675205   |             |                |                |
| C,0,4.4189474933,1.9708427632,-5.3345310882   |             |                |                |
| C,0,3.50620103,2.9222893507,-4.8815686708     |             |                |                |
| C,0,2.7254484567,2.6605088052,-3.7592054089   |             |                |                |
| C,0,-0.1611983351,1.7284258699,-3.2019168107  |             |                |                |
| O,0,-0.303973839,1.3701841496,-4.342780862    |             |                |                |

## TS2f

E(RAM1) = -0.733425710501

E(RM062X) = -1385.06880864

E(RAM1) = -1.08586518483

|                                              |              |
|----------------------------------------------|--------------|
| Zero-point correction=                       | 1.282144     |
| (Hartree/Particle)                           |              |
| Thermal correction to Energy=                | 1.363866     |
| Thermal correction to Enthalpy=              | 1.364810     |
| Thermal correction to Gibbs Free Energy=     | 1.148639     |
| Sum of electronic and zero-point Energies=   | -1383.434225 |
| Sum of electronic and thermal Energies=      | -1383.352503 |
| Sum of electronic and thermal Enthalpies=    | -1383.351559 |
| Sum of electronic and thermal Free Energies= | -1383.567730 |

O,0,-0.563298809,2.8789263518,-2.6914475069  
 C,0,-1.2514460101,3.7716902174,-3.6068398983  
 N,0,1.6760446563,2.237920534,-1.0069906321  
 C,0,1.7415562762,2.0524137966,0.4791504988  
 C,0,3.1157038104,1.7798471894,1.0063821684  
 C,0,3.252375516,0.8610343258,2.0532147843  
 C,0,4.5060042632,0.5666906614,2.5968732573  
 C,0,5.639366165,1.2071662653,2.065581106  
 C,0,5.5232201489,2.1338151378,1.0137653586  
 C,0,4.254221257,2.4121381636,0.4981508994  
 C,0,4.6172674699,-0.4053540033,3.708684619  
 O,0,6.8909265307,1.0123158947,2.6416618573  
 C,0,7.5268951805,-0.1958790006,2.2239167896  
 C,0,6.716099086,2.8249204658,0.4733736205  
 C,0,1.1200840494,3.2456990298,1.1300161559  
 C,0,1.8400204615,4.4270663297,1.3254647903  
 C,0,1.237208399,5.5482932934,1.9017577925  
 C,0,-0.1186411572,5.4722618985,2.2687195621  
 C,0,-0.8609349441,4.2937876229,2.0738777329  
 C,0,-0.2260937975,3.185186801,1.5054737773  
 C,0,2.0127865209,6.7945530523,2.0957385104  
 O,0,-0.7445761624,6.6245693668,2.7355344637  
 C,0,-0.9126537866,6.6449608612,4.1531006971  
 C,0,-2.2908306194,4.2131797329,2.4505168515  
 H,0,-0.024188866,0.5152048584,-1.2880434809  
 H,0,-1.0847896722,-5.0086212267,-4.7469268667  
 H,0,0.177351522,0.3139221141,2.7596384187  
 H,0,4.1904063465,-2.5212870964,-3.7550365588  
 H,0,6.3362566033,-3.7383086909,-4.1580264162  
 H,0,7.4860107496,-4.905821696,-2.2789665229  
 H,0,6.490056531,-4.8729494834,0.0086648924  
 H,0,4.3415158468,-3.6642103631,0.4289247115  
 H,0,2.2583127346,-5.8570244603,4.2790442479  
 H,0,0.9931565674,-6.5638689059,6.323870257  
 H,0,-1.3108956234,-5.7019667535,6.7284997729  
 H,0,-2.3633818797,-4.1328673588,5.0977826989  
 H,0,-1.1136271184,-3.4160226733,3.0538185323  
 H,0,-2.1273573308,1.1430273254,6.3275388338  
 H,0,-4.2253521653,0.5097005476,5.1259174731  
 H,0,-5.3160253258,-0.4387033562,3.1420061291  
 H,0,-6.8613118826,0.1397520958,1.4167387403  
 H,0,-8.925884661,-0.9908951402,0.6064042052  
 H,0,-8.7741718056,-3.195135667,-0.5548873844  
 H,0,-6.5443276661,-4.2629361552,-0.9065140176  
 H,0,-4.4732122509,-3.1312818191,-0.1024771586  
 H,0,-6.452768543,0.2109394925,-2.5287571758  
 H,0,-7.6763999542,2.3319945637,-2.0829932438  
 H,0,-6.5703261572,4.1752073475,-0.8128308167  
 H,0,-4.2347735301,3.8809449862,0.0201132318  
 H,0,-3.0119389148,1.7540769155,-0.4076723603  
 H,0,-4.6358276658,-0.3286300311,-3.8779028577  
 H,0,-4.0977652096,-2.0230260371,-5.5746069053  
 H,0,-2.7220910632,-3.9764330192,-6.3056425005  
 H,0,1.1076528125,1.1754085666,0.6996527719  
 H,0,2.0263776108,3.1318658445,-1.3319430981  
 H,0,2.4352089374,0.2731119754,-1.3137293403  
 H,0,3.8685545766,-0.4443214489,-2.9964903973  
 H,0,5.2573280371,0.0142207645,-5.008640366  
 H,0,5.0262117168,2.1753741749,-6.210587087  
 H,0,3.398698086,3.8671235278,-5.4048997055  
 H,0,2.0069200002,3.4096966604,-3.4290771945  
 H,0,2.9026322204,4.4768768131,1.0395835499  
 H,0,1.5874438395,7.3962511576,2.937537309  
 H,0,1.9683054277,7.4189391834,1.1679157312  
 H,0,3.0840110046,6.5678355688,2.3193349842  
 H,0,-1.4544061403,7.6047629506,4.342871607  
 H,0,0.0820768396,6.6428353339,4.6610297809  
 H,0,-1.5217819895,5.7704091973,4.4880990017  
 H,0,-2.851669584,3.5603336106,1.7353105085  
 H,0,-2.7581018166,5.229308682,2.4510821154

H,0,-2.3935837494,3.7740873714,3.4752686525  
 H,0,-0.7955546073,2.2482310992,1.3618599768  
 H,0,2.3606847895,0.3565595757,2.46102951  
 H,0,5.5504035363,-0.2266627745,4.2989449913  
 H,0,4.6461743142,-1.4490231536,3.3041916627  
 H,0,3.7388215269,-0.3226269666,4.3954174635  
 H,0,8.4802032296,-0.2098766077,2.8085404984  
 H,0,7.7336145395,-0.1648984185,1.126746375  
 H,0,6.8924512733,-1.0805386889,2.4746473925  
 H,0,7.6284496384,2.1892878318,0.5973188192  
 H,0,6.8840911314,3.7818305182,1.0294020835  
 H,0,6.5860260283,3.0626960499,-0.6106073066  
 H,0,4.1711596416,3.142462821,-0.321296249  
 H,0,-0.8010352228,-4.0911633102,-2.4287653472  
 H,0,0.0638736352,1.0305914108,5.162652509  
 C,0,-2.6925958587,3.3482403356,-3.8002939237  
 H,0,-1.1745318224,4.7430621414,-3.1174322225  
 H,0,-0.7000595311,3.7851846035,-4.550580559  
 H,0,-3.2130194463,4.0981055919,-4.4018326771  
 H,0,-2.7509715724,2.3894707374,-4.3192081006  
 H,0,-3.2003691458,3.2649742995,-2.8331872414

## D. Side-products

### TS2-H-migration

E(RAM1) = -0.728076640075

E(RM062X) = -1385.05609651

E(RAM1) = -1.08032946431

|                                              |              |
|----------------------------------------------|--------------|
| Zero-point correction=                       | 1.278967     |
| (Hartree/Particle)                           |              |
| Thermal correction to Energy=                | 1.360993     |
| Thermal correction to Enthalpy=              | 1.361938     |
| Thermal correction to Gibbs Free Energy=     | 1.146744     |
| Sum of electronic and zero-point Energies=   | -1383.424877 |
| Sum of electronic and thermal Energies=      | -1383.342850 |
| Sum of electronic and thermal Enthalpies=    | -1383.341906 |
| Sum of electronic and thermal Free Energies= | -1383.557100 |

|       | E (Thermal) | CV             | S              |
|-------|-------------|----------------|----------------|
|       | KCal/Mol    | Cal/Mol-Kelvin | Cal/Mol-Kelvin |
| Total | 854.036     | 308.644        | 452.913        |

C,0,5.0778449818,-0.7880735526,0.3181626721  
 C,0,4.7671415872,-0.8408910185,-1.0437650872  
 C,0,5.6705282515,-1.4274891452,-1.9367985719  
 C,0,6.8781636193,-1.9696127158,-1.4890548428  
 C,0,7.1694432914,-1.9173185166,-0.1151688079  
 C,0,6.2764113235,-1.3255568683,0.797362918  
 C,0,3.5041214756,-0.246244902,-1.5876181624  
 C,0,3.668509139,1.23299402,-1.7385042583  
 C,0,4.221496135,1.709609602,-2.9343643796  
 C,0,4.416052706,3.0758442068,-3.1403932763  
 C,0,4.0322783105,3.974317563,-2.1266825924  
 C,0,3.4640156606,3.5161425232,-0.9262749253  
 C,0,3.2962250868,2.1377504107,-0.7431603445  
 C,0,4.9897752036,3.5672991783,-4.4138169838  
 O,0,4.1311258866,5.338243583,-2.3857312764  
 C,0,5.2449085237,5.9592337853,-1.7451047267  
 C,0,3.0347977045,4.4561690963,0.1347742772  
 C,0,7.8228733997,-2.5743584738,-2.4559729921  
 O,0,8.4060603461,-2.3500203238,0.355396006  
 C,0,8.4847967851,-3.7632957665,0.5323620951  
 C,0,6.6226579002,-1.2460861612,2.2341015525  
 N,0,2.2613065674,-0.6111377616,-0.8511372211  
 C,0,1.48926757,-1.6855110534,-1.3713903889  
 C,0,2.1058404143,-3.0740391028,-1.5314665394

C,0,1.7747249077,-3.883754071,-2.6205754363  
 C,0,2.2991352535,-5.1713023137,-2.7175152771  
 C,0,3.1589330554,-5.6508244794,-1.7312964293  
 C,0,3.5015585473,-4.8369247481,-0.6523262013  
 C,0,2.9779531736,-3.5496899337,-0.5518316247  
 C,0,0.13084007,-1.6901330645,-0.8488814121  
 C,0,-0.810917881,-2.7874956668,-1.2535833831  
 O,0,-1.2260528886,-2.6996706875,-2.3835661901  
 N,0,0.5695184773,-2.2639141843,1.2477831338  
 N,0,0.6923213918,-2.5763017559,2.2923455199  
 O,0,-1.0748504601,-3.6989395139,-0.3561253968  
 C,0,-2.0138858775,-4.7366113345,-0.7664138167  
 O,0,-1.8252939173,0.5228754698,-0.4760410816  
 C,0,-3.0904265269,0.7419157991,-0.9648159984  
 C,0,-4.2083362574,0.1733096804,-0.35498872  
 C,0,-5.5032394117,0.574894636,-0.813380177  
 C,0,-5.6242640878,1.3278419857,-1.9657240745  
 C,0,-4.4873868396,1.7833464296,-2.679216276  
 C,0,-3.1974036548,1.5340127891,-2.1523008794  
 C,0,-4.6083901132,2.5303895801,-3.8832839604  
 C,0,-3.4915445975,3.0201443016,-4.5150521409  
 C,0,-2.2047386758,2.7957663422,-3.9700325144  
 C,0,-2.0600022786,2.0708631067,-2.8120247628  
 C,0,-4.0395907514,-0.7746022556,0.7494541352  
 C,0,-3.2521657503,-0.4313630562,1.8526941488  
 C,0,-3.2116896563,-1.2549837888,3.0276222437  
 C,0,-3.914766329,-2.4825065002,3.0197465269  
 C,0,-4.5880915541,-2.8843574722,1.8399984449  
 C,0,-4.6455334216,-2.068584424,0.7246341172  
 C,0,-2.5054203265,-0.8628477522,4.1958555754  
 C,0,-2.5090306985,-1.6641483019,5.3123174883  
 C,0,-3.216990706,-2.8893629066,5.3086319678  
 C,0,-3.9030661454,-3.2921756202,4.1889156834  
 O,0,-2.5390164321,0.7286006592,1.9157467482  
 B,0,-1.5077784393,1.0705022383,0.8939587397  
 O,0,-0.2051483719,0.4182972563,1.2077695243  
 B,0,0.8029981571,1.1099057234,1.7694291696  
 O,0,1.9425000469,0.3465471616,2.1378645279  
 C,0,2.9164064959,0.7756581934,3.0196553603  
 C,0,3.4039514765,2.0883078175,3.0534698342  
 C,0,4.4357676805,2.402664671,3.9360736284  
 C,0,4.9723992055,1.4257533866,4.7748617939  
 C,0,4.4752912741,0.1225973191,4.7369719338  
 C,0,3.4422714958,-0.2153622589,3.8658565565  
 C,0,-5.2770697411,-2.6196608733,-0.4802881358  
 C,0,-4.6516752582,-2.5233885474,-1.7316201181  
 C,0,-5.2260089624,-3.1145620939,-2.8555588413  
 C,0,-6.4290800064,-3.8108886028,-2.7455925682  
 C,0,-7.0594628008,-3.9103044348,-1.50535582  
 C,0,-6.4887855884,-3.3210464924,-0.3793113365  
 C,0,-6.720254671,0.3049594344,-0.04101836  
 C,0,-6.7440030674,0.5301646242,1.3433049277  
 C,0,-7.9230691988,0.3527369175,2.0643473362  
 C,0,-9.0900209293,-0.04960547,1.415263901  
 C,0,-9.0745310069,-0.2749989238,0.0391993055  
 C,0,-7.8988618504,-0.0963704508,-0.6870981504  
 O,0,-1.3749619475,2.5156009598,0.910015742  
 B,0,-0.3388046487,3.1659637381,1.4559163061  
 O,0,0.7741646352,2.4674879632,1.9364259194  
 O,0,-0.2080399589,4.5455414937,1.5860767102  
 C,0,-1.1357599448,5.5093422013,1.2508480659  
 C,0,-2.4098775523,5.2475148778,0.7340742687  
 C,0,-3.2507060078,6.3207506124,0.4426746272  
 C,0,-2.8297636467,7.631637435,0.6631296297  
 C,0,-1.5572302339,7.8790661891,1.1803868226  
 C,0,-0.6975154489,6.8268002281,1.4797922036  
 H,0,-1.9684143656,-1.3607705458,6.2204098666  
 H,0,-1.0701751551,1.9021360805,-2.3600148698  
 H,0,2.9552095438,2.8608735449,2.4060149428  
 H,0,4.8224183307,3.4321469079,3.9726775559

H,0,5.7825915405,1.6839199812,5.4717666692  
 H,0,4.892374024,-0.6446506347,5.4059550225  
 H,0,3.0317818835,-1.2335038862,3.8399753953  
 H,0,0.3057438614,7.0045883638,1.8890999836  
 H,0,-1.2268317671,8.9135187941,1.3546718316  
 H,0,-3.4994904054,8.4711601077,0.4301285903  
 H,0,-4.2537221532,6.1250889727,0.035216989  
 H,0,-2.737342408,4.2088244219,0.5625762895  
 H,0,-3.5834729846,3.5995019209,-5.4453884449  
 H,0,-5.6137002552,2.7100552696,-4.2918476376  
 H,0,-6.6212098919,1.6206883121,-2.3303540055  
 H,0,-7.8907690828,-0.2770503189,-1.7724044584  
 H,0,-9.992258493,-0.5921999881,-0.4766219412  
 H,0,-10.0194267334,-0.1866826446,1.9860521651  
 H,0,-7.9303192861,0.533596826,3.1492027285  
 H,0,-5.8211560529,0.8466302613,1.8561882111  
 H,0,-6.9972842761,-3.3897271374,0.5945818208  
 H,0,-8.0133746833,-4.4502197998,-1.4150497392  
 H,0,-6.8822168366,-4.2737289883,-3.6338692816  
 H,0,-4.7291766773,-3.0223690417,-3.8326012795  
 H,0,-3.7094091813,-1.9596341436,-1.8288875739  
 H,0,-5.0670535185,-3.875396318,1.8247697463  
 H,0,-4.4621419847,-4.2391052531,4.1790028519  
 H,0,-3.2128479606,-3.5111646965,6.2159520607  
 H,0,3.3632479476,-0.6568917036,-2.6030621987  
 H,0,1.1005575022,-1.379671829,-2.3899210618  
 H,0,-1.9694258301,0.1003438124,4.1783206816  
 H,0,-1.3266804944,3.2173479753,-4.4801757172  
 H,0,-0.3231801576,-0.7530622908,-0.5034805026  
 H,0,1.1070628478,-3.5110246418,-3.3938048688  
 H,0,2.0423021009,-5.793573709,-3.5687722382  
 H,0,3.5718432786,-6.6512950117,-1.8097025455  
 H,0,4.1829418015,-5.2005359069,0.1098646096  
 H,0,3.2673705537,-2.9015208781,0.2733088127  
 H,0,4.5174841477,1.0010128912,-3.7232231293  
 H,0,2.8544623223,1.7859219513,0.2061879115  
 H,0,5.4399245392,-1.4551536972,-3.0133546421  
 H,0,4.3871861452,-0.2991850631,1.0281423162  
 H,0,5.5564878216,4.5175252903,-4.2473709054  
 H,0,5.6772069609,2.8104103443,-4.8641725003  
 H,0,4.1674108208,3.7797839462,-5.142933353  
 H,0,2.0919752212,4.1001803421,0.6289656142  
 H,0,3.8300716246,4.5389754098,0.9182774173  
 H,0,2.8470438479,5.4736309989,-0.2902574449  
 H,0,5.1370078072,7.0397914134,-2.0127116409  
 H,0,5.1929304729,5.8162916695,-0.6383665831  
 H,0,6.2017202844,5.5442553284,-2.1452151839  
 H,0,8.8669821359,-2.5507078839,-2.0546789407  
 H,0,7.5431432949,-3.6402102096,-2.6523941695  
 H,0,7.8023968111,-2.0219799944,-3.4276588397  
 H,0,5.7198937615,-1.0384918717,2.8625425636  
 H,0,7.0936295212,-2.2020861738,2.5746098537  
 H,0,7.3641406234,-0.4226736684,2.3957899639  
 H,0,9.5354868544,-3.9304436972,0.8776353058  
 H,0,7.7546111389,-4.0998337808,1.3077050842  
 H,0,8.2948885648,-4.2906593771,-0.4341842012  
 H,0,2.3136174315,-0.5586982098,0.1635542087  
 C,0,-2.3232553534,-5.5549713293,0.4640158847  
 H,0,-2.899723108,-4.2414712464,-1.1787685343  
 H,0,-1.5292091383,-5.3183064679,-1.5551959353  
 H,0,-3.0077307784,-6.3630458073,0.1946707747  
 H,0,-1.4134276186,-5.9923083783,0.880685322  
 H,0,-2.8038113988,-4.9332796827,1.2251776865

## TS2-phenyl-migration

enamine-TS1-ONIOM-M06-BB  
 E(RAM1) = -0.727321374470

E(RM062X) = -1385.06497071

E(RAM1) = -1.08143022017

Zero-point correction= 1.281644  
 (Hartree/Particle)  
 Thermal correction to Energy= 1.363640  
 Thermal correction to Enthalpy= 1.364584  
 Thermal correction to Gibbs Free Energy= 1.147408  
 Sum of electronic and zero-point Energies= -1383.429218  
 Sum of electronic and thermal Energies= -1383.347222  
 Sum of electronic and thermal Enthalpies= -1383.346278  
 Sum of electronic and thermal Free Energies= -1383.563454

|       | E (Thermal)<br>KCal/Mol | CV<br>Cal/Mol-Kelvin | S<br>Cal/Mol-Kelvin |
|-------|-------------------------|----------------------|---------------------|
| Total | 855.697                 | 307.331              | 457.086             |

C,0,5.9815961316,0.7792536049,0.0960795821  
 C,0,5.6053029074,-0.4732599085,0.6027798524  
 C,0,6.5536893808,-1.50552660539,0.6457999966  
 C,0,7.8509936295,-1.2891687634,0.185540284  
 C,0,8.2182019235,-0.0409092518,-0.3161009639  
 C,0,7.2811523439,0.9910463524,-0.3599494173  
 C,0,4.2652897204,-0.6709260669,1.1660674872  
 C,0,3.0866533025,-0.1843256534,0.5162916801  
 C,0,1.9051403114,-0.1295940985,1.2553798621  
 C,0,1.8007511331,-0.7122050738,2.5583538042  
 C,0,2.9467401073,-1.3290390289,3.115204816  
 C,0,4.17506938,-1.2606507934,2.4131456404  
 C,0,2.8450897237,-1.9514159914,4.3904391122  
 C,0,1.6588699244,-1.9359819669,5.0818938856  
 C,0,0.5223316856,-1.2906844914,4.5376368192  
 C,0,0.5925279258,-0.6884517427,3.3051474733  
 C,0,3.115499287,0.2916921675,-0.8689823492  
 C,0,2.6395257854,1.569169885,-1.1816868347  
 C,0,2.8460611436,2.1447576794,-2.4815690303  
 C,0,3.4601819492,1.3556348802,-3.4823348917  
 C,0,3.7915817454,0.0086483402,-3.1933319656  
 C,0,3.6127466571,-0.5261278103,-1.9305386829  
 C,0,2.4699607986,3.4809830238,-2.7797946525  
 C,0,2.7089778097,4.0093098053,-4.026054574  
 C,0,3.3322082664,3.2252001653,-5.0251170009  
 C,0,3.6982944354,1.9274502031,-4.7623840429  
 O,0,2.0250962741,2.3726324093,-0.2719147207  
 B,0,0.8354487952,1.9406210363,0.5324355972  
 O,0,0.770143494,0.4555543916,0.7425204294  
 C,0,3.8649294308,-1.9624190322,-1.7651408401  
 C,0,2.927824989,-2.7833374238,-1.1218234611  
 C,0,3.1256086076,-4.1611830569,-1.0523600422  
 C,0,4.2657481282,-4.7339174474,-1.6153762403  
 C,0,5.2082291607,-3.9240921056,-2.2484835218  
 C,0,5.0092505045,-2.5474054398,-2.3283428271  
 O,0,-0.4224051023,2.2621290329,-0.1890909074  
 B,0,-0.9571817264,3.4965903906,-0.0509216745  
 O,0,-0.5515305811,4.3740271161,0.9135901473  
 B,0,0.3460177742,3.9126821609,1.884310105  
 O,0,0.5254096676,4.8113436535,2.9297731672  
 C,0,1.3510842478,4.6664662567,4.0244693464  
 C,0,2.2495520849,3.6101144548,4.2138251032  
 C,0,3.0390696204,3.5967902499,5.3627923875  
 C,0,2.9349776075,4.618097195,6.306397228  
 C,0,2.0355218823,5.6663072058,6.1052076433  
 C,0,1.2348750678,5.7041174567,4.9678706703  
 O,0,-2.0233245922,3.7693494666,-0.9369190257  
 C,0,-2.751257973,4.9346848724,-1.0503033711  
 C,0,-3.5221538754,5.021287574,-2.2241575901  
 C,0,-4.3444778053,6.128855399,-2.407682456  
 C,0,-4.3950089124,7.1405370795,-1.4478137942  
 C,0,-3.6126894347,7.0504558202,-0.2967043305

C,0,-2.7831986362,5.9497752474,-0.0866940916  
 O,0,0.8982177723,2.6938091043,1.7766241028  
 N,0,-3.5763585901,1.5446023079,-0.0425737712  
 N,0,-4.1890285084,1.8484885274,0.8143355504  
 C,0,-2.6257798394,0.7502111557,-1.4487948457  
 C,0,-2.5254028985,-0.659135917,-1.0070607865  
 C,0,-1.7145970845,-1.0375646696,-2.2771549757  
 C,0,-2.3720418054,-1.6059929922,-3.3786228025  
 C,0,-1.6632330684,-1.8825158347,-4.5406620783  
 C,0,-0.3011596438,-1.5759438002,-4.6139370603  
 C,0,0.3497246331,-0.9997622555,-3.5251239722  
 C,0,-0.3534739925,-0.7197055368,-2.3544453796  
 C,0,-3.5554179357,1.0899917816,-2.6063577208  
 O,0,-4.7182346609,0.7709118897,-2.618117928  
 O,0,-2.8978500562,1.7356965145,-3.5459399019  
 C,0,-3.6340133081,2.021647194,-4.7582591599  
 N,0,-1.9556948172,-0.7669112076,0.2969886557  
 C,0,-2.1649063809,-1.9834473851,1.131611821  
 C,0,-3.6186717543,-2.2237449465,1.4086747338  
 C,0,-4.1795118558,-1.6416263555,2.5524196468  
 C,0,-5.5249432828,-1.8344107007,2.87686281  
 C,0,-6.3179559556,-2.6251245116,2.0259912715  
 C,0,-5.774290138,-3.2187831181,0.8731038556  
 C,0,-4.4236851578,-3.0070235852,0.5789338453  
 C,0,-6.0868477889,-1.2184036942,4.1009426707  
 O,0,-7.631621747,-2.9262152567,2.372253745  
 C,0,-8.5576377651,-1.8890997221,2.0501581784  
 C,0,-6.6017709659,-4.0790306874,-0.0030354467  
 C,0,-1.4588538828,-3.2400008373,0.7262416711  
 C,0,-1.5408102919,-3.7865969977,-0.5558310792  
 C,0,-0.8773148534,-4.9736416509,-0.8810399214  
 C,0,-0.1073034049,-5.6116097895,0.1072833644  
 C,0,-0.0042583362,-5.0768155389,1.4035454926  
 C,0,-0.6836773789,-3.8915393327,1.69523282  
 C,0,-0.9618788098,-5.5284713681,-2.2511895463  
 O,0,0.6453519923,-6.7256044569,-0.2533545214  
 C,0,0.0679415658,-7.9622649884,0.1640199626  
 C,0,0.8158152715,-5.7350397334,2.4465050101  
 H,0,-1.7405200931,1.3767770361,-1.3061779635  
 H,0,2.4254173086,5.0458788736,-4.2577314773  
 H,0,-0.2699024562,-0.1576545647,2.8712843313  
 H,0,-3.4546936717,4.224943007,-2.9706335345  
 H,0,-4.9527853836,6.2078632876,-3.320714709  
 H,0,-5.0462007934,8.0123957811,-1.6037374429  
 H,0,-3.64331683,7.85481934,0.4537554417  
 H,0,-2.146676347,5.8848015255,0.8112990531  
 H,0,0.5247537203,6.5232297031,4.79268735  
 H,0,1.9560129988,6.4722256762,6.8494267017  
 H,0,3.5620291549,4.5995425047,7.208677069  
 H,0,3.7491084643,2.7712651016,5.5200033595  
 H,0,2.3271258814,2.8064287994,3.4632209258  
 H,0,1.5795445274,-2.4132855451,6.0694864437  
 H,0,3.7380674365,-2.437707592,4.8103035232  
 H,0,5.0792490167,-1.6566820683,2.9012757492  
 H,0,6.2667883323,-2.4931094535,1.0370865157  
 H,0,8.586008637,-2.1061529632,0.2200751667  
 H,0,9.2431723886,0.1292483776,-0.675082616  
 H,0,7.5656811694,1.9774390617,-0.7545331173  
 H,0,5.2398580835,1.5934904298,0.058178953  
 H,0,5.7576693017,-1.9109994315,-2.8242649094  
 H,0,6.1122070391,-4.3711153896,-2.6868249692  
 H,0,4.4203104004,-5.820885069,-1.5588071048  
 H,0,2.3752178531,-4.7992982413,-0.5562081153  
 H,0,2.0349844809,-2.3285917964,-0.6647132161  
 H,0,4.1922775657,-0.6171376037,-4.0053427782  
 H,0,4.1882796008,1.3117007325,-5.5306091461  
 H,0,3.5227440929,3.6708031992,-6.0124548096  
 H,0,-1.7167512384,-1.6786158988,2.0942974873  
 H,0,-1.0002853245,-0.4104357443,0.3819084379  
 H,0,-3.501231557,-1.1598631498,-1.0473834202

H,0,-3.4338767431,-1.8335356119,-3.3151679752  
H,0,-2.1659271753,-2.3400860704,-5.3867694161  
H,0,0.2522902923,-1.7911153699,-5.5228758726  
H,0,1.4111184127,-0.7602123989,-3.5793387081  
H,0,0.1564266503,-0.2686077282,-1.5027657753  
H,0,-2.1220079848,-3.2754656111,-1.3402706363  
H,0,-0.8628029785,-6.6427145529,-2.2303595273  
H,0,-0.1281447279,-5.1198204854,-2.8767022471  
H,0,-1.9329144837,-5.2610618931,-2.734461873  
H,0,0.8107802353,-8.7289464456,-0.169511588  
H,0,-0.9174411328,-8.1190717761,-0.33789955534  
H,0,-0.054551008,-7.9829153035,1.2742963343  
H,0,1.2962447799,-4.974215448,3.1102930729  
H,0,1.6190502169,-6.3590755759,1.9806979694  
H,0,0.1727695193,-6.3978233229,3.0790550617  
H,0,-0.5877078481,-3.4597648023,2.7056040602  
H,0,-3.552400581,-1.0288182882,3.2196948776  
H,0,-6.9760696967,-1.7946400508,4.4600487702  
H,0,-6.4080756106,-0.1669425422,3.8905414541  
H,0,-5.3241451095,-1.1943066101,4.9180098957  
H,0,-9.5366724748,-2.2823841804,2.4215064159  
H,0,-8.588653402,-1.7254204232,0.9457422242  
H,0,-8.2840267907,-0.9420483516,2.5758808924  
H,0,-7.6779609896,-3.7783563802,0.0511144097  
H,0,-6.5232685771,-5.1445778035,0.3315891727  
H,0,-6.2611504188,-4.0162846306,-1.0653297694  
H,0,-3.9939041588,-3.490823764,-0.3122514563  
H,0,1.99372026,4.0758186312,-1.9834011808  
H,0,-0.4089117506,-1.2682942805,5.121302143  
C,0,-2.6830541558,2.7317203705,-5.6926096204  
H,0,-3.9955793713,1.0713844579,-5.1634822036  
H,0,-4.4993221031,2.634750928,-4.4905178901  
H,0,-3.2008214751,2.9786657906,-6.6227714756  
H,0,-2.3185571468,3.6557732827,-5.2380009339  
H,0,-1.8259086136,2.0961683353,-5.9269123609

C,0,-3.6787092284,0.6943866087,1.4485680236  
C,0,-3.3747770965,1.398146879,2.6205848005  
C,0,-3.1958399839,2.7823864282,2.5951402664  
C,0,-3.3039532561,3.4581969916,1.3646465666  
C,0,-3.559058261,2.7606780128,0.1711614453  
C,0,-3.7516991843,1.3758612901,0.2325164752  
C,0,-2.8697542857,3.5196568913,3.8369948135  
O,0,-3.0425709313,4.8244029597,1.341860484  
C,0,-4.2199040991,5.6262100999,1.2477832125  
C,0,-3.608091725,3.4503253198,-1.1385924569  
C,0,-8.4729669475,-1.5750612534,3.4953252738  
O,0,-9.5275059068,-1.6161825572,0.8170143032  
C,0,-9.9981571762,-2.9581379911,0.9372461849  
C,0,-7.9194263253,-1.3764989892,-1.4961923139  
N,0,-3.1002630345,-1.6220054261,0.6814695687  
C,0,-2.2289988417,-2.4827165432,1.222433225  
C,0,-1.6669631443,-3.6177027679,0.4467900323  
C,0,-1.2677952498,-4.7508278245,1.1650462506  
C,0,-0.7092727331,-5.8420103799,0.5055344552  
C,0,-0.5373714982,-5.8013507625,-0.8771452793  
C,0,-0.9207874026,-4.6679969994,-1.5931687978  
C,0,-1.4799797681,-3.573389361,-0.9380724898  
C,0,-0.5759626893,-1.4636631026,1.769671183  
C,0,-0.4909728771,-1.6450597445,3.2404363997  
O,0,-1.3399725878,-1.2025371739,3.9808521633  
N,0,0.4895207377,-2.0007780331,1.0884492744  
N,0,1.2245093529,-2.5863071962,0.5037899013  
O,0,0.5347433836,-2.4086533966,3.6206178369  
C,0,0.6428389772,-2.667905128,5.0373406568  
O,0,1.1973785867,0.530199942,0.5142915085  
C,0,2.4297366685,1.0539762,0.8350515457  
C,0,3.6066160958,0.4713344048,0.3675187471  
C,0,4.8387067171,1.1620200053,0.6046076313  
C,0,4.8690897302,2.247909569,1.4582128356  
C,0,3.689954929,2.7528537383,2.061055222  
C,0,2.4411797226,2.1849483628,1.7120466832  
C,0,3.7216551394,3.8486490984,2.9667869168  
C,0,2.555854443,4.3618176784,3.4805696  
C,0,1.3065440775,3.8112232258,3.1077482176  
C,0,1.2487238045,2.7473016013,2.2404158387  
C,0,3.5739155892,-0.7922370586,-0.3727512143  
C,0,2.7441041011,-0.9419657357,-1.488819654  
C,0,2.8815420149,-2.068833753,-2.3722085028  
C,0,3.7930791848,-3.0935502496,-2.0269842828  
C,0,4.494919286,-3.0094590406,-0.798501232  
C,0,4.3854015256,-1.9026183217,0.0219177388  
C,0,2.148313553,-2.1655415267,-3.5838603425  
C,0,2.3259035134,-3.2422987415,-4.4200871383  
C,0,3.2403263692,-4.2662147554,-4.0791475704  
C,0,3.9568326509,-4.196790848,-2.9088362439  
O,0,1.8043225038,-0.0338069918,-1.8554802415  
B,0,0.8077040342,0.6003213898,-0.9225067985  
O,0,-0.4843538754,-0.1542167402,-0.9971501774  
B,0,-1.3656510718,0.2039071054,-1.9519235151  
O,0,-2.4820906619,-0.6648920047,-2.1185397764  
C,0,-3.4508378971,-0.6232767099,-3.0993262756  
C,0,-3.633483827,0.4260097607,-4.0076480764  
C,0,-4.6662687468,0.337442278,-4.9403282726  
C,0,-5.5043513266,-0.7766549215,-4.9699033225  
C,0,-5.3135177459,-1.8169680477,-4.0595312514  
C,0,-4.2902209869,-1.7534960275,-3.1184349644  
C,0,5.0548168076,-1.9591372143,1.326826231  
C,0,4.391959174,-1.5536412051,2.4941113196  
C,0,5.0045263995,-1.6877381291,3.7383848731  
C,0,6.2871222163,-2.226254912,3.8353529682  
C,0,6.9572457363,-2.6266862846,2.6798271912  
C,0,6.3472820252,-2.4962196974,1.4339243077  
C,0,6.072314893,0.8226348657,-0.1123604983  
C,0,6.0509108814,0.6149653566,-1.4993615643  
C,0,7.2354873821,0.3742101822,-2.1925171516

## E. Trans-Aziridine Reaction Coordinate

### TS3

E(RAM1) = -0.758027203980

E(RM062X) = -1385.07281933

E(RAM1) = -1.11171428998

|                                              |              |
|----------------------------------------------|--------------|
| Zero-point correction=                       | 1.282965     |
| (Hartree/Particle)                           |              |
| Thermal correction to Energy=                | 1.364164     |
| Thermal correction to Enthalpy=              | 1.365108     |
| Thermal correction to Gibbs Free Energy=     | 1.151006     |
| Sum of electronic and zero-point Energies=   | -1383.436167 |
| Sum of electronic and thermal Energies=      | -1383.354968 |
| Sum of electronic and thermal Enthalpies=    | -1383.354024 |
| Sum of electronic and thermal Free Energies= | -1383.568126 |

|       | E (Thermal) | CV             | S              |
|-------|-------------|----------------|----------------|
|       | KCal/Mol    | Cal/Mol-Kelvin | Cal/Mol-Kelvin |
| Total | 856.026     | 306.610        | 450.616        |

C,0,-5.9703403519,-1.1025228457,0.0432577721  
C,0,-5.4196764141,-1.0313691979,1.3253200619  
C,0,-6.2457698299,-1.1922038536,2.4434596107  
C,0,-7.616533765,-1.4200700445,2.2970475402  
C,0,-8.153400835,-1.4922198197,0.9994457038  
C,0,-7.3379758159,-1.3324392208,-0.1355145441  
C,0,-3.9653434195,-0.7669480526,1.5514467848

C,0,8.452686697,0.3383632016,-1.5127494343  
 C,0,8.4821971688,0.544489665,-0.1339015855  
 C,0,7.3009307173,0.7887295788,0.563634743  
 O,0,0.6333046031,1.9644509006,-1.3981582549  
 B,0,-0.2608836151,2.2666525361,-2.3487561307  
 O,0,-1.2550773923,1.3445467743,-2.6949005425  
 O,0,-0.3640743908,3.4630185573,-3.049566843  
 C,0,0.4733670092,4.5554211471,-2.9679991141  
 C,0,1.5532266435,4.6703198657,-2.0850205276  
 C,0,2.3128295244,5.8392157329,-2.1005431942  
 C,0,2.0017720167,6.8752858651,-2.9804277055  
 C,0,0.9230872736,6.7474652098,-3.8568832358  
 C,0,0.1487798209,5.5913896245,-3.8632547662  
 H,0,1.768141228,-3.3145839588,-5.3647500335  
 H,0,0.286118402,2.3155005915,1.9235280544  
 H,0,-2.9662208195,1.3039052834,-3.9911929601  
 H,0,-4.8146465507,1.1566894593,-5.6601081774  
 H,0,-6.3130963125,-0.8380418868,-5.7119208691  
 H,0,-5.9703637941,-2.6993290618,-4.0866998058  
 H,0,-4.123100477,-2.5694330323,-2.402139399  
 H,0,-0.7014469329,5.4740224155,-4.548115353  
 H,0,0.6801621383,7.5647154656,-4.5516470799  
 H,0,2.6063721423,7.7929029049,-2.985508992  
 H,0,3.1638333693,5.9388083612,-1.4104700717  
 H,0,1.795135921,3.8463278054,-1.3938581605  
 H,0,2.5780958946,5.2108465547,4.1792930997  
 H,0,4.6971883967,4.2766112092,3.2405614311  
 H,0,5.8202144935,2.7665925843,1.6559417467  
 H,0,7.3285224392,0.9492866162,1.6517656555  
 H,0,9.4395746289,0.5169857416,0.4060728749  
 H,0,9.38594278,0.1499306596,-2.0622097613  
 H,0,7.2068591074,0.2137951857,-3.2802221558  
 H,0,5.0886463616,0.6407750126,-2.0358749312  
 H,0,6.8865012561,-2.8020045253,0.5242687645  
 H,0,7.9725670728,-3.0436156405,2.7495257986  
 H,0,6.7704100887,-2.3288791334,4.8173391144  
 H,0,4.4767109633,-1.3568483769,4.6447556343  
 H,0,3.3875272815,-1.1089614711,2.420872497  
 H,0,5.125793191,-3.860552521,-0.4998150966  
 H,0,4.6743649644,-4.9849541237,-2.637671755  
 H,0,3.3734460498,-5.1144736931,-4.7665773704  
 H,0,-3.7193278948,-1.078000089,2.5794769029  
 H,0,-2.471763711,-2.7373444675,2.2544962178  
 H,0,1.4499556353,-1.3504176842,-3.8346947525  
 H,0,0.3841375282,4.2531619115,3.5122827285  
 H,0,-0.7709583682,-0.4586733354,1.4017703414  
 H,0,-1.3981481914,-4.778081087,2.245196237  
 H,0,-0.4076384209,-6.7189773031,1.0691637445  
 H,0,-0.0955109491,-6.6469624266,-1.3945805905  
 H,0,-0.7696248336,-4.6259020552,-2.6668656611  
 H,0,-1.7501518861,-2.6860921056,-1.5014746953  
 H,0,-3.2701843054,0.8596208434,3.5767833367  
 H,0,-3.9538973396,0.8240787248,-0.7011016204  
 H,0,-5.8205271892,-1.1269354678,3.4572988568  
 H,0,-5.3322047603,-0.9745561295,-0.8482286027  
 H,0,-3.3241114809,4.5418557828,3.8154414076  
 H,0,-3.2411168254,2.9759350891,4.7393995181  
 H,0,-1.7591201229,3.6377489773,3.9239424483  
 H,0,-2.9919463526,2.8940877393,-1.8938731051  
 H,0,-4.6619709784,3.5028435267,-1.5095776713  
 H,0,-3.2029333975,4.4899092277,-1.0590803113  
 H,0,-3.8240316456,6.6680982497,1.1542956301  
 H,0,-4.8195503643,5.3456542253,0.3480149143  
 H,0,-4.8351748388,5.5156721258,-2.1736322299  
 H,0,-9.5336752415,-1.3091163245,3.2588801087  
 H,0,-8.4453698429,-2.6352413993,3.8534323541  
 H,0,-8.1167810483,-0.9154361406,4.3246316273  
 H,0,-7.1427864907,-1.6318522044,-2.2605127552  
 H,0,-8.7430425727,-2.1319101842,-1.5456015153  
 H,0,-8.3537505952,-0.3767685188,-1.7522063521

H,0,-11.1031292699,-2.866445693,0.7902851772  
 H,0,-9.5442653001,-3.6020506322,0.1455494286  
 H,0,-9.7636335617,-3.3656941065,1.9507471688  
 H,0,-3.0123825433,-1.3750168341,-0.3041006207  
 C,0,1.8900563959,-3.4978246165,5.2400589575  
 H,0,0.6921605515,-1.7073414974,5.556549231  
 H,0,-0.2642340593,-3.1855372737,5.3628416778  
 H,0,2.0240322582,-3.7061310965,6.3042802626  
 H,0,1.8150590399,-4.4485081003,4.7065955751  
 H,0,2.7717507452,-2.9623913203,4.8752595854

### Trans-anti-3a

trans-diazonium-intermediate-M06-BB

E(RAM1) = -0.755355440067

E(RM062X) = -1385.08624318

E(RAM1) = -1.11052977986

|                                              |              |
|----------------------------------------------|--------------|
| Zero-point correction=                       | 1.285070     |
| (Hartree/Particle)                           |              |
| Thermal correction to Energy=                | 1.366017     |
| Thermal correction to Enthalpy=              | 1.366962     |
| Thermal correction to Gibbs Free Energy=     | 1.154706     |
| Sum of electronic and zero-point Energies=   | -1383.445999 |
| Sum of electronic and thermal Energies=      | -1383.365051 |
| Sum of electronic and thermal Enthalpies=    | -1383.364107 |
| Sum of electronic and thermal Free Energies= | -1383.576363 |

|       | E (Thermal)<br>KCal/Mol | CV<br>Cal/Mol-Kelvin | S<br>Cal/Mol-Kelvin |
|-------|-------------------------|----------------------|---------------------|
| Total | 857.189                 | 306.822              | 446.730             |

C,0,5.1051748151,-1.5943859928,0.2331623862  
 C,0,4.9365783877,-1.3838788085,-1.1383843675  
 C,0,5.4991540117,-2.2831908223,-2.0492714369  
 C,0,6.2224036817,-3.3957493187,-1.6096860453  
 C,0,6.3743619945,-3.5958737385,-0.2269136429  
 C,0,5.8218573857,-2.6973907934,0.7046063827  
 C,0,4.1912327835,-0.190912487,-1.6519601382  
 C,0,4.9944856287,1.0497275505,-1.4195796359  
 C,0,5.8745088099,1.4577371232,-2.4293491181  
 C,0,6.6624019731,2.601484541,-2.280439481  
 C,0,6.545829328,3.3485408988,-1.095534166  
 C,0,5.6606962224,2.9598939138,-0.0739698065  
 C,0,4.894200359,1.8028795828,-0.246772805  
 C,0,7.5910730666,3.0081872423,-3.3598984107  
 O,0,7.2297985677,4.5532978739,-0.95850785  
 C,0,8.5845071381,4.3905081217,-0.5398296013  
 C,0,5.5337104713,3.7794422432,1.1522350256  
 C,0,6.8149425856,-4.330913349,-2.5932934438  
 O,0,7.1735439155,-4.6323721394,0.2469542989  
 C,0,6.5051013561,-5.8926423723,0.2845922692  
 C,0,6.0237137041,-2.9064832956,2.1561160919  
 N,0,2.7878121824,-0.0519612581,-1.1569277701  
 C,0,1.8014961734,-0.8633700198,-1.8320236764  
 C,0,1.606085778,-2.3009120161,-1.3867800799  
 C,0,1.7882003481,-3.3479096389,-2.2912771376  
 C,0,1.5837624278,-4.668847094,-1.8904885681  
 C,0,1.1920671542,-4.943569519,-0.5830576977  
 C,0,1.007176615,-3.8986793914,0.3243283466  
 C,0,1.2107632747,-2.5807081915,-0.0722318512  
 C,0,0.4700779053,-0.0750522743,-1.6253013244  
 C,0,0.5902941635,1.3898311568,-2.081087607  
 O,0,0.6721904985,1.6875164321,-3.2460264937  
 N,0,-0.5462585232,-0.690538046,-2.4475583223  
 N,0,-1.2310608367,-1.2131447192,-3.1271414119  
 O,0,0.6264026449,2.1751825196,-1.0334725048

C,0,0.8517545688,3.5934737292,-1.2657626288  
 O,0,-2.1403500274,0.45279024,-0.6327284885  
 C,0,-3.4548667057,0.3823229517,-1.0277294341  
 C,0,-4.3701347567,-0.4683875171,-0.4061321832  
 C,0,-5.747580549,-0.3746922116,-0.7842616374  
 C,0,-6.1130641151,0.3723058514,-1.8876590875  
 C,0,-5.1620926608,1.124176601,-2.6201388565  
 C,0,-3.8241953862,1.1788068411,-2.1604063623  
 C,0,-5.528387986,1.8676334859,-3.7764585256  
 C,0,-4.6045409376,2.6467190523,-4.4283674652  
 C,0,-3.2759898767,2.7297226679,-3.9471404327  
 C,0,-2.897359745,2.0146695892,-2.8374021255  
 C,0,-3.9322339422,-1.3908395397,0.6450215002  
 C,0,-3.2091698257,-0.8919066265,1.7308758112  
 C,0,-2.906536174,-1.7054833303,2.8710798677  
 C,0,-3.2816420595,-3.0693962443,2.8439230291  
 C,0,-3.8963390858,-3.5941804706,1.6799600934  
 C,0,-4.2086266886,-2.7925655278,0.5973299078  
 C,0,-2.2562972598,-1.1825505502,4.0202252635  
 C,0,-2.0004817624,-1.9910271603,5.1016686329  
 C,0,-2.3814144401,-3.3536798559,5.0797061473  
 C,0,-3.0057609569,-3.8835478114,3.9767860076  
 O,0,-2.8190228752,0.4176962836,1.7855162088  
 B,0,-1.8446020795,0.9187142897,0.7874216715  
 O,0,-0.481682991,0.3846576398,1.0510733954  
 B,0,0.4569908951,1.1263856641,1.67660141  
 O,0,1.6798249795,0.4623709781,1.9225268972  
 C,0,2.6637778893,0.8535061102,2.8055660619  
 C,0,2.8610025627,2.1682946443,3.2450452399  
 C,0,3.9189726047,2.4381079506,4.1125449658  
 C,0,4.76835809,1.4163640976,4.5356667528  
 C,0,4.560352783,0.1089096642,4.09419312  
 C,0,3.5089273724,-0.1877993167,3.2320025377  
 C,0,-4.7536670245,-3.4531859102,-0.5938142544  
 C,0,-4.2739026696,-3.1459757888,-1.8742192682  
 C,0,-4.7409680356,-3.8346349613,-2.9916675971  
 C,0,-5.6954559091,-4.8405804778,-2.8465456384  
 C,0,-6.1851414049,-5.1500993217,-1.5778677909  
 C,0,-5.7188716032,-4.4639963042,-0.4586154962  
 C,0,-6.8182966469,-0.9681609721,0.0235074646  
 C,0,-6.8266818097,-0.8033836061,1.4163864361  
 C,0,-7.8866013372,-1.295490468,2.1754458101  
 C,0,-8.9475519407,-1.9556101575,1.5561111292  
 C,0,-8.9460985182,-2.1230199695,0.1716482048  
 C,0,-7.8905333082,-1.6299111964,-0.5926743852  
 O,0,-1.850414179,2.3715707671,0.8869257843  
 B,0,-0.896628957,3.0627189386,1.526804954  
 O,0,0.2581107056,2.4419415392,2.0020609412  
 O,0,-0.8892513367,4.443599819,1.7312351264  
 C,0,-1.9003826175,5.338250939,1.4530312862  
 C,0,-3.1186140679,5.0053712268,0.8491080134  
 C,0,-4.0514013706,6.0148464685,0.6148466952  
 C,0,-3.7747150108,7.3331873236,0.9745573293  
 C,0,-2.5571643519,7.6517557133,1.5784161366  
 C,0,-1.6091297843,6.6638545303,1.825512102  
 H,0,-1.5006505912,-1.589067926,5.9947298807  
 H,0,-1.8755806611,2.0963723268,-2.430583473  
 H,0,2.1761177784,2.9701989423,2.9246216414  
 H,0,4.0770766249,3.4676068566,4.4675980085  
 H,0,5.5979734964,1.6383508426,5.2218232109  
 H,0,5.2262765909,-0.6980739729,4.4352665196  
 H,0,3.3198251409,-1.2156762172,2.8925050674  
 H,0,-0.6491875081,6.8968219027,2.3054861794  
 H,0,-2.3423063026,8.6915012887,1.8660380416  
 H,0,-4.5163150258,8.122184697,0.7865577477  
 H,0,-5.0131651768,5.7622918981,0.143975006  
 H,0,-3.3351868172,3.9595586757,0.5749931644  
 H,0,-4.8861465252,3.2224650993,-5.3221610283  
 H,0,-6.5682702879,1.8077697808,-4.1311287571  
 H,0,-7.1697400487,0.4238740485,-2.1935757078

H,0,-7.8923497543,-1.7664205685,-1.6843856836  
 H,0,-9.7800903586,-2.6438593595,-0.320464466  
 H,0,-9.7830362948,-2.3419134611,2.1572345067  
 H,0,-7.8833902079,-1.1602030628,3.2670103838  
 H,0,-5.986166793,-0.284618828,1.9057970711  
 H,0,-6.1181510195,-4.7049761524,0.5385083825  
 H,0,-6.9444724979,-5.9368452295,-1.4587429792  
 H,0,-6.0635503601,-5.3840609625,-3.7283249561  
 H,0,-4.3593621068,-3.5800649954,-3.9908337425  
 H,0,-3.5352758483,-2.340119002,-1.9900250288  
 H,0,-4.1095216703,-4.6739156396,1.6473864285  
 H,0,-3.3078491996,-4.9406917649,3.9515212711  
 H,0,-2.1718639011,-3.9807531093,5.9587551556  
 H,0,4.0923015817,-0.299788481,-2.7457195447  
 H,0,2.0309677221,-0.8357656878,-2.9050178704  
 H,0,-1.9721700297,-0.1176921939,4.015069818  
 H,0,-2.5559852531,3.3796631108,-4.4659423711  
 H,0,0.0827199822,-0.1506180111,-0.5965349294  
 H,0,2.0978886237,-3.1322072119,-3.3117928633  
 H,0,1.7272485573,-5.4775726854,-2.599967077  
 H,0,1.0233092227,-5.9692068132,-0.2707168066  
 H,0,0.6902258852,-4.108597915,1.3409604551  
 H,0,1.0519875304,-1.7735379152,0.6417370835  
 H,0,5.9546063404,0.8725223741,-3.358510516  
 H,0,4.2078037299,1.4972525152,0.5608125834  
 H,0,5.3853977199,-2.1152782607,-3.1314213659  
 H,0,4.6797235693,-0.8774796582,0.9566498793  
 H,0,7.7972390208,4.1066313913,-3.3099470396  
 H,0,8.5622243927,2.4611062083,-3.256433186  
 H,0,7.1606275924,2.7712752247,-4.3639023282  
 H,0,5.0711164,4.7671021651,0.9000319509  
 H,0,4.8996442079,3.2725608429,1.9229128876  
 H,0,6.5450086773,3.97763349,1.588461057  
 H,0,8.9791380486,5.436238178,-0.5018494981  
 H,0,8.6255418451,3.9133719393,0.4691549858  
 H,0,9.151243128,3.7774104417,-1.2823475196  
 H,0,7.6892732025,-4.8690159128,-2.1485796576  
 H,0,6.0554029126,-5.0906379779,-2.9076877149  
 H,0,7.1600204089,-3.782254813,-3.5040265671  
 H,0,5.338776196,-2.2602137688,2.7593549698  
 H,0,5.8424697504,-3.9779731168,2.4225620457  
 H,0,7.0809821172,-2.6595697719,2.429239255  
 H,0,7.2870200098,-6.5975316291,0.6622821694  
 H,0,5.6357070535,-5.8516061252,0.9845039687  
 H,0,6.1657745508,-6.185481339,-0.7388603674  
 H,0,2.7122981529,-0.1271208083,-0.1420319077  
 C,0,-0.4076563335,4.2670591203,-1.7705790243  
 H,0,1.1445333298,3.9636119855,-0.2823969915  
 H,0,1.6867129975,3.6884786248,-1.9656542443  
 H,0,-0.2512699786,5.3498958548,-1.7736226535  
 H,0,-0.6482233521,3.9483341134,-2.7878228864  
 H,0,-1.2494408603,4.0374618083,-1.1102647077

## TS4

E(RAM1) = -0.737583544491

E(RM062X) = -1385.06799008

E(RAM1) = -1.08771404902

Zero-point correction= 1.283115  
(Hartree/Particle)

Thermal correction to Energy= 1.364494

Thermal correction to Enthalpy= 1.365438

Thermal correction to Gibbs Free Energy= 1.150638

Sum of electronic and zero-point Energies= -1383.434744

Sum of electronic and thermal Energies= -1383.353365

Sum of electronic and thermal Enthalpies= -1383.352421  
 Sum of electronic and thermal Free Energies= -1383.567222

|       | E (Thermal) | CV             | S              |
|-------|-------------|----------------|----------------|
|       | KCal/Mol    | Cal/Mol-Kelvin | Cal/Mol-Kelvin |
| Total | 856.233     | 306.610        | 452.086        |

C,0,5.4525072191,-1.4293288488,0.3703927724  
 C,0,5.1274361252,-1.3998941335,-0.9883244475  
 C,0,5.7570925111,-2.2829594754,-1.8706504289  
 C,0,6.7078403533,-3.1995198754,-1.4124512727  
 C,0,7.0174519952,-3.2205050373,-0.0411433021  
 C,0,6.3960301431,-2.3364745938,0.8601498344  
 C,0,4.1233871738,-0.4240437342,-1.5172395524  
 C,0,4.6509151856,0.9710057118,-1.4195187755  
 C,0,5.4109613425,1.4511343462,-2.494180201  
 C,0,5.9491242289,2.7393341015,-2.477286189  
 C,0,5.6999938564,3.5585317665,-1.3617177316  
 C,0,4.9325425996,3.0974415382,-0.2775612618  
 C,0,4.4203897334,1.7956540498,-0.3159628025  
 C,0,6.7596499698,3.2198642604,-3.6198033249  
 O,0,6.1225802625,4.8845843326,-1.3629404559  
 C,0,7.4874730589,5.0451690772,-0.976983584  
 C,0,4.6500179048,3.9846696792,0.8733642009  
 C,0,7.3704448492,-4.118779311,-2.3659441628  
 O,0,8.0308203264,-4.0476461873,0.4340486878  
 C,0,7.610002737,-5.3936759043,0.6532742077  
 C,0,6.7536641352,-2.3470358699,2.2964891264  
 N,0,2.7656144393,-0.5717593927,-0.9126193961  
 C,0,1.9249622839,-1.6641354154,-1.3838530974  
 C,0,1.6167381721,-2.8102778634,-0.4548525618  
 C,0,2.0785223423,-4.0877286405,-0.7831056867  
 C,0,1.8145222869,-5.168830744,0.0559881464  
 C,0,1.0795403087,-4.9764669685,1.2237158304  
 C,0,0.6130520187,-3.7034916401,1.5510533951  
 C,0,0.8786116432,-2.6197597236,0.7174471888  
 C,0,0.8090879136,-0.6895717915,-1.6939406734  
 C,0,1.1098805379,0.1636620122,-2.9277512093  
 O,0,1.649748299,-0.3045602957,-3.9024458595  
 N,0,-0.5438157404,-1.600855629,-2.1828533176  
 N,0,-1.2366234209,-2.4229480753,-2.4013006401  
 O,0,0.734143711,1.4097436943,-2.7532383571  
 C,0,1.0595183419,2.3366072457,-3.8197803449  
 O,0,-1.870548252,0.503777643,-0.6680903997  
 C,0,-3.1983040199,0.6841665487,-0.9884566799  
 C,0,-4.1847584454,-0.1514839156,-0.4639538098  
 C,0,-5.553373427,0.1997225734,-0.6811475955  
 C,0,-5.8769887583,1.2107767732,-1.5661956287  
 C,0,-4.8757535663,1.9720244745,-2.2185459083  
 C,0,-3.5157946124,1.7442634411,-1.8964489808  
 C,0,-5.2058190122,3.0009757583,-3.1433824053  
 C,0,-4.2218741416,3.7825286991,-3.6968638124  
 C,0,-2.8657434327,3.5738319747,-3.3502320161  
 C,0,-2.5185353562,2.5762290012,-2.4713727012  
 C,0,-3.8131190038,-1.329615846,0.322988461  
 C,0,-2.9500650057,-1.1933051276,1.4156329986  
 C,0,-2.7252062186,-2.2812403813,2.3272632628  
 C,0,-3.3087476556,-3.5368337092,2.039738005  
 C,0,-4.0544543693,-3.6962189302,0.8460920805  
 C,0,-4.3075658837,-2.6317773504,-0.0002782564  
 C,0,-1.9533016416,-2.1241023767,3.5087911484  
 C,0,-1.7765547106,-3.1812157858,4.3697572597  
 C,0,-2.3652957505,-4.4366144314,4.0875664376  
 C,0,-3.1123799731,-4.6134016572,2.9484331258  
 O,0,-2.331615896,-0.0273175348,1.7383416978  
 B,0,-1.5367381423,0.7996431429,0.769748177  
 O,0,-0.096280249,0.457508214,0.889384473  
 B,0,0.6903911722,1.1228968705,1.7643479153  
 O,0,1.9645467399,0.5505632772,1.9859425469  
 C,0,2.856387587,0.9240849518,2.9710582787

C,0,2.932402479,2.2126938063,3.5149517443  
 C,0,3.9190915668,2.4893333671,4.4600915757  
 C,0,4.8146724992,1.4982503183,4.8608641059  
 C,0,4.7236466982,0.2155100223,4.3195070813  
 C,0,3.7465231265,-0.087104506,3.3749913101  
 C,0,-5.0366986042,-2.920811384,-1.2414104615  
 C,0,-4.6593113843,-2.3485054896,-2.4640693376  
 C,0,-5.3103085385,-2.7001794828,-3.6449081456  
 C,0,-6.3528110634,-3.6254515556,-3.6230917507  
 C,0,-6.7481224937,-4.1898407456,-2.4106307616  
 C,0,-6.0977194981,-3.8416603865,-1.2290679128  
 C,0,-6.6461470496,-0.4075668372,0.0886339503  
 C,0,-6.5358563419,-0.5507095379,1.4795680475  
 C,0,-7.6036418842,-1.052204257,2.2212141215  
 C,0,-8.7910165813,-1.4155839434,1.5863768346  
 C,0,-8.9084019716,-1.275437513,0.2038947652  
 C,0,-7.8450512727,-0.7711852597,-0.5421291512  
 O,0,-1.7492036041,2.1892783308,1.1391274118  
 B,0,-0.9326203683,2.8403297998,1.9830851739  
 O,0,0.2918198587,2.2824158766,2.3664486115  
 O,0,-1.15113166,4.0995067924,2.5318233564  
 C,0,-2.2676578591,4.8946521141,2.3865411676  
 C,0,-3.4384784532,4.5155882977,1.7197668903  
 C,0,-4.5019722841,5.4152486888,1.6636317607  
 C,0,-4.4006976615,6.6709180422,2.2612842564  
 C,0,-3.2275748225,7.0369323785,2.9232077136  
 C,0,-2.1506402579,6.158856577,2.9937971524  
 H,0,-1.1870531662,-3.0604151904,5.2899828805  
 H,0,-1.4681614925,2.4048854515,-2.1803359953  
 H,0,2.2047925378,2.9848843581,3.2152061873  
 H,0,3.983400029,3.4980681894,4.8949770874  
 H,0,5.5878853148,1.7246683821,5.6087230505  
 H,0,5.4233227797,-0.5682680042,4.6466199943  
 H,0,3.6552640844,-1.0973824472,2.9527292711  
 H,0,-1.2217004472,6.430111377,3.5128909884  
 H,0,-3.1495331241,8.0273136944,3.3951569465  
 H,0,-5.2445148163,7.3731726444,2.2126506994  
 H,0,-5.4265930868,5.1258927167,1.1425014808  
 H,0,-3.5112897998,3.5215953407,1.2489318889  
 H,0,-4.4751160035,4.5839985909,-4.4061225144  
 H,0,-6.2643896998,3.1607012526,-3.3964881537  
 H,0,-6.9320418182,1.4688246517,-1.748147617  
 H,0,-7.9414300864,-0.6641420785,-1.6328853109  
 H,0,-9.8424774373,-1.5614099883,-0.3007587599  
 H,0,-9.6322911951,-1.8099181349,2.1739620017  
 H,0,-7.506507544,-1.1592419963,3.3115541247  
 H,0,-5.5963383721,-0.2660606388,1.9806381452  
 H,0,-6.4285187272,-4.2793609988,-0.2746601585  
 H,0,-7.5790447447,-4.9099915774,-2.3844224002  
 H,0,-6.865085206,-3.9032250168,-4.555204212  
 H,0,-5.0043250203,-2.2391446518,-4.5952044257  
 H,0,-3.8608089373,-1.5923051408,-2.4853538521  
 H,0,-4.4262948535,-4.7025471182,0.599110244  
 H,0,-3.5784826168,-5.5837343338,2.7228118159  
 H,0,-2.221058666,-5.2654520895,4.7961905342  
 H,0,3.9719114973,-0.63251355,-2.5903666964  
 H,0,2.3321110022,-2.047309646,-2.3241831786  
 H,0,-1.5150966625,-1.1335508768,3.7143914892  
 H,0,-2.0980093032,4.2304871139,-3.7844387223  
 H,0,0.3461743723,-0.1787336232,-0.8463636588  
 H,0,2.6473159422,-4.2380204897,-1.6979693553  
 H,0,2.1752773081,-6.1580071997,-0.2072609871  
 H,0,0.861508468,-5.8180852033,1.8737114727  
 H,0,0.0201297558,-3.5479238073,2.4507199045  
 H,0,0.5023930983,-1.6343388352,0.9781624112  
 H,0,5.5957588971,0.8061878868,-3.3674433192  
 H,0,3.8295878282,1.4386374434,0.5457089154  
 H,0,5.5157592892,-2.2554297778,-2.9446652868  
 H,0,4.9671362986,-0.7232605308,1.0662500406  
 H,0,6.7290711871,4.3363973756,-3.6832921229



H,0,7.8257100783,2.9024163543,-3.4931694229  
 H,0,6.380583311,2.7964727561,-4.5822884004  
 H,0,3.8484147265,4.7158540539,0.5965197716  
 H,0,4.3061044107,3.4021969126,1.7652101872  
 H,0,5.5647665711,4.5666438867,1.1493689295  
 H,0,7.6547336176,6.1489159188,-1.0446477547  
 H,0,7.642459839,4.6830257703,0.0680443689  
 H,0,8.1586320246,4.4961842823,-1.6816577774  
 H,0,8.3653863762,-4.4453869447,-1.9719486081  
 H,0,6.7381704027,-5.0284314089,-2.5263299877  
 H,0,7.5249585282,-3.6205455141,-3.3546288189  
 H,0,5.9449734511,-1.8850625984,2.9162565803  
 H,0,6.9300639284,-3.3943279193,2.6480278739  
 H,0,7.6982945924,-1.7671824739,2.4543054243  
 H,0,8.5379217554,-5.9078934797,1.0075682467  
 H,0,6.8125402787,-5.4301622078,1.4343589276  
 H,0,7.2419299213,-5.847819098,-0.2988910524  
 H,0,2.7034341453,-0.4185718153,0.0950250703  
 C,0,0.0825319332,2.204312218,-4.9709963106  
 H,0,0.9937569382,3.3122052224,-3.3385856144  
 H,0,2.0895061633,2.1462173201,-4.1327372619  
 H,0,0.2994284794,2.9714284071,-5.7193030757  
 H,0,0.1708218041,1.2257506434,-5.4471693612  
 H,0,-0.9426476438,2.347891105,-4.6146472986

## Trans-aziridine 4a

trans-aziridine-ONIOM-M06-BB  
 E(RAM1) = -0.965580499603E-01

E(RM062X) = -671.229054554

E(RAM1) = -0.297404776099E-01

Zero-point correction= 0.597254  
 (Hartree/Particle)  
 Thermal correction to Energy= 0.633167  
 Thermal correction to Enthalpy= 0.634112  
 Thermal correction to Gibbs Free Energy= 0.522647  
 Sum of electronic and zero-point Energies= -670.698618  
 Sum of electronic and thermal Energies= -670.662705  
 Sum of electronic and thermal Enthalpies= -670.661761  
 Sum of electronic and thermal Free Energies= -670.773225

|       | E (Thermal) | CV             | S              |
|-------|-------------|----------------|----------------|
|       | KCal/Mol    | Cal/Mol-Kelvin | Cal/Mol-Kelvin |
| Total | 397.319     | 130.134        | 234.596        |

C,0,4.845998321,-0.0852986338,0.364001546  
 C,0,4.7676206902,-0.191489957,-1.0268418733  
 C,0,5.866253737,-0.6779725999,-1.7444185903  
 C,0,7.0411138192,-1.0571215684,-1.0899853572  
 C,0,7.0999163708,-0.9470023531,0.3108022327  
 C,0,6.0058467631,-0.4618145455,1.0484623145  
 C,0,3.5392383082,0.2159102833,-1.7778162  
 C,0,3.4359035983,1.7077960047,-1.819430656  
 C,0,3.8398039109,2.3754532277,-2.9815914152  
 C,0,3.790993261,3.7692675673,-3.0638257451  
 C,0,3.3162796454,4.4952292951,-1.9567976694  
 C,0,2.8964633844,3.8416454543,-0.7852003826  
 C,0,2.9640708457,2.4457640225,-0.730862522  
 C,0,4.2306577113,4.4534862252,-4.3015422355  
 O,0,3.1570875023,5.8758388044,-2.0454025951  
 C,0,4.3647037996,6.6001576325,-1.8139889304  
 C,0,2.3693292397,4.6051794034,0.3688230937  
 C,0,8.1930595432,-1.5628752335,-1.8714473521  
 O,0,8.2883752134,-1.2234167085,0.9819701553  
 C,0,8.4878307525,-2.6145782501,1.2292785712  
 C,0,6.0765351309,-0.3249701719,2.5211513516

N,0,2.3121505884,-0.4052431475,-1.1562660263  
 C,0,1.9943983195,-1.7686168035,-1.4818929121  
 C,0,1.5531092401,-2.6839860226,-0.3893430879  
 C,0,1.4700551562,-4.0576106772,-0.6279185777  
 C,0,1.0335916726,-4.9222529257,0.3738050123  
 C,0,0.6764355726,-4.4189827868,1.6234253508  
 C,0,0.7625978599,-3.0481134054,1.86664163  
 C,0,1.2005039972,-2.1839898919,0.8666901393  
 C,0,1.1132080741,-0.6386243877,-1.9500958427  
 C,0,1.0608344236,-0.3811977391,-3.4226108665  
 O,0,1.9309187478,-0.6572138974,-4.2204753069  
 O,0,-0.1011703872,0.1892005636,-3.7639334463  
 C,0,-0.2747621189,0.4660280259,-5.1645123892  
 H,0,3.6411128613,-0.1461101759,-2.8167671638  
 H,0,2.5690715459,-2.2311399813,-2.2876098143  
 H,0,0.1826268869,-0.4370914754,-1.4259764778  
 H,0,1.750935572,-4.4507232891,-1.6020685964  
 H,0,0.9762481223,-5.9888284157,0.1791459758  
 H,0,0.3369599711,-5.0918694691,2.404783595  
 H,0,0.4924631491,-2.6521095059,2.8408856942  
 H,0,1.288707356,-1.1164837139,1.0464136374  
 H,0,4.2009679651,1.7999194332,-3.8486122684  
 H,0,2.6387196451,1.9307061572,0.1866905123  
 H,0,5.8145966426,-0.7613761558,-2.8413790878  
 H,0,3.9851189703,0.2966732386,0.9351324688  
 H,0,3.7375418466,5.4530262238,-4.3968521522  
 H,0,5.3393938071,4.6067429053,-4.2817111664  
 H,0,3.9779724198,3.8429383405,-5.2031528064  
 H,0,1.2545241808,4.6771873253,0.2978885089  
 H,0,2.6304064347,4.1034219903,1.3326479465  
 H,0,2.7835787643,5.6441838306,0.3780034523  
 H,0,4.0636241362,7.6694103174,-1.9431057285  
 H,0,4.737255972,6.4147223258,-0.7775221175  
 H,0,5.1424259084,6.3122094339,-2.5627306504  
 H,0,9.1490434524,-1.4063667287,-1.3120030286  
 H,0,8.0731343974,-2.6584751683,-2.0672217526  
 H,0,8.2654142029,-1.0373429664,-2.8553975465  
 H,0,5.0806334619,-0.5223565188,2.9882464999  
 H,0,6.8245530511,-1.0379527358,2.9493042432  
 H,0,6.3944722207,0.713977278,2.7903379681  
 H,0,9.4792971898,-2.6546229302,1.7450674124  
 H,0,7.6799074222,-3.0123034297,1.8899863839  
 H,0,8.5163622418,-3.1822044392,0.26729503  
 C,0,-1.628102255,1.1210083953,-5.3282321582  
 H,0,0.5421606421,1.1143908889,-5.4942832616  
 H,0,-0.1997027662,-0.4754282149,-5.7167124409  
 H,0,-1.8021928209,1.3509066429,-6.3826396566  
 H,0,-2.4238773452,0.4574276437,-4.9815663634  
 H,0,-1.6775759466,2.0513661401,-4.7572485082

## F. SN1 mechanism

### TS2-SN1

E(RAM1) = -0.706049386828

E(RM062X) = -1385.05563475

E(RAM1) = -1.06115789833

Zero-point correction= 1.280465  
 (Hartree/Particle)  
 Thermal correction to Energy= 1.362316  
 Thermal correction to Enthalpy= 1.363260  
 Thermal correction to Gibbs Free Energy= 1.147460  
 Sum of electronic and zero-point Energies= -1383.420061  
 Sum of electronic and thermal Energies= -1383.338210  
 Sum of electronic and thermal Enthalpies= -1383.337266

Sum of electronic and thermal Free Energies= -1383.553066

|       | E (Thermal)<br>KCal/Mol | CV<br>Cal/Mol-Kelvin | S<br>Cal/Mol-Kelvin |
|-------|-------------------------|----------------------|---------------------|
| Total | 854.866                 | 307.885              | 454.190             |

C,0,-6.3127424142,-0.8494910708,2.3033845022  
 C,0,-6.1867177041,-1.7606973699,1.2447945707  
 C,0,-6.9466283724,-2.9395387658,1.2644406678  
 C,0,-7.8087864008,-3.2038846285,2.3266822494  
 C,0,-7.9281932965,-2.2933934068,3.3761801212  
 C,0,-7.1790248116,-1.117178428,3.3615596014  
 C,0,-5.3413553696,-1.4430217157,0.0889670186  
 C,0,-4.0171705146,-0.9208706315,0.2321544848  
 C,0,-3.3895662755,-0.3835393512,-0.8915452105  
 C,0,-3.9735978813,-0.4787362437,-2.1959875314  
 C,0,-5.2199457167,-1.1370609023,-2.3307218908  
 C,0,-5.8970375352,-1.5811643497,-1.1683478018  
 C,0,-5.7869831142,-1.2887953324,-3.6264634454  
 C,0,-5.1496812435,-0.7801180583,-4.7312007145  
 C,0,-3.9250275402,-0.0847615232,-4.5907535382  
 C,0,-3.3529747219,0.0659357886,-3.3511041667  
 C,0,-3.3510782965,-0.8859639398,1.5362399819  
 C,0,-2.8688362966,0.329954192,2.0285784924  
 C,0,-2.4431737246,0.4635836596,3.391661818  
 C,0,-2.4044929773,-0.6944989688,4.2043082147  
 C,0,-2.7246691777,-1.9516850992,3.6331667265  
 C,0,-3.1734198119,-2.0610077669,2.3301139183  
 C,0,-2.0824649751,1.7192971541,3.9480538971  
 C,0,-1.7081787149,-1.8131831255,5.2670899031  
 C,0,-1.6756020407,0.6578105737,6.0832867563  
 C,0,-2.0131282542,-0.569056664,5.5655615847  
 O,0,-2.8349863111,1.459053549,1.2596017149  
 B,0,-1.9937001501,1.4623768548,0.0247902311  
 O,0,-2.1517251586,0.2046577206,-0.8051121917  
 C,0,-3.3671105664,-3.4081551085,1.7829058465  
 C,0,-2.9155462251,-3.7311353283,0.4948673363  
 C,0,-3.0356252397,-5.0309389971,0.0071142571  
 C,0,-3.60799471,-6.0269605333,0.7976798645  
 C,0,-4.0650074404,-5.715076782,2.0778073413  
 C,0,-3.9463643822,-4.4165591177,2.5690356925  
 O,0,-0.545522246,1.466872593,0.3657494212  
 B,0,0.1378976275,2.6291661935,0.4369944603  
 O,0,-0.3708520025,3.8050420614,-0.0447050536  
 B,0,-1.5936863326,3.7652484102,-0.7168410049  
 O,0,-1.9100871285,4.9663278669,-1.3507105403  
 C,0,-3.0735966677,5.2719117942,-2.0235008717  
 C,0,-4.206489625,4.4512134098,-2.0766857898  
 C,0,-5.3260259644,4.8943340888,-2.7793927575  
 C,0,-5.3178157246,6.1339468768,-3.4178346825  
 C,0,-4.1828319494,6.9439507436,-3.3558091676  
 C,0,-3.0513355746,6.5257259935,-2.6624905839  
 O,0,1.4284331278,2.5446811459,1.015667903  
 C,0,2.2249359253,3.6199863792,1.3535174783  
 C,0,3.5845474048,3.3168173726,1.543002198  
 C,0,4.4454484052,4.3267348477,1.9649676381  
 C,0,3.9717330094,5.6197625474,2.1856400746  
 C,0,2.6226081851,5.9107729936,1.9828689997  
 C,0,1.7392890679,4.9171158674,1.5665967205  
 O,0,-2.3444688521,2.651975635,-0.7269905737  
 N,0,0.9143194608,-0.5479108649,1.3480310846  
 N,0,0.9900805559,-0.4183821645,2.4353438256  
 C,0,0.7172372353,-0.7889322938,-0.8281978554  
 C,0,1.8823013983,-0.0239796312,-1.4387178805  
 C,0,1.4121376529,1.254907235,-2.1156027545  
 C,0,0.1984290458,1.2593147204,-2.8038900287  
 C,0,-0.2593420663,2.4238946997,-3.4134242447  
 C,0,0.5101655661,3.584710402,-3.3659340443  
 C,0,1.7411616215,3.5707228116,-2.7145477834  
 C,0,2.1938746935,2.4105951705,-2.089708456

C,0,0.6728634665,-2.271906305,-0.8798868124  
 O,0,0.4161386346,-2.6131051229,-2.0119907815  
 O,0,0.8394241616,-3.0054069436,0.185443652  
 C,0,0.6351054944,-4.4407272965,0.0130966017  
 N,0,2.9762120682,0.2029912035,-0.5198266198  
 C,0,3.728293287,-1.0002093624,-0.0447453751  
 C,0,4.3882430918,-1.7439448984,-1.1658527958  
 C,0,4.4337076375,-3.1421238997,-1.1052734104  
 C,0,5.0685962518,-3.8842271544,-2.1031535156  
 C,0,5.6593161923,-3.2005354948,-3.1826074252  
 C,0,5.6182438296,-1.7979754769,-3.2635934826  
 C,0,4.9820776444,-1.0822208199,-2.2435327362  
 C,0,5.0972265157,-5.3629784476,-2.0342110929  
 O,0,6.1939727084,-3.9487105844,-4.2261322514  
 C,0,7.6191578418,-4.0331388888,-4.1956749508  
 C,0,6.230137197,-1.0732511539,-4.4011220288  
 C,0,4.7533411527,-0.6113709165,0.9727950725  
 C,0,5.6855964371,0.3955117437,0.708808624  
 C,0,6.663706901,0.7320910362,1.6498916632  
 C,0,6.6881766545,0.0435045246,2.875646379  
 C,0,5.7569991991,-0.9730810736,3.1582228923  
 C,0,4.7950464517,-1.2894937208,2.1956750207  
 C,0,7.6520829878,1.7911207069,1.3416172414  
 O,0,7.7054351392,0.2859513694,3.7929197563  
 C,0,7.4770142186,1.4400703496,4.6028004076  
 C,0,5.8013733826,-1.7141737302,4.4392954002  
 H,0,-0.27907225,-0.3324507357,-0.7478523415  
 H,0,-1.4332050685,2.7845478727,5.7027712854  
 H,0,-2.4161709479,0.6293504408,-3.2167161096  
 H,0,3.9568122101,2.297518653,1.3653483513  
 H,0,5.5099785796,4.097752484,2.1227357076  
 H,0,4.6611954327,6.4088803373,2.5171376092  
 H,0,2.2482535593,6.9315595327,2.151875055  
 H,0,0.675616914,5.1450991741,1.3907183322  
 H,0,-2.1525497389,7.1535513329,-2.5993641992  
 H,0,-4.1788334199,7.9229671497,-3.8571014728  
 H,0,-6.2054576037,6.4751820223,-3.9686107365  
 H,0,-6.2212643514,4.2564603769,-2.8259233871  
 H,0,-4.2075802547,3.4727499925,-1.5682978011  
 H,0,-5.5859761553,-0.897132296,-5.7339255787  
 H,0,-6.747615371,-1.8164235098,-3.7207969058  
 H,0,-6.9057911259,-2.0082405318,-1.2810453908  
 H,0,-6.8548878406,-3.6602813253,0.4382145708  
 H,0,-8.3977740763,-4.1323074758,2.3341149702  
 H,0,-8.6120824801,-2.5013349609,4.2113467319  
 H,0,-7.2707651279,-0.3951567493,4.1861598336  
 H,0,-5.7181791041,0.0783283376,2.292884067  
 H,0,-4.3244076017,-4.173614444,3.5740131856  
 H,0,-4.5275489045,-6.4943141902,2.7012456208  
 H,0,-3.7074097642,-7.050878952,0.4100468817  
 H,0,-2.6932655692,-5.2657543738,-1.0115258167  
 H,0,-2.4872769871,-2.9402680031,-0.1409703552  
 H,0,-2.5953993674,-2.852319438,4.2526232844  
 H,0,-1.9940559919,-1.4718991151,6.1931984714  
 H,0,-1.3780980725,0.7571141845,7.1375615412  
 H,0,3.038422461,-1.7131746463,0.45521507  
 H,0,2.6879395037,0.8193094162,0.2414345866  
 H,0,2.2546955468,-0.7183738283,-2.2167091203  
 H,0,-0.4167559154,0.36237275,-2.8460489619  
 H,0,-1.2248862976,2.4267726452,-3.909634253  
 H,0,0.143064236,4.4991872947,-3.8204451903  
 H,0,2.3427889451,4.4730412155,-2.6685199619  
 H,0,3.142225699,2.402010585,-1.563735325  
 H,0,5.6603338129,0.9253419434,-0.2570653499  
 H,0,7.2194262982,2.7984841158,1.5702351554  
 H,0,7.9316804789,1.7680269916,0.2594727393  
 H,0,8.579263806,1.6567672466,1.9530344589  
 H,0,8.3928444403,1.5005684689,5.2419036038  
 H,0,6.5629359057,1.2994953448,5.228905694  
 H,0,7.3747271121,2.3514582943,3.9646922918

H,0,4.7757730619,-2.0192066731,4.7615857403  
H,0,6.2604786332,-1.0853144624,5.2427371505  
H,0,6.426048582,-2.6357164553,4.3222463195  
H,0,4.0695495259,-2.0889127259,2.4119374186  
H,0,3.9745920976,-3.6712290664,-0.2549757422  
H,0,6.0174631158,-5.760836467,-2.5311898453  
H,0,4.2085847913,-5.7850440291,-2.5683740498  
H,0,5.0777804985,-5.7169645636,-0.9746731023  
H,0,7.8683574614,-4.629960642,-5.1082356759  
H,0,7.9565834604,-4.560403182,-3.2707582833  
H,0,8.0731191706,-3.0138417322,-4.2496067013  
H,0,6.2910059901,-1.7325923941,-5.3029268166  
H,0,7.265668296,-0.742982414,-4.1330547009  
H,0,5.6301081568,-0.1667041173,-4.6620131993  
H,0,4.9564868281,0.0180782479,-2.3007583698  
H,0,-2.1218641262,2.6059169882,3.2945131661  
H,0,-3.4449574472,0.3379960317,-5.4849307942  
C,0,1.2050174995,-5.1122531352,1.2392715709  
H,0,-0.4446771649,-4.5982246617,-0.0925727914  
H,0,1.1353277765,-4.7453787263,-0.908946843  
H,0,1.052166058,-6.1913499027,1.1627972576  
H,0,2.2770670876,-4.9177257358,1.3228606421  
H,0,0.7070740627,-4.7559368929,2.1437223422

## G. Cis-Aziridine minor enantiomer transition structures

### TS1-ent

E(RAM1) = -0.756470051791

E(RM062X) = -1385.07265592

E(RAM1) = -1.11033819608

Zero-point correction= 1.282662  
(Hartree/Particle)  
Thermal correction to Energy= 1.364045  
Thermal correction to Enthalpy= 1.364989  
Thermal correction to Gibbs Free Energy= 1.149285  
Sum of electronic and zero-point Energies= -1383.436126  
Sum of electronic and thermal Energies= -1383.354743  
Sum of electronic and thermal Enthalpies= -1383.353798  
Sum of electronic and thermal Free Energies= -1383.569503

|       | E (Thermal) | CV             | S              |
|-------|-------------|----------------|----------------|
|       | KCal/Mol    | Cal/Mol-Kelvin | Cal/Mol-Kelvin |
| Total | 855.951     | 306.642        | 453.988        |

C,0,-5.825767901,-2.1145408966,2.0470916837  
C,0,-5.0914876559,-1.4548292775,1.0562592064  
C,0,-5.5308332608,-1.4856340224,-0.2697006749  
C,0,-6.7003286912,-2.1674194265,-0.6182673503  
C,0,-7.4269804009,-2.8267148012,0.3902886504  
C,0,-6.9992181494,-2.8040700769,1.7298115755  
C,0,-3.8535652186,-0.7130777387,1.4450055066  
C,0,-4.0696052125,0.7602660559,1.3565343045  
C,0,-4.4714283907,1.433950004,2.5180483566  
C,0,-4.722009361,2.8067481583,2.4998791734  
C,0,-4.5471004022,3.5120435693,1.2934591627  
C,0,-4.1325443476,2.8556073878,0.1219944261  
C,0,-3.9124870044,1.4738347766,0.1672751003  
C,0,-5.1370561549,3.5088503494,3.735663193  
O,0,-4.6886586405,4.8950382952,1.3163486769  
C,0,-5.9109534246,5.3547098486,0.7388860789

C,0,-3.9114322306,3.5925868225,-1.1435429732  
C,0,-7.1774737341,-2.1691382028,-2.0194113971  
O,0,-8.6426003837,-3.4143542747,0.055098974  
C,0,-8.5685239419,-4.8325247183,-0.0911936204  
C,0,-7.7673651785,-3.4876302337,2.795626548  
N,0,-2.6522807263,-1.2008351697,0.6895024139  
C,0,-1.7992059883,-2.079722136,1.2365949283  
C,0,-1.1239318201,-3.1374999598,0.4388278988  
C,0,-0.909454191,-4.3718040749,1.0603314823  
C,0,-0.312805293,-5.4159027866,0.3587837294  
C,0,0.0785817313,-5.2245629867,-0.964331632  
C,0,-0.1249865785,-3.9891813966,-1.5810684287  
C,0,-0.7209862515,-2.9424402174,-0.8855149695  
C,0,-0.1639154291,-1.1349535928,1.9506901696  
N,0,-0.6150185324,0.1494216033,1.9958522349  
C,0,-0.0053357762,-1.718878091,3.306897314  
O,0,-2.0375027677,-0.1039577782,-2.0897292185  
C,0,-2.9011514427,-0.0177747436,-3.162672186  
C,0,-3.0764216215,1.1219230252,-3.9567181008  
C,0,-4.0011613615,1.0815673647,-4.999465123  
C,0,-4.7380315972,-0.0752031927,-5.2508834681  
C,0,-4.5525301286,-1.2065872365,-4.4553882925  
C,0,-3.6383759152,-1.1916078491,-3.4058320446  
B,0,-0.945953858,0.757762913,-1.7883978321  
O,0,-0.1108791014,0.3179400946,-0.8242294907  
B,0,1.2386842294,0.9656377347,-0.7616962108  
O,0,2.1329168909,0.3881405537,-1.8227208632  
C,0,2.8674938799,-0.740791981,-1.6270679016  
C,0,3.7443820438,-0.9009026853,-0.5499917042  
C,0,4.3257317571,-2.1893396816,-0.3357443  
C,0,4.1973235042,-3.1768859285,-1.2940036431  
C,0,3.4619401653,-2.9594331729,-2.4855760821  
C,0,2.7557632648,-1.7442215715,-2.649034487  
C,0,3.3870812327,-3.943735559,-3.5093099935  
C,0,2.6348794823,-3.7213997338,-4.6371542798  
C,0,1.9214639089,-2.509765387,-4.7939308774  
C,0,1.9807924728,-1.5403990298,-3.8210683802  
C,0,4.0535115969,0.2343786139,0.3226972875  
C,0,3.0315711023,0.9837846631,0.9039533025  
C,0,3.2987933472,2.017799426,1.8570693625  
C,0,4.6462747841,2.2826856028,2.2021198001  
C,0,5.6806989736,1.6048053028,1.5115838654  
C,0,5.4058772812,0.6387404082,0.5624370856  
C,0,2.2681286698,2.7846589218,2.4628777277  
C,0,2.5657342636,3.7350406638,3.4086401662  
C,0,3.9097658789,3.968230002,3.7866651577  
C,0,4.9278557794,3.2642547373,3.1924355001  
O,0,1.7098215878,0.7166000146,0.6291244351  
C,0,6.5265746488,0.1376755907,-0.240283584  
C,0,6.429846839,0.0894262706,-1.6387074312  
C,0,7.5246035065,-0.3038147351,-2.4058879861  
C,0,8.7260233777,-0.6522636558,-1.7893699876  
C,0,8.8298757879,-0.6070090611,-0.3994844338  
C,0,7.7391658593,-0.211605836,0.3722849122  
C,0,4.9971235136,-2.5430367666,0.91984892  
C,0,4.4270826559,-2.2021816645,2.1548131626  
C,0,5.0327266239,-2.6010291196,3.3448100243  
C,0,6.2117614474,-3.3453152574,3.3186133632  
C,0,6.7842770443,-3.6905875046,2.0948667485  
C,0,6.1818225301,-3.2949436488,0.9023568996  
O,0,-0.8051535336,1.9665925587,-2.4084298528  
B,0,0.2196297396,2.8163162449,-1.9718278617  
O,0,1.119622325,2.3840825799,-1.0765383986  
O,0,0.1402026581,4.0895372996,-2.5240859945  
C,0,1.009596923,5.1411458014,-2.3240809014  
C,0,0.6061430621,6.3408021846,-2.9388080588  
C,0,1.4204560643,7.4622511932,-2.8147068414  
C,0,2.6133038451,7.3977732592,-2.0928131221  
C,0,2.999988431,6.20194386,-1.4888145233  
C,0,2.2035628165,5.0629076212,-1.5978931156

H,0,1.3288286118,-2.3510712516,-5.7062420867  
H,0,1.2330444168,2.6133590401,2.1331419081  
H,0,-2.4806287278,2.0308205005,-3.7698780323  
H,0,-4.1420156684,1.9718310914,-5.630892953  
H,0,-5.4601580054,-0.0991181368,-6.0794045377  
H,0,-5.1235794697,-2.1239211788,-4.6637257467  
H,0,-3.4755476467,-2.0790339468,-2.7793121506  
H,0,-0.3338387718,6.3741264248,-3.5054237273  
H,0,1.1175343068,8.4058791095,-3.2916688861  
H,0,3.247811859,8.2904147829,-2.0018254025  
H,0,3.9407300902,6.1502891636,-0.9207280489  
H,0,2.503277419,4.1140225812,-1.1235138036  
H,0,4.1251428506,4.7273943983,4.5526311282  
H,0,5.9774445877,3.4489353514,3.4652718844  
H,0,6.7232507613,1.8939866838,1.7173121791  
H,0,7.8245850471,-0.1796787871,1.4687746964  
H,0,9.7748769901,-0.8817353324,0.0908321026  
H,0,9.5887080867,-0.9603926721,-2.3970093876  
H,0,7.4375338664,-0.3373449747,-3.5017707429  
H,0,5.4793033194,0.3614202152,-2.1255177218  
H,0,6.6429627618,-3.5608667233,-0.0611100309  
H,0,7.7162330608,-4.2737484826,2.0686782343  
H,0,6.6902894129,-3.6550262644,4.2585029632  
H,0,4.5824620862,-2.3183275152,4.3074143461  
H,0,3.4980358004,-1.6108409959,2.1762898719  
H,0,4.656297482,-4.1645197554,-1.1356057156  
H,0,3.9503077534,-4.8795882136,-3.3808208129  
H,0,2.5832144937,-4.4784390759,-5.4333534732  
H,0,-3.6304794001,-0.9468165736,2.4993492617  
H,0,-2.1227979336,-2.4197951444,2.2219262108  
H,0,1.4439711251,-0.583764536,-3.9283293296  
H,0,1.7682740837,4.3317330342,3.8743353913  
H,0,0.6417252084,-1.2099404391,1.2228266097  
H,0,-1.2170462131,-4.5181458298,2.0936590446  
H,0,-0.1540070346,-6.3734982074,0.8444499995  
H,0,0.5502115883,-6.0331805638,-1.5137576742  
H,0,0.2032164451,-3.8299467799,-2.6042649043  
H,0,-0.8468435988,-1.9759461625,-1.3601585194  
H,0,-4.6048447055,0.8789255639,3.4598842684  
H,0,-3.6050464732,0.9626812775,-0.7615282059  
H,0,-5.4905196925,-2.086747992,3.0956426221  
H,0,-4.9566045914,-0.9643975273,-1.055251427  
H,0,-5.7897273634,4.3833816654,3.4881829304  
H,0,-5.6938331031,2.8238785442,4.4205495016  
H,0,-4.2342409201,3.8944663291,4.2737350093  
H,0,-3.0459351656,3.1588723759,-1.7092292238  
H,0,-4.8220169764,3.5267123283,-1.7909992437  
H,0,-3.6963555585,4.6713591931,-0.9396746135  
H,0,-5.8261989485,6.4687119072,0.7936694409  
H,0,-5.9988316671,5.0135007782,-0.3211059759  
H,0,-6.7809589276,4.9916507161,1.3379508342  
H,0,-8.84177737,-3.5927335159,2.5015219711  
H,0,-7.3485329139,-4.5099108698,2.9762103912  
H,0,-7.7148516104,-2.9129899506,3.7530557459  
H,0,-6.3346832573,-1.9843836541,-2.7322643311  
H,0,-7.659296905,-3.1475917121,-2.2682583835  
H,0,-7.9427067692,-1.3635474412,-2.1575340213  
H,0,-9.6196878429,-5.1293496374,-0.3320672397  
H,0,-7.8780538867,-5.1017349587,-0.9267237333  
H,0,-8.2289626777,-5.3065702328,0.8617848477  
H,0,-2.5707911011,-0.9735320427,-0.3017416925  
O,0,0.8580983447,-2.7266494078,3.2656287111  
O,0,-0.6562809695,-1.3857985529,4.2730171833  
C,0,1.0027047669,-3.4933830128,4.4799502318  
C,0,2.0159545491,-4.5771695624,4.190042693  
H,0,1.3247673266,-2.8187363134,5.2777127586  
H,0,0.0217904106,-3.8968155259,4.7509000204  
N,0,-1.1536648245,1.1136906569,1.9152010636  
H,0,2.1626642239,-5.194809393,5.0793239848  
H,0,1.6719636166,-5.2140781903,3.3711080277

H,0,2.9764080093,-4.1355461925,3.9053778193

## TS2-ent

cis-RC-TS7-ent-ONIOM-M06  
E(RAM1) = -0.734088648194

E(RM062X) = -1385.07065561

E(RAM1) = -1.09110689097

Zero-point correction= 1.282629  
(Hartree/Particle)  
Thermal correction to Energy= 1.364141  
Thermal correction to Enthalpy= 1.365085  
Thermal correction to Gibbs Free Energy= 1.150521  
Sum of electronic and zero-point Energies= -1383.431009  
Sum of electronic and thermal Energies= -1383.349497  
Sum of electronic and thermal Enthalpies= -1383.348553  
Sum of electronic and thermal Free Energies= -1383.563117

|       | E (Thermal) | CV             | S              |
|-------|-------------|----------------|----------------|
|       | KCal/Mol    | Cal/Mol-Kelvin | Cal/Mol-Kelvin |
| Total | 856.011     | 307.149        | 451.588        |

C,0,4.282292121,0.2455143171,-1.528336443  
C,0,4.1194950973,0.6557201148,-0.2005295034  
C,0,5.2038339746,0.5796672789,0.6779550263  
C,0,6.4491157539,0.1129501523,0.2481731459  
C,0,6.5965029935,-0.2829624027,-1.093299425  
C,0,5.5159439231,-0.2225724759,-1.990973334  
C,0,2.7901837059,1.2024533215,0.2253698917  
C,0,2.8451054978,2.6967471551,0.2608734316  
C,0,2.1307336186,3.4331143398,-0.6893330985  
C,0,2.2077801558,4.8295356376,-0.7162418093  
C,0,2.9975206829,5.4858345499,0.2444085028  
C,0,3.7004738531,4.7625999953,1.2240673395  
C,0,3.6143182199,3.3682399033,1.2166292034  
C,0,1.4469489704,5.6006173438,-1.7257260015  
O,0,2.9903637589,6.8774396256,0.2766504038  
C,0,4.1450887466,7.4636567147,-0.3235590779  
C,0,4.521244425,5.4493563247,2.2477188641  
C,0,7.5927906868,0.0681463221,1.1875422611  
O,0,7.863274897,-0.6392892283,-1.5468438142  
C,0,8.0555126411,-2.0497101591,-1.6478000635  
C,0,5.6642907394,-0.64184028,-3.4038489201  
N,0,2.2867561081,0.667996992,1.5284113287  
C,0,2.0280088277,-0.7514615691,1.6424222255  
C,0,2.9313611106,-1.628105856,2.4858781896  
C,0,3.0758750963,-2.9678141829,2.109507168  
C,0,3.8631986842,-3.8332998066,2.8660871011  
C,0,4.5200654626,-3.3644268982,4.0020339207  
C,0,4.3888912571,-2.0279087686,4.3751220162  
C,0,3.5965515793,-1.1619331756,3.6237725133  
C,0,0.629200206,-0.5210712347,2.1713252094  
N,0,-0.0886660657,-2.1351861417,2.3955370124  
C,0,0.4491232189,0.0436639876,3.5871767944  
O,0,1.6715450327,-2.9431416804,-1.0415366862  
C,0,2.4450351581,-3.8922281829,-1.6778595322  
C,0,2.0168683261,-5.1866763091,-1.9955794578  
C,0,2.9207045239,-6.0692953592,-2.5857664306  
C,0,4.2282861115,-5.6690540643,-2.8582548433  
C,0,4.6398002539,-4.3724253439,-2.5466986673  
C,0,3.7574071633,-3.4709790186,-1.9592918844  
B,0,0.2701399317,-2.9240741712,-0.921810568  
O,0,-0.2419100365,-1.8563167201,-0.2621469335  
B,0,-1.7109751664,-1.6255134733,-0.378058451  
O,0,-2.038678064,-0.9696314442,-1.6831855253

C,0,-1.7992451093,0.3645108427,-1.8443639442  
 C,0,-2.4221983812,1.3253924428,-1.0441982428  
 C,0,-1.9998307989,2.6851069059,-1.1591785153  
 C,0,-1.1305455823,3.0542533496,-2.1687290858  
 C,0,-0.6162983516,2.1081749421,-3.0900083399  
 C,0,-0.9274933338,0.7382182171,-2.9197508166  
 C,0,0.2302038835,2.4941248016,-4.1657697077  
 C,0,0.7364576491,1.551662443,-5.0273757063  
 C,0,0.4273030703,0.1819612935,-4.8523065596  
 C,0,-0.3863452025,-0.2179124962,-3.8193789874  
 C,0,-3.4727053114,0.9154161978,-0.108684482  
 C,0,-3.2355328506,-0.1032642417,0.8145736558  
 C,0,-4.1922694183,-0.4369786009,1.8262251798  
 C,0,-5.4211351796,0.2670468405,1.8515310451  
 C,0,-5.701629087,1.206291472,0.8295893973  
 C,0,-4.7758628313,1.5036878683,-0.1523972089  
 C,0,-3.9555225096,-1.441807909,2.8011883677  
 C,0,-4.8860552868,-1.70871636,3.7756867634  
 C,0,-6.1025940262,-0.9863514263,3.8168266922  
 C,0,-6.3661325995,-0.0231327858,2.8748391909  
 O,0,-2.0448823102,-0.792394629,0.8279870801  
 C,0,-5.2133485199,2.3506343293,-1.2670822892  
 C,0,-4.9826459303,1.9527522988,-2.5919830922  
 C,0,-5.4705350027,2.717210034,-3.6499972565  
 C,0,-6.1920516811,3.8841203106,-3.3996695508  
 C,0,-6.4251289957,4.2861122806,-2.0848193121  
 C,0,-5.9427188605,3.5235761485,-1.0230274416  
 C,0,-2.3879044749,3.7087161666,-0.1829190963  
 C,0,-2.347197494,3.4366987377,1.192028239  
 C,0,-2.6437061728,4.4347570074,2.1177451695  
 C,0,-2.9855261728,5.715394917,1.6844020063  
 C,0,-3.0325281391,5.9939218042,0.3188031982  
 C,0,-2.7335313709,4.9996685828,-0.6105107546  
 O,0,-0.5187487646,-3.9512287183,-1.3688247526  
 B,0,-1.869174806,-3.9591692238,-1.0116122732  
 O,0,-2.4107831558,-2.9026443167,-0.3789226543  
 O,0,-2.5130035721,-5.1530142055,-1.3167487681  
 C,0,-3.8439229972,-5.4545562801,-1.1180732137  
 C,0,-4.1677170638,-6.8022440118,-1.3603186069  
 C,0,-5.4909054289,-7.2080806572,-1.2165676446  
 C,0,-6.4766037002,-6.2958566498,-0.8363855035  
 C,0,-6.1406094065,-4.9635544236,-0.5989276802  
 C,0,-4.8229486498,-4.5296396711,-0.7368921506  
 H,0,0.8417976984,-0.5549733682,-5.5551701326  
 H,0,-3.0128044916,-2.0046529388,2.7440669101  
 H,0,0.9766182335,-5.493955472,-1.8003805992  
 H,0,2.5923235913,-7.0878792581,-2.841372953  
 H,0,4.93308249,-6.3716481727,-3.3249369284  
 H,0,5.6684374665,-4.0523733844,-2.771613428  
 H,0,4.0650083566,-2.4416144305,-1.7181179891  
 H,0,-3.3810031555,-7.5061620373,-1.6630316638  
 H,0,-5.7580672429,-8.2581037394,-1.4059270501  
 H,0,-7.5182025506,-6.6285893011,-0.7263658383  
 H,0,-6.9176972276,-4.2436878558,-0.3018200429  
 H,0,-4.5497479642,-3.4778172967,-0.5518552917  
 H,0,-6.833727509,-1.2149090855,4.6058377794  
 H,0,-7.3127575369,0.5374123351,2.8890863636  
 H,0,-6.6973255001,1.6762576495,0.8084234138  
 H,0,-6.1262141993,3.8454513312,0.0129686339  
 H,0,-6.9921094235,5.2063320449,-1.8830859289  
 H,0,-6.5766126553,4.4848690225,-4.236172039  
 H,0,-5.2843923728,2.3956776123,-4.6852196339  
 H,0,-4.4087940166,1.0327244094,-2.7893550504  
 H,0,-2.7795874639,5.2218773838,-1.6874405878  
 H,0,-3.306050006,7.0011034135,-0.0278387221  
 H,0,-3.2172294389,6.5022551622,2.4162275288  
 H,0,-2.6083647159,4.2102379453,3.1933946014  
 H,0,-2.0880696993,2.4227945896,1.5335050245  
 H,0,-0.8045174714,4.1027417292,-2.2602450469  
 H,0,0.4621508972,3.5616396919,-4.2956479116

H,0,1.384677401,1.8501594405,-5.8644043934  
 H,0,2.040476224,0.9015750198,-0.5250499637  
 H,0,1.9255450191,-1.1844246492,0.6428631657  
 H,0,-0.6456883314,-1.2783822668,-3.666978967  
 H,0,-4.7045347579,-2.492437174,4.5249233316  
 H,0,-0.1112297708,-0.193982569,1.4373102064  
 H,0,2.5885082404,-3.3175018025,1.2019025823  
 H,0,3.9721205083,-4.8687465479,2.558884754  
 H,0,5.1396605829,-4.0342770445,4.5899073609  
 H,0,4.9051258226,-1.6555629331,5.2544978339  
 H,0,3.4999520787,-0.1261016382,3.9344482313  
 H,0,1.4912524296,2.9200949521,-1.4294899975  
 H,0,4.1764904154,2.8017440583,1.9746001695  
 H,0,3.4321130155,0.2943580487,-2.2282700732  
 H,0,5.0906021345,0.8881846866,1.7286677066  
 H,0,0.4333048361,5.8535523525,-1.3217791689  
 H,0,1.9719863289,6.558372485,-1.9673405185  
 H,0,1.3167839741,5.0103253771,-2.6666268551  
 H,0,5.5918639101,5.4827645132,1.9225193723  
 H,0,4.1650010783,6.4988852042,2.4000212234  
 H,0,4.4684439085,4.9098626352,3.2252611844  
 H,0,3.9842031044,8.56261264,-0.1925350692  
 H,0,5.0714939096,7.1307218166,0.2049288233  
 H,0,4.1991954017,7.1963257338,-1.4066001407  
 H,0,6.7292351343,-0.5510310253,-3.7334954872  
 H,0,5.3451088156,-1.7104034891,-3.5195589036  
 H,0,5.0276964495,-0.012273605,-4.0731608753  
 H,0,7.2499251957,-0.1657627728,2.2249856065  
 H,0,8.3355160211,-0.7054645409,0.8692623656  
 H,0,8.1109964174,1.0603635606,1.2004466635  
 H,0,9.0910201396,-2.1485815719,-2.0586394589  
 H,0,7.9803865289,-2.5250007335,-0.6398328734  
 H,0,7.3059083624,-2.4990460552,-2.3446432283  
 H,0,2.6965730893,1.0866814739,2.3554915136  
 O,0,-0.6777319891,-0.3815220814,4.1306133088  
 O,0,1.2398812685,0.7902846678,4.1046922928  
 C,0,-1.0061999737,0.1532548682,5.4378507654  
 C,0,-2.1925426393,-0.6306835893,5.9481868842  
 H,0,-0.1263377867,0.0555351209,6.0785291276  
 H,0,-1.2285350591,1.2163579003,5.3101045235  
 N,0,-0.3666193541,-3.1853405287,2.5442282546  
 H,0,-2.5280916561,-0.2073509487,6.8980548332  
 H,0,-3.0203253106,-0.590819442,5.2325101156  
 H,0,-1.9242044649,-1.676906283,6.1120319286
